# Supplementary material for: Genetic inhibitors of APOBEC3B-induced mutagenesis
Source: Genome Res. 2023 Sep;33(9):1568–81. doi: 10.1101/gr.277430.122 (PMC10620048; doi:10.1101/gr.277430.122)
Supplement: Supplement 3 [file Supplemental_Table_S3.xlsx]

## Sheet: Sheet2
deleted ORF	gene deletion	plasmid (APOBEC)	fold change A3B expression compared to wild-type	Expression SD	Expression SEM	fold change CAN1 mutation rate with A3B	fold change mutaton rate / fold change in A3B expression
NA	wild-type	No plasmid / no A3B	1.50216e-05	1.05303e-05	6.07968e-06	NA	NA
YOR025W	hst3Δ	pSR-440 (A3B)	1.29291	0.110665	0.0638922	10.0671	7.78638
YCL016C	dcc1Δ	pSR-440 (A3B)	1.63986	0.244498	0.141161	7.39583	4.51004
YOL093W	trm10Δ	pSR-440 (A3B)	0.972716	0.125155	0.0722582	6.60174	6.78692
YER095W	rad51Δ	pSR-440 (A3B)	1.2194	0.215288	0.124297	6.51373	5.34176
YMR078C	ctf18Δ	pSR-440 (A3B)	0.936718	0.181529	0.104806	5.07668	5.41965
YCL060C	mrc1Δ	pSR-440 (A3B)	1.0572	0.107538	0.0620868	5.06809	4.79387
YHR191C	ctf8Δ	pSR-440 (A3B)	0.612192	0.0624952	0.0360816	5.01074	8.18491
YML021C	ung1Δ	pSR-440 (A3B)	0.963601	0.095294	0.055018	4.99524	5.18393
YGL163C	rad54Δ	pSR-440 (A3B)	0.807003	0.152493	0.0880417	4.57082	5.66395
YOR080W	dia2Δ	pSR-440 (A3B)	0.883571	0.131485	0.075913	4.53837	5.1364
YIR002C	mph1Δ	pSR-440 (A3B)	0.810358	0.0569143	0.0328595	4.43665	5.47492
YDR078C	shu2Δ	pSR-440 (A3B)	1.2215	0.0868762	0.050158	3.91324	3.20364
YDR076W	rad55Δ	pSR-440 (A3B)	0.849825	0.088495	0.0510926	3.87762	4.56285
YPL008W	chl1Δ	pSR-440 (A3B)	0.991849	0.0812111	0.0468872	3.83302	3.86452
YNL107W	yaf9Δ	pSR-440 (A3B)	0.542679	0.0683016	0.039434	3.46637	6.38752
YPL077C	YPL077CΔ	pSR-440 (A3B)	0.839882	0.129999	0.0750547	3.46616	4.12696
YOL047C	lds2Δ	pSR-440 (A3B)	1.89092	0.320211	0.184874	3.08794	1.63304
YLR288C	mec3Δ	pSR-440 (A3B)	1.17372	0.0777457	0.0448865	3.05317	2.60127
YNL273W	tof1Δ	pSR-440 (A3B)	1.53233	0.128774	0.0743476	3.01544	1.96788
YKL113C	rad27Δ	pSR-440 (A3B)	NA	NA	NA	3.01445	NA
YMR086W	seg1Δ	pSR-440 (A3B)	1.15821	0.182425	0.105323	2.92186	2.52273
YHL006C	shu1Δ	pSR-440 (A3B)	1.04506	0.088558	0.051129	2.85959	2.73631
YIL132C	csm2Δ	pSR-440 (A3B)	1.40822	0.132757	0.0766472	2.84372	2.01938
YPL141C	frk1Δ	pSR-440 (A3B)	1.32656	0.173335	0.100075	2.65895	2.0044
YPR068C	hos1Δ	pSR-440 (A3B)	1.31873	0.105253	0.0607677	2.59375	1.96686
YOL054W	psh1Δ	pSR-440 (A3B)	2.32986	0.138921	0.080206	2.22083	0.953204
YHR154W	rtt107Δ	pSR-440 (A3B)	1.17314	0.304764	0.175955	2.12823	1.81413
YPL194W	ddc1Δ	pSR-440 (A3B)	0.721047	0.104918	0.0605746	2.08218	2.88772
YHR041C	srb2Δ	pSR-440 (A3B)	4.72062	0.505633	0.291927	2.05129	0.434539
YOL068C	hst1Δ	pSR-440 (A3B)	0.776075	0.0351231	0.0202783	1.75	2.25494
NA	wild-type	pSR-440 (A3B)	1	0.134583	0.0777018	1	1

## Sheet: Sheet3
Supplemental Table S3: RTq-PCR measurement of A3B expression in various yeast strains with single gene deletions.
