# Supplementary material for: Genetic inhibitors of APOBEC3B-induced mutagenesis
Source: Genome Res. 2023 Sep;33(9):1568–81. doi: 10.1101/gr.277430.122 (PMC10620048; doi:10.1101/gr.277430.122)
Supplement: Supplement 5 [file Supplemental_Table_S5.xlsx]

## Sheet: All Mutations
Isolate	Gene Deletion	Reference	Minimum	Maximum	Length	Reference Nucleotide(s)	Variant Nucleotide(s)	Coverage	Variant Type	Variant Raw Frequency	Variant Frequency	Mutations Per Isolate	Distance Between Mutations in Isolate	Context	Mutated Motif	APOBEC Motif
age2_01	age2Δ	CAN1	789	789	1	G	A	10	SNP	10	1	1		CCAGTTGGATTCCGTTATTGGAGAAACCCAGGTGCCTGGGG	GGA	1
age2_02	age2Δ	CAN1	1175	1175	1	C	T	8	SNP	7	0.875	1		CATTATTTCTGCCGCAAATTCAAATATTTACGTTGGTTCCC	TCA	1
age2_03	age2Δ	CAN1	577	577	1	C	T	11	SNP	11	1	1		GTGTAGTTGGCCAAGTCATTCAATTTTGGACGTACAAAGTT	TCA	1
age2_04	age2Δ	CAN1	892	892	1	C	T	13	SNP	13	1	1		TTAACGCTGCCTTCACATTTCAAGGTACTGAACTAGTTGGT	TCA	1
age2_05	age2Δ	CAN1	1537	1537	1	C	T	18	SNP	18	1	1		TGACGATCATTATCATTATTCAAGGTTTCACGGCTTTTGCA	TCA	1
age2_06	age2Δ	CAN1	577	577	1	C	T	13	SNP	13	1	1		GTGTAGTTGGCCAAGTCATTCAATTTTGGACGTACAAAGTT	TCA	1
age2_07	age2Δ	CAN1	824	824	1	C	T	18	SNP	18	1	2	389	CTGGGGTCCAGGTATAATATCTAAGGATAAAAACGAAGGGA	TCT	1
age2_07	age2Δ	CAN1	1214	1214	1	C	G	18	SNP	18	1	2		CCGTATTTTATTTGGTCTATCAAAGAACAAGTTGGCTCCTA	TCA	1
age2_08	age2Δ	CAN1	452	452	1	C	T	26	SNP	26	1	1		TACATTCACCCCTGTTACATCCTCTTTCACAGTGTTCTCAC	TCC	1
age2_09	age2Δ	CAN1	699	699	1	C	A	9	SNP	5	0.556	2	514	GAGTTCTGGGTCGCTTCCATCAAAGTTTTAGCCATTATCGG	TCA	1
age2_09	age2Δ	CAN1	1214	1214	1	C	G	9	SNP	5	0.556	2		CCGTATTTTATTTGGTCTATCAAAGAACAAGTTGGCTCCTA	TCA	1
age2_10	age2Δ	CAN1	901	901	1	G	A	18	SNP	18	1	1		CCTTCACATTTCAAGGTACTGAACTAGTTGGTATCACTGCT	TGA	1
age2_11	age2Δ	CAN1	452	452	1	C	T	9	SNP	9	1	1		TACATTCACCCCTGTTACATCCTCTTTCACAGTGTTCTCAC	TCC	1
age2_12	age2Δ	CAN1	1214	1214	1	C	T	14	SNP	12	0.857	1		CCGTATTTTATTTGGTCTATCAAAGAACAAGTTGGCTCCTA	TCA	1
age2_13	age2Δ	CAN1	1214	1214	1	C	T	17	SNP	17	1	1		CCGTATTTTATTTGGTCTATCAAAGAACAAGTTGGCTCCTA	TCA	1
age2_14	age2Δ	CAN1	612	612	1	G	A	20	SNP	20	1	1		AAAGTTCCACTGGCGGCATGGATTAGTATTTTTTGGGTAAT	GGA	1
age2_15	age2Δ	CAN1	1163	1163	1	C	T	13	SNP	13	1	1		TATCTTAACAACCATTATTTCTGCCGCAAATTCAAATATTT	TCT	1
age2_16	age2Δ	CAN1	612	612	1	G	A	12	SNP	12	1	1		AAAGTTCCACTGGCGGCATGGATTAGTATTTTTTGGGTAAT	GGA	1
age2_17	age2Δ	CAN1	612	612	1	G	A	15	SNP	14	0.933	1		AAAGTTCCACTGGCGGCATGGATTAGTATTTTTTGGGTAAT	GGA	1
age2_18	age2Δ	CAN1	452	452	1	C	T	17	SNP	17	1	1		TACATTCACCCCTGTTACATCCTCTTTCACAGTGTTCTCAC	TCC	1
age2_19	age2Δ	CAN1	452	452	1	C	T	9	SNP	9	1	1		TACATTCACCCCTGTTACATCCTCTTTCACAGTGTTCTCAC	TCC	1
age2_20	age2Δ	CAN1	1163	1163	1	C	T	16	SNP	16	1	1		TATCTTAACAACCATTATTTCTGCCGCAAATTCAAATATTT	TCT	1
age2_21	age2Δ	CAN1	1214	1214	1	C	G	10	SNP	9	0.9	1		CCGTATTTTATTTGGTCTATCAAAGAACAAGTTGGCTCCTA	TCA	1
age2_22	age2Δ	CAN1	612	612	1	G	A	17	SNP	16	0.941	1		AAAGTTCCACTGGCGGCATGGATTAGTATTTTTTGGGTAAT	GGA	1
age2_23	age2Δ	CAN1	452	452	1	C	T	15	SNP	15	1	1		TACATTCACCCCTGTTACATCCTCTTTCACAGTGTTCTCAC	TCC	1
age2_24	age2Δ	CAN1	679	679	1	G	A	14	SNP	13	0.929	1		TCAAATATTACGGTGAATTCGAGTTCTGGGTCGCTTCCATC	CGA	1
age2_25	age2Δ	CAN1	679	679	1	G	A	10	SNP	10	1	1		TCAAATATTACGGTGAATTCGAGTTCTGGGTCGCTTCCATC	CGA	1
age2_26	age2Δ	CAN1	925	925	1	G	A	11	SNP	11	1	1		TAGTTGGTATCACTGCTGGTGAAGCTGCAAACCCCAGAAAA	TGA	1
age2_27	age2Δ	CAN1	963	963	1	C	A	7	SNP	7	1	2	250	AAATCCGTTCCAAGAGCCATCAAAAAAGTTGTTTTCCGTAT	TCA	1
age2_27	age2Δ	CAN1	1214	1214	1	C	G	7	SNP	7	1	2		CCGTATTTTATTTGGTCTATCAAAGAACAAGTTGGCTCCTA	TCA	1
age2_28	age2Δ	CAN1	1537	1537	1	C	T	19	SNP	17	0.895	1		TGACGATCATTATCATTATTCAAGGTTTCACGGCTTTTGCA	TCA	1
age2_29	age2Δ	CAN1	807	807	1	G	A	16	SNP	16	1	1		TGGAGAAACCCAGGTGCCTGGGGTCCAGGTATAATATCTAA	GGG	0
age2_30	age2Δ	CAN1	374	374	1	C	G	14	SNP	14	1	1		CCCAGTGGGCGCTCTTATATCATATTTATTTATGGGTTCTT	TCA	1
age2_31	age2Δ	CAN1	113	113	1	C	G	23	SNP	23	1	1		AACACACCACAGACGTGGGTCAATACCATTAAAAGATGAGA	TCA	1
age2_32	age2Δ	CAN1	1214	1214	1	C	T	18	SNP	17	0.944	1		CCGTATTTTATTTGGTCTATCAAAGAACAAGTTGGCTCCTA	TCA	1
age2_33	age2Δ	CAN1	455	455	1	C	T	22	SNP	22	1	1		ATTCACCCCTGTTACATCCTCTTTCACAGTGTTCTCACAAA	TCT	1
age2_34	age2Δ	CAN1	550	550	1	G	A	35	SNP	34	0.971	1		GGGCAATCACTTTTGCCCTGGAACTTAGTGTAGTTGGCCAA	GGA	1
age2_35	age2Δ	CAN1	1537	1537	1	C	T	35	SNP	35	1	1		TGACGATCATTATCATTATTCAAGGTTTCACGGCTTTTGCA	TCA	1
age2_36	age2Δ	CAN1	1633	1633	1	C	T	12	SNP	10	0.833	1		TAGCTGTTTGGATCTTATTTCAATGCATATTCAGATGCAGA	TCA	1
age2_37	age2Δ	CAN1	577	577	1	C	T	42	SNP	42	1	1		GTGTAGTTGGCCAAGTCATTCAATTTTGGACGTACAAAGTT	TCA	1
age2_38	age2Δ	CAN1	352	352	1	G	A	22	SNP	22	1	1		CCACACCTCTGACCAACGCCGGCCCAGTGGGCGCTCTTATA	CGG	0
age2_39	age2Δ	CAN1	979	979	1	C	T	23	SNP	23	1	1		CCATCAAAAAAGTTGTTTTCCGTATCTTAACCTTCTACATT	CCG	0
age2_40	age2Δ	CAN1	1633	1633	1	C	T	30	SNP	30	1	1		TAGCTGTTTGGATCTTATTTCAATGCATATTCAGATGCAGA	TCA	1
age2_41	age2Δ	CAN1	925	925	1	G	A	33	SNP	30	0.909	1		TAGTTGGTATCACTGCTGGTGAAGCTGCAAACCCCAGAAAA	TGA	1
age2_42	age2Δ	CAN1	806	806	1	G	A	26	SNP	26	1	1		TTGGAGAAACCCAGGTGCCTGGGGTCCAGGTATAATATCTA	TGG	0
age2_43	age2Δ	CAN1	577	577	1	C	T	19	SNP	17	0.895	1		GTGTAGTTGGCCAAGTCATTCAATTTTGGACGTACAAAGTT	TCA	1
age2_44	age2Δ	CAN1	527	527	1	C	T	18	SNP	17	0.944	1		TGGTTACATGTATTGGTTTTCTTGGGCAATCACTTTTGCCC	TCT	1
age2_45	age2Δ	CAN1	1214	1214	1	C	G	27	SNP	27	1	1		CCGTATTTTATTTGGTCTATCAAAGAACAAGTTGGCTCCTA	TCA	1
age2_46	age2Δ	CAN1	1537	1537	1	C	T	24	SNP	23	0.958	1		TGACGATCATTATCATTATTCAAGGTTTCACGGCTTTTGCA	TCA	1
age2_47	age2Δ	CAN1	1623	1623	1	G	A	14	SNP	12	0.857	1		TTCCTGTTCTTAGCTGTTTGGATCTTATTTCAATGCATATT	GGA	1
arp6_11	arp6Δ	CAN1	699	699	1	C	G	2	SNP	2	1	2	514	GAGTTCTGGGTCGCTTCCATCAAAGTTTTAGCCATTATCGG	TCA	1
arp6_11	arp6Δ	CAN1	1214	1214	1	C	G	2	SNP	2	1	2		CCGTATTTTATTTGGTCTATCAAAGAACAAGTTGGCTCCTA	TCA	1
arp6_13	arp6Δ	CAN1	1633	1633	1	C	T	10	SNP	3	0.3	1		TAGCTGTTTGGATCTTATTTCAATGCATATTCAGATGCAGA	TCA	1
arp6_17	arp6Δ	CAN1	374	374	1	C	A	17	SNP	5	0.294	1		CCCAGTGGGCGCTCTTATATCATATTTATTTATGGGTTCTT	TCA	1
arp6_19	arp6Δ	CAN1	550	550	1	G	A	9	SNP	4	0.444	1		GGGCAATCACTTTTGCCCTGGAACTTAGTGTAGTTGGCCAA	GGA	1
arp6_20	arp6Δ	CAN1	550	550	1	G	A	9	SNP	3	0.333	1		GGGCAATCACTTTTGCCCTGGAACTTAGTGTAGTTGGCCAA	GGA	1
arp6_21	arp6Δ	CAN1	1284	1285	1	C	DEL	7	Deletion	4	0.571	1		GTTCCATACATTGCAGTTTTCGTTACTGCTGCATTTGGCGC	TCG	1
arp6_23	arp6Δ	CAN1	1378	1378	1	G	A	13	SNP	6	0.462	1		TAAATATCACTGGTGTTGCAGGCTTTTTTGCATGGTTATTT	AGG	0
arp6_24	arp6Δ	CAN1	1193	1193	1	C	T	12	SNP	5	0.417	1		TTCAAATATTTACGTTGGTTCCCGTATTTTATTTGGTCTAT	TCC	1
arp6_26	arp6Δ	CAN1	1623	1623	1	G	A	3	SNP	2	0.667	1		TTCCTGTTCTTAGCTGTTTGGATCTTATTTCAATGCATATT	GGA	1
arp6_29	arp6Δ	CAN1	452	452	1	C	T	8	SNP	3	0.375	1		TACATTCACCCCTGTTACATCCTCTTTCACAGTGTTCTCAC	TCC	1
arp6_3	arp6Δ	CAN1	530	530	1	G	A	21	SNP	12	0.571	1		TTACATGTATTGGTTTTCTTGGGCAATCACTTTTGCCCTGG	TGG	0
arp6_33	arp6Δ	CAN1	1195	1196	1	C	DEL	7	Deletion	4	0.571	1		CAAATATTTACGTTGGTTCCCGTATTTTATTTGGTCTATCA	CCG	0
arp6_36	arp6Δ	CAN1	922	922	1	G	A	13	SNP	4	0.308	1		AACTAGTTGGTATCACTGCTGGTGAAGCTGCAAACCCCAGA	TGG	0
arp6_37	arp6Δ	CAN1	296	297	1	G	DEL	22	Deletion	10	0.455	1		TATTGGTATGATTGCCCTTGGTGGTACTATTGGTACAGGTC	GGT	0
arp6_38	arp6Δ	CAN1	625	626	1	T	DEL	7	Deletion	4	0.571	1		CGGCATGGATTAGTATTTTTTGGGTAATTATCACAATAATG	TTG	0
arp6_42	arp6Δ	CAN1	113	113	1	C	G	5	SNP	3	0.6	1		AACACACCACAGACGTGGGTCAATACCATTAAAAGATGAGA	TCA	1
arp6_45	arp6Δ	CAN1	612	612	1	G	A	16	SNP	4	0.25	1		AAAGTTCCACTGGCGGCATGGATTAGTATTTTTTGGGTAAT	GGA	1
arp6_47	arp6Δ	CAN1	1175	1175	1	C	T	13	SNP	6	0.462	1		CATTATTTCTGCCGCAAATTCAAATATTTACGTTGGTTCCC	TCA	1
arp6_48	arp6Δ	CAN1	1214	1214	1	C	T	4	SNP	2	0.5	1		CCGTATTTTATTTGGTCTATCAAAGAACAAGTTGGCTCCTA	TCA	1
arp6_5	arp6Δ	CAN1	295	295	1	G	C	21	SNP	12	0.571	1		ATATTGGTATGATTGCCCTTGGTGGTACTATTGGTACAGGT	TGG	0
arp6_6	arp6Δ	CAN1	625	626	1	T	DEL	6	Deletion	4	0.667	1		CGGCATGGATTAGTATTTTTTGGGTAATTATCACAATAATG	TTG	0
arp6_7	arp6Δ	CAN1	452	452	1	C	T	10	SNP	4	0.4	1		TACATTCACCCCTGTTACATCCTCTTTCACAGTGTTCTCAC	TCC	1
arp6_8	arp6Δ	CAN1	452	452	1	C	T	7	SNP	2	0.286	1		TACATTCACCCCTGTTACATCCTCTTTCACAGTGTTCTCAC	TCC	1
arp6_9	arp6Δ	CAN1	679	679	1	G	A	3	SNP	2	0.667	1		TCAAATATTACGGTGAATTCGAGTTCTGGGTCGCTTCCATC	CGA	1
asf1_10	asf1Δ	CAN1	1004	1004	1	C	T	18	SNP	18	1	1		CTTAACCTTCTACATTGGCTCTCTATTATTCATTGGACTTT	TCT	1
asf1_11	asf1Δ	CAN1	1487	1487	1	C	T	9	SNP	9	1	1		ATTTAAAGCTAAATTAATGCCCGGCTTGGCTTATTATGCGG	CCC	0
asf1_12	asf1Δ	CAN1	1214	1214	1	C	G	14	SNP	13	0.929	1		CCGTATTTTATTTGGTCTATCAAAGAACAAGTTGGCTCCTA	TCA	1
asf1_13	asf1Δ	CAN1	1175	1175	1	C	G	10	SNP	9	0.9	1		CATTATTTCTGCCGCAAATTCAAATATTTACGTTGGTTCCC	TCA	1
asf1_14	asf1Δ	CAN1	455	455	1	C	T	3	SNP	3	1	1		ATTCACCCCTGTTACATCCTCTTTCACAGTGTTCTCACAAA	TCT	1
asf1_15	asf1Δ	CAN1	452	452	1	C	T	8	SNP	8	1	1		TACATTCACCCCTGTTACATCCTCTTTCACAGTGTTCTCAC	TCC	1
asf1_16	asf1Δ	CAN1	452	452	1	C	T	2	SNP	2	1	1		TACATTCACCCCTGTTACATCCTCTTTCACAGTGTTCTCAC	TCC	1
asf1_17	asf1Δ	CAN1	979	979	1	C	T	5	SNP	4	0.8	1		CCATCAAAAAAGTTGTTTTCCGTATCTTAACCTTCTACATT	CCG	0
asf1_19	asf1Δ	CAN1	1175	1175	1	C	T	2	SNP	2	1	1		CATTATTTCTGCCGCAAATTCAAATATTTACGTTGGTTCCC	TCA	1
asf1_2	asf1Δ	CAN1	1214	1214	1	C	G	6	SNP	6	1	1		CCGTATTTTATTTGGTCTATCAAAGAACAAGTTGGCTCCTA	TCA	1
asf1_20	asf1Δ	CAN1	788	788	1	G	A	10	SNP	9	0.9	1		CCCAGTTGGATTCCGTTATTGGAGAAACCCAGGTGCCTGGG	TGG	0
asf1_21	asf1Δ	CAN1	910	910	1	G	C	8	SNP	8	1	1		TTCAAGGTACTGAACTAGTTGGTATCACTGCTGGTGAAGCT	TGG	0
asf1_23	asf1Δ	CAN1	577	577	1	C	T	10	SNP	10	1	1		GTGTAGTTGGCCAAGTCATTCAATTTTGGACGTACAAAGTT	TCA	1
asf1_24	asf1Δ	CAN1	938	938	1	C	G	2	SNP	2	1	1		TGCTGGTGAAGCTGCAAACCCCAGAAAATCCGTTCCAAGAG	CCC	0
asf1_25	asf1Δ	CAN1	612	612	1	G	A	13	SNP	13	1	1		AAAGTTCCACTGGCGGCATGGATTAGTATTTTTTGGGTAAT	GGA	1
asf1_27	asf1Δ	CAN1	636	636	1	C	T	10	SNP	10	1	2	577	AGTATTTTTTGGGTAATTATCACAATAATGAACTTGTTCCC	TCA	1
asf1_27	asf1Δ	CAN1	1214	1214	1	C	T	10	SNP	10	1	2		CCGTATTTTATTTGGTCTATCAAAGAACAAGTTGGCTCCTA	TCA	1
asf1_28	asf1Δ	CAN1	1487	1487	1	C	T	11	SNP	11	1	1		ATTTAAAGCTAAATTAATGCCCGGCTTGGCTTATTATGCGG	CCC	0
asf1_29	asf1Δ	CAN1	455	455	1	C	T	3	SNP	3	1	2	784	ATTCACCCCTGTTACATCCTCTTTCACAGTGTTCTCACAAA	TCT	1
asf1_29	asf1Δ	CAN1	1240	1240	1	C	T	3	SNP	3	1	2		ACAAGTTGGCTCCTAAATTCCTGTCAAGGACCACCAAAGGT	CCT	0
asf1_3	asf1Δ	CAN1	455	455	1	C	T	10	SNP	10	1	1		ATTCACCCCTGTTACATCCTCTTTCACAGTGTTCTCACAAA	TCT	1
asf1_30	asf1Δ	CAN1	568	568	1	C	T	14	SNP	14	1	1		TGGAACTTAGTGTAGTTGGCCAAGTCATTCAATTTTGGACG	CCA	0
asf1_31	asf1Δ	CAN1	901	901	1	G	A	8	SNP	8	1	1		CCTTCACATTTCAAGGTACTGAACTAGTTGGTATCACTGCT	TGA	1
asf1_32	asf1Δ	CAN1	979	980	1	C	DEL	6	Deletion	6	1	1		CCATCAAAAAAGTTGTTTTCCGTATCTTAACCTTCTACATT	CCG	0
asf1_33	asf1Δ	CAN1	1214	1214	1	C	T	12	SNP	12	1	1		CCGTATTTTATTTGGTCTATCAAAGAACAAGTTGGCTCCTA	TCA	1
asf1_34	asf1Δ	CAN1	585	585	1	G	A	5	SNP	4	0.8	1		GGCCAAGTCATTCAATTTTGGACGTACAAAGTTCCACTGGC	GGA	1
asf1_35	asf1Δ	CAN1	1214	1214	1	C	T	9	SNP	9	1	1		CCGTATTTTATTTGGTCTATCAAAGAACAAGTTGGCTCCTA	TCA	1
asf1_36	asf1Δ	CAN1	374	374	1	C	G	19	SNP	19	1	1		CCCAGTGGGCGCTCTTATATCATATTTATTTATGGGTTCTT	TCA	1
asf1_37	asf1Δ	CAN1	1195	1195	1	C	T	13	SNP	13	1	1		CAAATATTTACGTTGGTTCCCGTATTTTATTTGGTCTATCA	CCG	0
asf1_38	asf1Δ	CAN1	925	925	1	G	A	16	SNP	16	1	1		TAGTTGGTATCACTGCTGGTGAAGCTGCAAACCCCAGAAAA	TGA	1
asf1_39	asf1Δ	CAN1	979	980	1	C	DEL	9	Deletion	8	0.889	1		CCATCAAAAAAGTTGTTTTCCGTATCTTAACCTTCTACATT	CCG	0
asf1_4	asf1Δ	CAN1	1244	1244	1	C	G	6	SNP	6	1	1		GTTGGCTCCTAAATTCCTGTCAAGGACCACCAAAGGTGGTG	TCA	1
asf1_40	asf1Δ	CAN1	374	374	1	C	G	3	SNP	3	1	1		CCCAGTGGGCGCTCTTATATCATATTTATTTATGGGTTCTT	TCA	1
asf1_42	asf1Δ	CAN1	1214	1214	1	C	G	10	SNP	10	1	1		CCGTATTTTATTTGGTCTATCAAAGAACAAGTTGGCTCCTA	TCA	1
asf1_43	asf1Δ	CAN1	892	892	1	C	T	22	SNP	22	1	1		TTAACGCTGCCTTCACATTTCAAGGTACTGAACTAGTTGGT	TCA	1
asf1_44	asf1Δ	CAN1	1403	1403	1	C	G	11	SNP	11	1	1		TTTTGCATGGTTATTTATCTCAATCTCGCACATCAGATTTA	TCA	1
asf1_45	asf1Δ	CAN1	789	789	1	G	A	18	SNP	18	1	1		CCAGTTGGATTCCGTTATTGGAGAAACCCAGGTGCCTGGGG	GGA	1
asf1_6	asf1Δ	CAN1	34	34	1	G	T	5	SNP	4	0.8	2	6	AAGAAGACGCCGACATAGAGGAGAAGCATATGTACAATGAG	GGA	1
asf1_6	asf1Δ	CAN1	41	41	1	A	G	5	SNP	4	0.8	2		CGCCGACATAGAGGAGAAGCATATGTACAATGAGCCGGTCA	CAT	0
asf1_7	asf1Δ	CAN1	1214	1214	1	C	T	3	SNP	2	0.667	1		CCGTATTTTATTTGGTCTATCAAAGAACAAGTTGGCTCCTA	TCA	1
chl1_101	chl1Δ	CAN1	1214	1214	1	C	G	18	SNP	18	1	1		CCGTATTTTATTTGGTCTATCAAAGAACAAGTTGGCTCCTA	TCA	1
chl1_102	chl1Δ	CAN1	527	527	1	C	T	27	SNP	25	0.926	1		TGGTTACATGTATTGGTTTTCTTGGGCAATCACTTTTGCCC	TCT	1
chl1_103	chl1Δ	CAN1	724	725	1	C	DEL	15	Deletion	15	1	1		TTTTAGCCATTATCGGGTTTCTAATATACTGTTTTTGTATG	TCT	1
chl1_104	chl1Δ	CAN1	1193	1193	1	C	T	13	SNP	13	1	1		TTCAAATATTTACGTTGGTTCCCGTATTTTATTTGGTCTAT	TCC	1
chl1_105	chl1Δ	CAN1	1633	1633	1	C	T	16	SNP	16	1	1		TAGCTGTTTGGATCTTATTTCAATGCATATTCAGATGCAGA	TCA	1
chl1_106	chl1Δ	CAN1	577	577	1	C	T	30	SNP	30	1	1		GTGTAGTTGGCCAAGTCATTCAATTTTGGACGTACAAAGTT	TCA	1
chl1_107	chl1Δ	CAN1	1214	1214	1	C	G	17	SNP	17	1	1		CCGTATTTTATTTGGTCTATCAAAGAACAAGTTGGCTCCTA	TCA	1
chl1_108	chl1Δ	CAN1	584	584	1	G	A	27	SNP	27	1	1		TGGCCAAGTCATTCAATTTTGGACGTACAAAGTTCCACTGG	TGG	0
chl1_109	chl1Δ	CAN1	368	368	1	T	A	11	SNP	9	0.818	4	5	CGCCGGCCCAGTGGGCGCTCTTATATCATATTTATTTATGG	CTT	0
chl1_109	chl1Δ	CAN1	374	374	1	C	G	11	SNP	9	0.818	4	1212	CCCAGTGGGCGCTCTTATATCATATTTATTTATGGGTTCTT	TCA	1
chl1_109	chl1Δ	CAN1	1587	1587	1	C	G	11	SNP	9	0.818	4	100	AATGGTGTTAGCTTTGCTGCCGCCTATATCTCTGTTTTCCT	CCG	0
chl1_109	chl1Δ	CAN1	1688	1688	1	C	G	11	SNP	10	0.909	4		TGGAGATGTCGACATCGATTCCGATAGAAGAGACATTGAGG	TCC	1
chl1_11	chl1Δ	CAN1	11	11	1	C	G	7	SNP	3	0.429	1		ATGACAAATTCAAAAGAAGACGCCGACATAG	TCA	1
chl1_110	chl1Δ	CAN1	11	11	1	C	G	11	SNP	11	1	3	648	ATGACAAATTCAAAAGAAGACGCCGACATAG	TCA	1
chl1_110	chl1Δ	CAN1	660	660	1	C	G	11	SNP	11	1	3	38	ATAATGAACTTGTTCCCTGTCAAATATTACGGTGAATTCGA	TCA	1
chl1_110	chl1Δ	CAN1	699	699	1	C	G	11	SNP	11	1	3		GAGTTCTGGGTCGCTTCCATCAAAGTTTTAGCCATTATCGG	TCA	1
chl1_111	chl1Δ	CAN1	612	612	1	G	A	13	SNP	13	1	1		AAAGTTCCACTGGCGGCATGGATTAGTATTTTTTGGGTAAT	GGA	1
chl1_112	chl1Δ	CAN1	455	455	1	C	T	8	SNP	8	1	1		ATTCACCCCTGTTACATCCTCTTTCACAGTGTTCTCACAAA	TCT	1
chl1_113	chl1Δ	CAN1	577	577	1	C	T	6	SNP	5	0.833	1		GTGTAGTTGGCCAAGTCATTCAATTTTGGACGTACAAAGTT	TCA	1
chl1_114	chl1Δ	CAN1	424	424	1	G	A	19	SNP	19	1	1		CTGTCACGCAGTCCTTGGGTGAAATGGCTACATTCACCCCT	TGA	1
chl1_115	chl1Δ	CAN1	1403	1403	1	C	G	18	SNP	18	1	1		TTTTGCATGGTTATTTATCTCAATCTCGCACATCAGATTTA	TCA	1
chl1_116	chl1Δ	CAN1	374	374	1	C	G	22	SNP	22	1	1		CCCAGTGGGCGCTCTTATATCATATTTATTTATGGGTTCTT	TCA	1
chl1_117	chl1Δ	CAN1	1403	1403	1	C	G	10	SNP	10	1	1		TTTTGCATGGTTATTTATCTCAATCTCGCACATCAGATTTA	TCA	1
chl1_14	chl1Δ	CAN1	1175	1175	1	C	G	10	SNP	4	0.4	1		CATTATTTCTGCCGCAAATTCAAATATTTACGTTGGTTCCC	TCA	1
chl1_15	chl1Δ	CAN1	1175	1175	1	C	G	16	SNP	6	0.375	1		CATTATTTCTGCCGCAAATTCAAATATTTACGTTGGTTCCC	TCA	1
chl1_16	chl1Δ	CAN1	1214	1214	1	C	T	17	SNP	9	0.529	1		CCGTATTTTATTTGGTCTATCAAAGAACAAGTTGGCTCCTA	TCA	1
chl1_17	chl1Δ	CAN1	901	901	1	G	A	11	SNP	4	0.364	1		CCTTCACATTTCAAGGTACTGAACTAGTTGGTATCACTGCT	TGA	1
chl1_20	chl1Δ	CAN1	1244	1244	1	C	G	8	SNP	2	0.25	1		GTTGGCTCCTAAATTCCTGTCAAGGACCACCAAAGGTGGTG	TCA	1
chl1_23	chl1Δ	CAN1	1175	1175	1	C	G	8	SNP	4	0.5	1		CATTATTTCTGCCGCAAATTCAAATATTTACGTTGGTTCCC	TCA	1
chl1_24	chl1Δ	CAN1	1244	1244	1	C	G	25	SNP	8	0.32	1		GTTGGCTCCTAAATTCCTGTCAAGGACCACCAAAGGTGGTG	TCA	1
chl1_26	chl1Δ	CAN1	1244	1244	1	C	G	7	SNP	3	0.429	1		GTTGGCTCCTAAATTCCTGTCAAGGACCACCAAAGGTGGTG	TCA	1
chl1_27	chl1Δ	CAN1	1244	1244	1	C	G	22	SNP	12	0.545	1		GTTGGCTCCTAAATTCCTGTCAAGGACCACCAAAGGTGGTG	TCA	1
chl1_28	chl1Δ	CAN1	1214	1214	1	C	G	14	SNP	10	0.714	1		CCGTATTTTATTTGGTCTATCAAAGAACAAGTTGGCTCCTA	TCA	1
chl1_29	chl1Δ	CAN1	1214	1214	1	C	G	14	SNP	7	0.5	1		CCGTATTTTATTTGGTCTATCAAAGAACAAGTTGGCTCCTA	TCA	1
chl1_3	chl1Δ	CAN1	679	679	1	G	A	22	SNP	7	0.318	1		TCAAATATTACGGTGAATTCGAGTTCTGGGTCGCTTCCATC	CGA	1
chl1_31	chl1Δ	CAN1	1244	1244	1	C	G	7	SNP	4	0.571	1		GTTGGCTCCTAAATTCCTGTCAAGGACCACCAAAGGTGGTG	TCA	1
chl1_33	chl1Δ	CAN1	1633	1633	1	C	T	44	SNP	17	0.386	1		TAGCTGTTTGGATCTTATTTCAATGCATATTCAGATGCAGA	TCA	1
chl1_34	chl1Δ	CAN1	577	577	1	C	T	19	SNP	5	0.263	1		GTGTAGTTGGCCAAGTCATTCAATTTTGGACGTACAAAGTT	TCA	1
chl1_35	chl1Δ	CAN1	679	679	1	G	A	27	SNP	7	0.259	1		TCAAATATTACGGTGAATTCGAGTTCTGGGTCGCTTCCATC	CGA	1
chl1_36	chl1Δ	CAN1	573	573	1	C	T	19	SNP	9	0.474	1		CTTAGTGTAGTTGGCCAAGTCATTCAATTTTGGACGTACAA	TCA	1
chl1_37	chl1Δ	CAN1	760	761	1	G	DEL	38	Deletion	13	0.342	1		GTATGGTTTGTGGTGCTGGGGTTACCGGCCCAGTTGGATTC	GGT	0
chl1_39	chl1Δ	CAN1	1175	1175	1	C	G	23	SNP	6	0.261	1		CATTATTTCTGCCGCAAATTCAAATATTTACGTTGGTTCCC	TCA	1
chl1_4	chl1Δ	CAN1	1214	1214	1	C	T	21	SNP	12	0.571	1		CCGTATTTTATTTGGTCTATCAAAGAACAAGTTGGCTCCTA	TCA	1
chl1_42	chl1Δ	CAN1	11	11	1	C	G	9	SNP	7	0.778	1		ATGACAAATTCAAAAGAAGACGCCGACATAG	TCA	1
chl1_43	chl1Δ	CAN1	1214	1214	1	C	G	10	SNP	3	0.3	1		CCGTATTTTATTTGGTCTATCAAAGAACAAGTTGGCTCCTA	TCA	1
chl1_44	chl1Δ	CAN1	1244	1244	1	C	G	17	SNP	9	0.529	1		GTTGGCTCCTAAATTCCTGTCAAGGACCACCAAAGGTGGTG	TCA	1
chl1_45	chl1Δ	CAN1	1175	1175	1	C	G	14	SNP	4	0.286	1		CATTATTTCTGCCGCAAATTCAAATATTTACGTTGGTTCCC	TCA	1
chl1_46	chl1Δ	CAN1	455	455	1	C	T	13	SNP	5	0.385	1		ATTCACCCCTGTTACATCCTCTTTCACAGTGTTCTCACAAA	TCT	1
chl1_47	chl1Δ	CAN1	1244	1244	1	C	G	11	SNP	7	0.636	1		GTTGGCTCCTAAATTCCTGTCAAGGACCACCAAAGGTGGTG	TCA	1
chl1_5	chl1Δ	CAN1	113	113	1	C	G	29	SNP	11	0.379	1		AACACACCACAGACGTGGGTCAATACCATTAAAAGATGAGA	TCA	1
chl1_7	chl1Δ	CAN1	11	11	1	C	G	18	SNP	8	0.444	1		ATGACAAATTCAAAAGAAGACGCCGACATAG	TCA	1
chl1_8	chl1Δ	CAN1	1244	1244	1	C	G	10	SNP	3	0.3	1		GTTGGCTCCTAAATTCCTGTCAAGGACCACCAAAGGTGGTG	TCA	1
chl1_9	chl1Δ	CAN1	1214	1214	1	C	G	12	SNP	5	0.417	1		CCGTATTTTATTTGGTCTATCAAAGAACAAGTTGGCTCCTA	TCA	1
csm2_1	csm2Δ	CAN1	1195	1195	1	C	T	15	SNP	5	0.333	1		CAAATATTTACGTTGGTTCCCGTATTTTATTTGGTCTATCA	CCG	0
csm2_10	csm2Δ	CAN1	1403	1403	1	C	G	9	SNP	7	0.778	1		TTTTGCATGGTTATTTATCTCAATCTCGCACATCAGATTTA	TCA	1
csm2_11	csm2Δ	CAN1	1244	1244	1	C	G	49	SNP	48	0.98	1		GTTGGCTCCTAAATTCCTGTCAAGGACCACCAAAGGTGGTG	TCA	1
csm2_13	csm2Δ	CAN1	584	584	1	G	A	67	SNP	66	0.985	1		TGGCCAAGTCATTCAATTTTGGACGTACAAAGTTCCACTGG	TGG	0
csm2_14	csm2Δ	CAN1	1175	1175	1	C	T	3	SNP	2	0.667	1		CATTATTTCTGCCGCAAATTCAAATATTTACGTTGGTTCCC	TCA	1
csm2_15	csm2Δ	CAN1	577	577	1	INS	T	2	Insertion	2	1	1		TGTAGTTGGCCAAGTCATTCAATTTTGGACGTACAAAGTT		0
csm2_16	csm2Δ	CAN1	1244	1244	1	C	G	4	SNP	2	0.5	1		GTTGGCTCCTAAATTCCTGTCAAGGACCACCAAAGGTGGTG	TCA	1
csm2_18	csm2Δ	CAN1	1214	1214	1	C	G	11	SNP	6	0.545	1		CCGTATTTTATTTGGTCTATCAAAGAACAAGTTGGCTCCTA	TCA	1
csm2_19	csm2Δ	CAN1	1175	1175	1	C	G	14	SNP	5	0.357	1		CATTATTTCTGCCGCAAATTCAAATATTTACGTTGGTTCCC	TCA	1
csm2_20	csm2Δ	CAN1	113	113	1	C	G	37	SNP	37	1	1		AACACACCACAGACGTGGGTCAATACCATTAAAAGATGAGA	TCA	1
csm2_21	csm2Δ	CAN1	1214	1214	1	C	G	16	SNP	4	0.25	1		CCGTATTTTATTTGGTCTATCAAAGAACAAGTTGGCTCCTA	TCA	1
csm2_22	csm2Δ	CAN1	113	113	1	C	G	6	SNP	6	1	1		AACACACCACAGACGTGGGTCAATACCATTAAAAGATGAGA	TCA	1
csm2_23	csm2Δ	CAN1	374	374	1	C	G	18	SNP	11	0.611	1		CCCAGTGGGCGCTCTTATATCATATTTATTTATGGGTTCTT	TCA	1
csm2_24	csm2Δ	CAN1	374	374	1	C	G	14	SNP	7	0.5	1		CCCAGTGGGCGCTCTTATATCATATTTATTTATGGGTTCTT	TCA	1
csm2_25	csm2Δ	CAN1	1214	1214	1	C	G	8	SNP	8	1	1		CCGTATTTTATTTGGTCTATCAAAGAACAAGTTGGCTCCTA	TCA	1
csm2_28	csm2Δ	CAN1	113	113	1	C	G	15	SNP	6	0.4	1		AACACACCACAGACGTGGGTCAATACCATTAAAAGATGAGA	TCA	1
csm2_29	csm2Δ	CAN1	1633	1633	1	C	T	8	SNP	4	0.5	1		TAGCTGTTTGGATCTTATTTCAATGCATATTCAGATGCAGA	TCA	1
csm2_3	csm2Δ	CAN1	11	11	1	C	G	5	SNP	2	0.4	1		ATGACAAATTCAAAAGAAGACGCCGACATAG	TCA	1
csm2_30	csm2Δ	CAN1	978	978	1	INS	T	4	Insertion	2	0.5	1		CCATCAAAAAAGTTGTTTTCCGTATCTTAACCTTCTACAT		0
csm2_37	csm2Δ	CAN1	973	973	1	G	T	6	SNP	2	0.333	1		CAAGAGCCATCAAAAAAGTTGTTTTCCGTATCTTAACCTTC	TGT	0
csm2_4	csm2Δ	CAN1	1214	1214	1	C	G	12	SNP	5	0.417	1		CCGTATTTTATTTGGTCTATCAAAGAACAAGTTGGCTCCTA	TCA	1
csm2_42	csm2Δ	CAN1	1403	1403	1	C	G	18	SNP	13	0.722	1		TTTTGCATGGTTATTTATCTCAATCTCGCACATCAGATTTA	TCA	1
csm2_43	csm2Δ	CAN1	1403	1403	1	C	G	8	SNP	4	0.5	1		TTTTGCATGGTTATTTATCTCAATCTCGCACATCAGATTTA	TCA	1
csm2_45	csm2Δ	CAN1	374	374	1	C	G	3	SNP	2	0.667	1		CCCAGTGGGCGCTCTTATATCATATTTATTTATGGGTTCTT	TCA	1
csm2_46	csm2Δ	CAN1	963	963	1	C	G	9	SNP	6	0.667	1		AAATCCGTTCCAAGAGCCATCAAAAAAGTTGTTTTCCGTAT	TCA	1
csm2_5	csm2Δ	CAN1	1175	1175	1	C	G	17	SNP	7	0.412	1		CATTATTTCTGCCGCAAATTCAAATATTTACGTTGGTTCCC	TCA	1
csm2_6	csm2Δ	CAN1	724	724	2	INS	TT	8	Insertion	2	0.25	2	0	TTTAGCCATTATCGGGTTTCTAATATACTGTTTTTGTATG		0
csm2_6	csm2Δ	CAN1	724	724	1	C	G	8	SNP	2	0.25	2		TTTTAGCCATTATCGGGTTTCTAATATACTGTTTTTGTATG	TCT	1
csm2_7	csm2Δ	CAN1	1152	1152	1	A	G	13	SNP	8	0.615	1		TTCAACGCTGTTATCTTAACAACCATTATTTCTGCCGCAAA	CAA	0
csm2_9	csm2Δ	CAN1	1606	1607	1	C	DEL	15	Deletion	10	0.667	1		CCGCCTATATCTCTGTTTTCCTGTTCTTAGCTGTTTGGATC	CCT	0
ctf18_1	ctf18Δ	CAN1	1623	1623	1	G	A	3	SNP	2	0.667	1		TTCCTGTTCTTAGCTGTTTGGATCTTATTTCAATGCATATT	GGA	1
ctf18_101	ctf18Δ	CAN1	1175	1175	1	C	T	10	SNP	9	0.9	1		CATTATTTCTGCCGCAAATTCAAATATTTACGTTGGTTCCC	TCA	1
ctf18_102	ctf18Δ	CAN1	577	577	1	C	T	3	SNP	2	0.667	1		GTGTAGTTGGCCAAGTCATTCAATTTTGGACGTACAAAGTT	TCA	1
ctf18_103	ctf18Δ	CAN1	679	679	1	G	A	7	SNP	6	0.857	1		TCAAATATTACGGTGAATTCGAGTTCTGGGTCGCTTCCATC	CGA	1
ctf18_104	ctf18Δ	CAN1	585	585	1	G	A	5	SNP	5	1	1		GGCCAAGTCATTCAATTTTGGACGTACAAAGTTCCACTGGC	GGA	1
ctf18_106	ctf18Δ	CAN1	11	11	1	C	G	12	SNP	9	0.75	1		ATGACAAATTCAAAAGAAGACGCCGACATAG	TCA	1
ctf18_107	ctf18Δ	CAN1	925	925	1	G	A	13	SNP	11	0.846	1		TAGTTGGTATCACTGCTGGTGAAGCTGCAAACCCCAGAAAA	TGA	1
ctf18_108	ctf18Δ	CAN1	1662	1662	1	G	A	20	SNP	19	0.95	1		TTCAGATGCAGATTTATTTGGAAGATTGGAGATGTCGACAT	GGA	1
ctf18_109	ctf18Δ	CAN1	1214	1214	1	C	T	15	SNP	14	0.933	1		CCGTATTTTATTTGGTCTATCAAAGAACAAGTTGGCTCCTA	TCA	1
ctf18_110	ctf18Δ	CAN1	612	612	1	G	A	21	SNP	21	1	1		AAAGTTCCACTGGCGGCATGGATTAGTATTTTTTGGGTAAT	GGA	1
ctf18_111	ctf18Δ	CAN1	1175	1175	1	C	T	9	SNP	9	1	1		CATTATTTCTGCCGCAAATTCAAATATTTACGTTGGTTCCC	TCA	1
ctf18_112	ctf18Δ	CAN1	1623	1623	1	G	A	13	SNP	13	1	1		TTCCTGTTCTTAGCTGTTTGGATCTTATTTCAATGCATATT	GGA	1
ctf18_113	ctf18Δ	CAN1	1347	1348	1	C	DEL	12	Deletion	11	0.917	1		ACTGGTGGTGACAAAGTTTTCGAATGGCTATTAAATATCAC	TCG	1
ctf18_114	ctf18Δ	CAN1	585	585	1	G	A	10	SNP	10	1	1		GGCCAAGTCATTCAATTTTGGACGTACAAAGTTCCACTGGC	GGA	1
ctf18_115	ctf18Δ	CAN1	1214	1214	1	C	G	22	SNP	21	0.955	1		CCGTATTTTATTTGGTCTATCAAAGAACAAGTTGGCTCCTA	TCA	1
ctf18_116	ctf18Δ	CAN1	612	612	1	G	A	21	SNP	20	0.952	1		AAAGTTCCACTGGCGGCATGGATTAGTATTTTTTGGGTAAT	GGA	1
ctf18_117	ctf18Δ	CAN1	925	925	1	G	A	13	SNP	13	1	1		TAGTTGGTATCACTGCTGGTGAAGCTGCAAACCCCAGAAAA	TGA	1
ctf18_118	ctf18Δ	CAN1	1633	1633	1	C	T	11	SNP	11	1	1		TAGCTGTTTGGATCTTATTTCAATGCATATTCAGATGCAGA	TCA	1
ctf18_119	ctf18Δ	CAN1	789	789	1	G	A	19	SNP	17	0.895	1		CCAGTTGGATTCCGTTATTGGAGAAACCCAGGTGCCTGGGG	GGA	1
ctf18_120	ctf18Δ	CAN1	789	789	1	G	A	23	SNP	22	0.957	1		CCAGTTGGATTCCGTTATTGGAGAAACCCAGGTGCCTGGGG	GGA	1
ctf18_121	ctf18Δ	CAN1	485	486	1	C	DEL	22	Deletion	16	0.727	1		GTTCTCACAAAGATTCCTTTCTCCAGCATTTGGTGCGGCCA	TCT	1
ctf18_123	ctf18Δ	CAN1	612	612	1	G	A	17	SNP	17	1	1		AAAGTTCCACTGGCGGCATGGATTAGTATTTTTTGGGTAAT	GGA	1
ctf18_15	ctf18Δ	CAN1	585	585	1	G	A	13	SNP	7	0.538	1		GGCCAAGTCATTCAATTTTGGACGTACAAAGTTCCACTGGC	GGA	1
ctf18_17	ctf18Δ	CAN1	1623	1623	1	G	A	20	SNP	12	0.6	1		TTCCTGTTCTTAGCTGTTTGGATCTTATTTCAATGCATATT	GGA	1
ctf18_20	ctf18Δ	CAN1	1244	1244	1	C	G	14	SNP	5	0.357	1		GTTGGCTCCTAAATTCCTGTCAAGGACCACCAAAGGTGGTG	TCA	1
ctf18_21	ctf18Δ	CAN1	627	627	1	G	A	12	SNP	7	0.583	1		GCATGGATTAGTATTTTTTGGGTAATTATCACAATAATGAA	GGG	0
ctf18_22	ctf18Δ	CAN1	627	627	1	G	A	7	SNP	3	0.429	1		GCATGGATTAGTATTTTTTGGGTAATTATCACAATAATGAA	GGG	0
ctf18_23	ctf18Δ	CAN1	585	585	1	G	A	12	SNP	6	0.5	1		GGCCAAGTCATTCAATTTTGGACGTACAAAGTTCCACTGGC	GGA	1
ctf18_24	ctf18Δ	CAN1	925	925	1	G	A	17	SNP	8	0.471	1		TAGTTGGTATCACTGCTGGTGAAGCTGCAAACCCCAGAAAA	TGA	1
ctf18_25	ctf18Δ	CAN1	679	679	1	G	A	21	SNP	13	0.619	1		TCAAATATTACGGTGAATTCGAGTTCTGGGTCGCTTCCATC	CGA	1
ctf18_26	ctf18Δ	CAN1	849	850	1	C	DEL	19	Deletion	12	0.632	1		GATAAAAACGAAGGGAGGTTCTTAGGTTGGGTTTCCTCTTT	TCT	1
ctf18_28	ctf18Δ	CAN1	1633	1633	1	C	T	38	SNP	18	0.474	1		TAGCTGTTTGGATCTTATTTCAATGCATATTCAGATGCAGA	TCA	1
ctf18_29	ctf18Δ	CAN1	1214	1214	1	C	G	17	SNP	9	0.529	1		CCGTATTTTATTTGGTCTATCAAAGAACAAGTTGGCTCCTA	TCA	1
ctf18_30	ctf18Δ	CAN1	724	725	1	C	DEL	19	Deletion	9	0.474	1		TTTTAGCCATTATCGGGTTTCTAATATACTGTTTTTGTATG	TCT	1
ctf18_32	ctf18Δ	CAN1	550	551	1	G	DEL	11	Deletion	7	0.636	1		GGGCAATCACTTTTGCCCTGGAACTTAGTGTAGTTGGCCAA	GGA	1
ctf18_34	ctf18Δ	CAN1	925	925	1	G	A	18	SNP	12	0.667	1		TAGTTGGTATCACTGCTGGTGAAGCTGCAAACCCCAGAAAA	TGA	1
ctf18_36	ctf18Δ	CAN1	113	113	1	C	G	21	SNP	12	0.571	1		AACACACCACAGACGTGGGTCAATACCATTAAAAGATGAGA	TCA	1
ctf18_37	ctf18Δ	CAN1	1214	1214	1	C	G	25	SNP	14	0.56	1		CCGTATTTTATTTGGTCTATCAAAGAACAAGTTGGCTCCTA	TCA	1
ctf18_38	ctf18Δ	CAN1	612	612	1	G	A	12	SNP	5	0.417	1		AAAGTTCCACTGGCGGCATGGATTAGTATTTTTTGGGTAAT	GGA	1
ctf18_39	ctf18Δ	CAN1	424	424	1	G	A	10	SNP	5	0.5	1		CTGTCACGCAGTCCTTGGGTGAAATGGCTACATTCACCCCT	TGA	1
ctf18_4	ctf18Δ	CAN1	612	612	1	G	A	6	SNP	4	0.667	1		AAAGTTCCACTGGCGGCATGGATTAGTATTTTTTGGGTAAT	GGA	1
ctf18_40	ctf18Δ	CAN1	679	679	1	G	A	18	SNP	7	0.389	1		TCAAATATTACGGTGAATTCGAGTTCTGGGTCGCTTCCATC	CGA	1
ctf18_41	ctf18Δ	CAN1	679	679	1	G	A	9	SNP	8	0.889	1		TCAAATATTACGGTGAATTCGAGTTCTGGGTCGCTTCCATC	CGA	1
ctf18_42	ctf18Δ	CAN1	424	424	1	G	A	10	SNP	4	0.4	1		CTGTCACGCAGTCCTTGGGTGAAATGGCTACATTCACCCCT	TGA	1
ctf18_43	ctf18Δ	CAN1	857	857	1	G	A	10	SNP	4	0.4	1		CGAAGGGAGGTTCTTAGGTTGGGTTTCCTCTTTGATTAACG	TGG	0
ctf18_44	ctf18Δ	CAN1	1623	1623	1	G	A	28	SNP	8	0.286	1		TTCCTGTTCTTAGCTGTTTGGATCTTATTTCAATGCATATT	GGA	1
ctf18_45	ctf18Δ	CAN1	455	455	1	C	T	24	SNP	6	0.333	1		ATTCACCCCTGTTACATCCTCTTTCACAGTGTTCTCACAAA	TCT	1
ctf18_46	ctf18Δ	CAN1	939	940	1	C	DEL	12	Deletion	6	0.5	1		GCTGGTGAAGCTGCAAACCCCAGAAAATCCGTTCCAAGAGC	CCA	0
ctf18_47	ctf18Δ	CAN1	925	925	1	G	A	24	SNP	7	0.292	1		TAGTTGGTATCACTGCTGGTGAAGCTGCAAACCCCAGAAAA	TGA	1
ctf18_48	ctf18Δ	CAN1	424	424	1	G	A	15	SNP	6	0.4	1		CTGTCACGCAGTCCTTGGGTGAAATGGCTACATTCACCCCT	TGA	1
ctf18_5	ctf18Δ	CAN1	1214	1214	1	C	G	13	SNP	6	0.462	1		CCGTATTTTATTTGGTCTATCAAAGAACAAGTTGGCTCCTA	TCA	1
ctf18_8	ctf18Δ	CAN1	1214	1214	1	C	G	5	SNP	2	0.4	1		CCGTATTTTATTTGGTCTATCAAAGAACAAGTTGGCTCCTA	TCA	1
ctf8_01	ctf8Δ	CAN1	374	374	1	C	G	104	SNP	104	1	1		CCCAGTGGGCGCTCTTATATCATATTTATTTATGGGTTCTT	TCA	1
ctf8_101	ctf8Δ	CAN1	550	550	1	G	A	62	SNP	61	0.984	1		GGGCAATCACTTTTGCCCTGGAACTTAGTGTAGTTGGCCAA	GGA	1
ctf8_102	ctf8Δ	CAN1	1623	1623	1	G	A	63	SNP	56	0.889	1		TTCCTGTTCTTAGCTGTTTGGATCTTATTTCAATGCATATT	GGA	1
ctf8_103	ctf8Δ	CAN1	1622	1622	1	G	A	59	SNP	57	0.966	1		TTTCCTGTTCTTAGCTGTTTGGATCTTATTTCAATGCATAT	TGG	0
ctf8_104	ctf8Δ	CAN1	857	857	1	G	A	46	SNP	45	0.978	1		CGAAGGGAGGTTCTTAGGTTGGGTTTCCTCTTTGATTAACG	TGG	0
ctf8_105	ctf8Δ	CAN1	611	611	1	G	A	78	SNP	77	0.987	1		CAAAGTTCCACTGGCGGCATGGATTAGTATTTTTTGGGTAA	TGG	0
ctf8_106	ctf8Δ	CAN1	577	577	1	C	T	62	SNP	59	0.952	2	385	GTGTAGTTGGCCAAGTCATTCAATTTTGGACGTACAAAGTT	TCA	1
ctf8_106	ctf8Δ	CAN1	963	963	1	C	A	62	SNP	56	0.903	2		AAATCCGTTCCAAGAGCCATCAAAAAAGTTGTTTTCCGTAT	TCA	1
ctf8_107	ctf8Δ	CAN1	901	901	1	G	A	60	SNP	57	0.95	1		CCTTCACATTTCAAGGTACTGAACTAGTTGGTATCACTGCT	TGA	1
ctf8_108	ctf8Δ	CAN1	612	612	1	G	A	39	SNP	37	0.949	1		AAAGTTCCACTGGCGGCATGGATTAGTATTTTTTGGGTAAT	GGA	1
ctf8_109	ctf8Δ	CAN1	969	970	1	A	DEL	42	Deletion	40	0.952	1		GTTCCAAGAGCCATCAAAAAAGTTGTTTTCCGTATCTTAAC	AAG	0
ctf8_11	ctf8Δ	CAN1	857	857	1	G	A	10	SNP	7	0.7	1		CGAAGGGAGGTTCTTAGGTTGGGTTTCCTCTTTGATTAACG	TGG	0
ctf8_110	ctf8Δ	CAN1	452	452	1	C	T	21	SNP	20	0.952	1		TACATTCACCCCTGTTACATCCTCTTTCACAGTGTTCTCAC	TCC	1
ctf8_111	ctf8Δ	CAN1	1175	1175	1	C	T	34	SNP	34	1	1		CATTATTTCTGCCGCAAATTCAAATATTTACGTTGGTTCCC	TCA	1
ctf8_112	ctf8Δ	CAN1	424	424	1	G	A	63	SNP	62	0.984	1		CTGTCACGCAGTCCTTGGGTGAAATGGCTACATTCACCCCT	TGA	1
ctf8_113	ctf8Δ	CAN1	612	612	1	G	A	30	SNP	19	0.633	1		AAAGTTCCACTGGCGGCATGGATTAGTATTTTTTGGGTAAT	GGA	1
ctf8_114	ctf8Δ	CAN1	925	925	1	G	A	53	SNP	50	0.943	1		TAGTTGGTATCACTGCTGGTGAAGCTGCAAACCCCAGAAAA	TGA	1
ctf8_115	ctf8Δ	CAN1	901	901	1	G	A	44	SNP	41	0.932	1		CCTTCACATTTCAAGGTACTGAACTAGTTGGTATCACTGCT	TGA	1
ctf8_116	ctf8Δ	CAN1	1175	1175	1	C	T	47	SNP	43	0.915	1		CATTATTTCTGCCGCAAATTCAAATATTTACGTTGGTTCCC	TCA	1
ctf8_12	ctf8Δ	CAN1	470	470	1	C	G	11	SNP	5	0.455	1		ATCCTCTTTCACAGTGTTCTCACAAAGATTCCTTTCTCCAG	TCA	1
ctf8_13	ctf8Δ	CAN1	1175	1175	1	C	G	19	SNP	6	0.316	1		CATTATTTCTGCCGCAAATTCAAATATTTACGTTGGTTCCC	TCA	1
ctf8_14	ctf8Δ	CAN1	1004	1004	1	C	T	11	SNP	5	0.455	1		CTTAACCTTCTACATTGGCTCTCTATTATTCATTGGACTTT	TCT	1
ctf8_15	ctf8Δ	CAN1	1214	1214	1	C	G	5	SNP	4	0.8	1		CCGTATTTTATTTGGTCTATCAAAGAACAAGTTGGCTCCTA	TCA	1
ctf8_16	ctf8Δ	CAN1	1214	1214	1	C	T	10	SNP	3	0.3	1		CCGTATTTTATTTGGTCTATCAAAGAACAAGTTGGCTCCTA	TCA	1
ctf8_17	ctf8Δ	CAN1	788	788	1	G	A	116	SNP	62	0.534	1		CCCAGTTGGATTCCGTTATTGGAGAAACCCAGGTGCCTGGG	TGG	0
ctf8_18	ctf8Δ	CAN1	113	113	1	C	G	17	SNP	7	0.412	1		AACACACCACAGACGTGGGTCAATACCATTAAAAGATGAGA	TCA	1
ctf8_19	ctf8Δ	CAN1	788	788	1	G	A	20	SNP	7	0.35	1		CCCAGTTGGATTCCGTTATTGGAGAAACCCAGGTGCCTGGG	TGG	0
ctf8_20	ctf8Δ	CAN1	453	454	1	C	DEL	9	Deletion	5	0.556	1		ACATTCACCCCTGTTACATCCTCTTTCACAGTGTTCTCACA	CCT	0
ctf8_21	ctf8Δ	CAN1	673	673	1	G	A	140	SNP	137	0.979	1		TCCCTGTCAAATATTACGGTGAATTCGAGTTCTGGGTCGCT	TGA	1
ctf8_24	ctf8Δ	CAN1	679	679	1	G	A	11	SNP	3	0.273	1		TCAAATATTACGGTGAATTCGAGTTCTGGGTCGCTTCCATC	CGA	1
ctf8_25	ctf8Δ	CAN1	788	788	1	G	A	7	SNP	5	0.714	1		CCCAGTTGGATTCCGTTATTGGAGAAACCCAGGTGCCTGGG	TGG	0
ctf8_26	ctf8Δ	CAN1	332	332	1	C	G	13	SNP	4	0.308	1		AGGTCTTTTCATTGGTTTATCCACACCTCTGACCAACGCCG	TCC	1
ctf8_27	ctf8Δ	CAN1	1403	1403	1	C	G	8	SNP	6	0.75	1		TTTTGCATGGTTATTTATCTCAATCTCGCACATCAGATTTA	TCA	1
ctf8_29	ctf8Δ	CAN1	969	970	1	A	DEL	20	Deletion	7	0.35	1		GTTCCAAGAGCCATCAAAAAAGTTGTTTTCCGTATCTTAAC	AAG	0
ctf8_3	ctf8Δ	CAN1	113	113	1	C	G	13	SNP	6	0.462	1		AACACACCACAGACGTGGGTCAATACCATTAAAAGATGAGA	TCA	1
ctf8_30	ctf8Δ	CAN1	1403	1403	1	C	G	7	SNP	2	0.286	1		TTTTGCATGGTTATTTATCTCAATCTCGCACATCAGATTTA	TCA	1
ctf8_32	ctf8Δ	CAN1	679	679	1	G	A	5	SNP	2	0.4	1		TCAAATATTACGGTGAATTCGAGTTCTGGGTCGCTTCCATC	CGA	1
ctf8_33	ctf8Δ	CAN1	1214	1214	1	C	T	7	SNP	2	0.286	1		CCGTATTTTATTTGGTCTATCAAAGAACAAGTTGGCTCCTA	TCA	1
ctf8_34	ctf8Δ	CAN1	113	113	1	C	G	5	SNP	3	0.6	1		AACACACCACAGACGTGGGTCAATACCATTAAAAGATGAGA	TCA	1
ctf8_35	ctf8Δ	CAN1	1244	1244	1	C	G	6	SNP	4	0.667	1		GTTGGCTCCTAAATTCCTGTCAAGGACCACCAAAGGTGGTG	TCA	1
ctf8_36	ctf8Δ	CAN1	113	113	1	C	G	12	SNP	3	0.25	1		AACACACCACAGACGTGGGTCAATACCATTAAAAGATGAGA	TCA	1
ctf8_4	ctf8Δ	CAN1	1018	1018	1	G	A	14	SNP	6	0.429	1		TTGGCTCTCTATTATTCATTGGACTTTTAGTTCCATACAAT	TGG	0
ctf8_5	ctf8Δ	CAN1	789	789	1	G	A	10	SNP	3	0.3	1		CCAGTTGGATTCCGTTATTGGAGAAACCCAGGTGCCTGGGG	GGA	1
ctf8_6	ctf8Δ	CAN1	1214	1214	1	C	G	9	SNP	3	0.333	1		CCGTATTTTATTTGGTCTATCAAAGAACAAGTTGGCTCCTA	TCA	1
ctf8_8	ctf8Δ	CAN1	679	679	1	G	A	10	SNP	4	0.4	1		TCAAATATTACGGTGAATTCGAGTTCTGGGTCGCTTCCATC	CGA	1
ctf8_9	ctf8Δ	CAN1	585	585	1	G	A	20	SNP	5	0.25	1		GGCCAAGTCATTCAATTTTGGACGTACAAAGTTCCACTGGC	GGA	1
dcc1_ 37	dcc1Δ	CAN1	352	352	1	G	A	6	SNP	6	1	1		CCACACCTCTGACCAACGCCGGCCCAGTGGGCGCTCTTATA	CGG	0
dcc1_ 38	dcc1Δ	CAN1	925	925	1	G	A	16	SNP	16	1	1		TAGTTGGTATCACTGCTGGTGAAGCTGCAAACCCCAGAAAA	TGA	1
dcc1_ 39	dcc1Δ	CAN1	612	612	1	G	A	8	SNP	7	0.875	1		AAAGTTCCACTGGCGGCATGGATTAGTATTTTTTGGGTAAT	GGA	1
dcc1_ 40	dcc1Δ	CAN1	679	679	1	G	A	12	SNP	11	0.917	1		TCAAATATTACGGTGAATTCGAGTTCTGGGTCGCTTCCATC	CGA	1
dcc1_ 41	dcc1Δ	CAN1	922	922	1	G	A	6	SNP	6	1	1		AACTAGTTGGTATCACTGCTGGTGAAGCTGCAAACCCCAGA	TGG	0
dcc1_ 42	dcc1Δ	CAN1	585	585	1	G	A	9	SNP	9	1	1		GGCCAAGTCATTCAATTTTGGACGTACAAAGTTCCACTGGC	GGA	1
dcc1_ 43	dcc1Δ	CAN1	1244	1244	1	C	G	7	SNP	7	1	1		GTTGGCTCCTAAATTCCTGTCAAGGACCACCAAAGGTGGTG	TCA	1
dcc1_ 44	dcc1Δ	CAN1	612	612	1	G	A	9	SNP	9	1	1		AAAGTTCCACTGGCGGCATGGATTAGTATTTTTTGGGTAAT	GGA	1
dcc1_ 45	dcc1Δ	CAN1	612	612	1	G	A	5	SNP	5	1	1		AAAGTTCCACTGGCGGCATGGATTAGTATTTTTTGGGTAAT	GGA	1
dcc1_ 46	dcc1Δ	CAN1	892	892	1	C	T	11	SNP	9	0.818	1		TTAACGCTGCCTTCACATTTCAAGGTACTGAACTAGTTGGT	TCA	1
dcc1_ 47	dcc1Δ	CAN1	11	11	1	C	G	9	SNP	9	1	1		ATGACAAATTCAAAAGAAGACGCCGACATAG	TCA	1
dcc1_1	dcc1Δ	CAN1	584	584	1	G	A	6	SNP	6	1	1		TGGCCAAGTCATTCAATTTTGGACGTACAAAGTTCCACTGG	TGG	0
dcc1_10	dcc1Δ	CAN1	1163	1163	1	C	T	6	SNP	6	1	1		TATCTTAACAACCATTATTTCTGCCGCAAATTCAAATATTT	TCT	1
dcc1_11	dcc1Δ	CAN1	1018	1018	1	G	A	6	SNP	6	1	1		TTGGCTCTCTATTATTCATTGGACTTTTAGTTCCATACAAT	TGG	0
dcc1_12	dcc1Δ	CAN1	1537	1537	1	C	T	5	SNP	5	1	1		TGACGATCATTATCATTATTCAAGGTTTCACGGCTTTTGCA	TCA	1
dcc1_13	dcc1Δ	CAN1	925	925	1	G	A	10	SNP	10	1	1		TAGTTGGTATCACTGCTGGTGAAGCTGCAAACCCCAGAAAA	TGA	1
dcc1_14	dcc1Δ	CAN1	1623	1623	1	G	A	15	SNP	15	1	1		TTCCTGTTCTTAGCTGTTTGGATCTTATTTCAATGCATATT	GGA	1
dcc1_15	dcc1Δ	CAN1	585	585	1	G	A	7	SNP	6	0.857	1		GGCCAAGTCATTCAATTTTGGACGTACAAAGTTCCACTGGC	GGA	1
dcc1_16	dcc1Δ	CAN1	612	612	1	G	A	11	SNP	11	1	1		AAAGTTCCACTGGCGGCATGGATTAGTATTTTTTGGGTAAT	GGA	1
dcc1_17	dcc1Δ	CAN1	1391	1391	1	G	A	5	SNP	5	1	1		TGTTGCAGGCTTTTTTGCATGGTTATTTATCTCAATCTCGC	TGG	0
dcc1_18	dcc1Δ	CAN1	679	679	1	G	A	3	SNP	3	1	1		TCAAATATTACGGTGAATTCGAGTTCTGGGTCGCTTCCATC	CGA	1
dcc1_19	dcc1Δ	CAN1	1214	1214	1	C	G	5	SNP	5	1	1		CCGTATTTTATTTGGTCTATCAAAGAACAAGTTGGCTCCTA	TCA	1
dcc1_2	dcc1Δ	CAN1	452	452	1	C	T	7	SNP	7	1	1		TACATTCACCCCTGTTACATCCTCTTTCACAGTGTTCTCAC	TCC	1
dcc1_20	dcc1Δ	CAN1	285	285	1	G	A	7	SNP	7	1	2	639	AAGCAAAGACATATTGGTATGATTGCCCTTGGTGGTACTAT	TGA	1
dcc1_20	dcc1Δ	CAN1	925	925	1	G	A	7	SNP	7	1	2		TAGTTGGTATCACTGCTGGTGAAGCTGCAAACCCCAGAAAA	TGA	1
dcc1_21	dcc1Δ	CAN1	1537	1537	1	C	T	13	SNP	13	1	1		TGACGATCATTATCATTATTCAAGGTTTCACGGCTTTTGCA	TCA	1
dcc1_22	dcc1Δ	CAN1	925	925	1	G	A	10	SNP	10	1	1		TAGTTGGTATCACTGCTGGTGAAGCTGCAAACCCCAGAAAA	TGA	1
dcc1_23	dcc1Δ	CAN1	1214	1214	1	C	T	5	SNP	4	0.8	1		CCGTATTTTATTTGGTCTATCAAAGAACAAGTTGGCTCCTA	TCA	1
dcc1_24	dcc1Δ	CAN1	895	895	1	G	A	8	SNP	8	1	1		ACGCTGCCTTCACATTTCAAGGTACTGAACTAGTTGGTATC	AGG	0
dcc1_25	dcc1Δ	CAN1	612	612	1	G	A	4	SNP	3	0.75	1		AAAGTTCCACTGGCGGCATGGATTAGTATTTTTTGGGTAAT	GGA	1
dcc1_27	dcc1Δ	CAN1	656	656	1	C	T	3	SNP	2	0.667	1		CACAATAATGAACTTGTTCCCTGTCAAATATTACGGTGAAT	CCT	0
dcc1_3	dcc1Δ	CAN1	673	673	1	G	A	8	SNP	8	1	1		TCCCTGTCAAATATTACGGTGAATTCGAGTTCTGGGTCGCT	TGA	1
dcc1_30	dcc1Δ	CAN1	530	530	1	G	A	5	SNP	5	1	1		TTACATGTATTGGTTTTCTTGGGCAATCACTTTTGCCCTGG	TGG	0
dcc1_31	dcc1Δ	CAN1	1633	1633	1	C	T	3	SNP	3	1	1		TAGCTGTTTGGATCTTATTTCAATGCATATTCAGATGCAGA	TCA	1
dcc1_32	dcc1Δ	CAN1	679	679	1	G	A	3	SNP	3	1	1		TCAAATATTACGGTGAATTCGAGTTCTGGGTCGCTTCCATC	CGA	1
dcc1_33	dcc1Δ	CAN1	656	656	1	C	T	11	SNP	11	1	1		CACAATAATGAACTTGTTCCCTGTCAAATATTACGGTGAAT	CCT	0
dcc1_34	dcc1Δ	CAN1	1268	1268	1	C	G	9	SNP	9	1	1		GACCACCAAAGGTGGTGTTCCATACATTGCAGTTTTCGTTA	CCA	0
dcc1_35	dcc1Δ	CAN1	113	113	1	C	G	2	SNP	2	1	1		AACACACCACAGACGTGGGTCAATACCATTAAAAGATGAGA	TCA	1
dcc1_36	dcc1Δ	CAN1	925	925	1	G	A	9	SNP	9	1	1		TAGTTGGTATCACTGCTGGTGAAGCTGCAAACCCCAGAAAA	TGA	1
dcc1_4	dcc1Δ	CAN1	1623	1623	1	G	A	12	SNP	12	1	1		TTCCTGTTCTTAGCTGTTTGGATCTTATTTCAATGCATATT	GGA	1
dcc1_5	dcc1Δ	CAN1	424	424	1	G	A	8	SNP	8	1	1		CTGTCACGCAGTCCTTGGGTGAAATGGCTACATTCACCCCT	TGA	1
dcc1_6	dcc1Δ	CAN1	789	789	1	G	A	9	SNP	9	1	1		CCAGTTGGATTCCGTTATTGGAGAAACCCAGGTGCCTGGGG	GGA	1
dcc1_7	dcc1Δ	CAN1	901	901	1	G	A	8	SNP	8	1	1		CCTTCACATTTCAAGGTACTGAACTAGTTGGTATCACTGCT	TGA	1
dcc1_8	dcc1Δ	CAN1	925	925	1	G	A	10	SNP	10	1	1		TAGTTGGTATCACTGCTGGTGAAGCTGCAAACCCCAGAAAA	TGA	1
dcc1_9	dcc1Δ	CAN1	1623	1623	1	G	A	7	SNP	7	1	1		TTCCTGTTCTTAGCTGTTTGGATCTTATTTCAATGCATATT	GGA	1
ddc1_1	ddc1Δ	CAN1	1214	1214	1	C	T	28	SNP	12	0.429	1		CCGTATTTTATTTGGTCTATCAAAGAACAAGTTGGCTCCTA	TCA	1
ddc1_101	ddc1Δ	CAN1	374	374	1	C	G	10	SNP	10	1	1		CCCAGTGGGCGCTCTTATATCATATTTATTTATGGGTTCTT	TCA	1
ddc1_102	ddc1Δ	CAN1	1403	1403	1	C	G	11	SNP	11	1	1		TTTTGCATGGTTATTTATCTCAATCTCGCACATCAGATTTA	TCA	1
ddc1_103	ddc1Δ	CAN1	922	922	1	G	A	6	SNP	6	1	1		AACTAGTTGGTATCACTGCTGGTGAAGCTGCAAACCCCAGA	TGG	0
ddc1_104	ddc1Δ	CAN1	979	979	1	C	T	8	SNP	8	1	1		CCATCAAAAAAGTTGTTTTCCGTATCTTAACCTTCTACATT	CCG	0
ddc1_105	ddc1Δ	CAN1	550	550	1	G	A	17	SNP	17	1	1		GGGCAATCACTTTTGCCCTGGAACTTAGTGTAGTTGGCCAA	GGA	1
ddc1_106	ddc1Δ	CAN1	1403	1403	1	C	G	16	SNP	15	0.938	1		TTTTGCATGGTTATTTATCTCAATCTCGCACATCAGATTTA	TCA	1
ddc1_110	ddc1Δ	CAN1	1244	1244	1	C	G	7	SNP	6	0.857	1		GTTGGCTCCTAAATTCCTGTCAAGGACCACCAAAGGTGGTG	TCA	1
ddc1_111	ddc1Δ	CAN1	1537	1537	1	C	T	9	SNP	9	1	1		TGACGATCATTATCATTATTCAAGGTTTCACGGCTTTTGCA	TCA	1
ddc1_112	ddc1Δ	CAN1	1214	1214	1	C	G	7	SNP	7	1	1		CCGTATTTTATTTGGTCTATCAAAGAACAAGTTGGCTCCTA	TCA	1
ddc1_113	ddc1Δ	CAN1	1195	1195	1	C	T	7	SNP	7	1	1		CAAATATTTACGTTGGTTCCCGTATTTTATTTGGTCTATCA	CCG	0
ddc1_114	ddc1Δ	CAN1	470	470	1	C	G	2	SNP	2	1	1		ATCCTCTTTCACAGTGTTCTCACAAAGATTCCTTTCTCCAG	TCA	1
ddc1_115	ddc1Δ	CAN1	11	11	1	C	G	4	SNP	4	1	1		ATGACAAATTCAAAAGAAGACGCCGACATAG	TCA	1
ddc1_117	ddc1Δ	CAN1	1284	1284	1	C	A	3	SNP	3	1	2	252	GTTCCATACATTGCAGTTTTCGTTACTGCTGCATTTGGCGC	TCG	1
ddc1_117	ddc1Δ	CAN1	1537	1537	1	C	T	3	SNP	3	1	2		TGACGATCATTATCATTATTCAAGGTTTCACGGCTTTTGCA	TCA	1
ddc1_13	ddc1Δ	CAN1	11	11	1	C	G	14	SNP	5	0.357	1		ATGACAAATTCAAAAGAAGACGCCGACATAG	TCA	1
ddc1_14	ddc1Δ	CAN1	1403	1403	1	C	G	9	SNP	6	0.667	1		TTTTGCATGGTTATTTATCTCAATCTCGCACATCAGATTTA	TCA	1
ddc1_17	ddc1Δ	CAN1	1284	1285	1	C	DEL	22	Deletion	7	0.318	1		GTTCCATACATTGCAGTTTTCGTTACTGCTGCATTTGGCGC	TCG	1
ddc1_2	ddc1Δ	CAN1	1163	1163	1	C	T	11	SNP	4	0.364	1		TATCTTAACAACCATTATTTCTGCCGCAAATTCAAATATTT	TCT	1
ddc1_21	ddc1Δ	CAN1	113	113	1	C	G	10	SNP	4	0.4	1		AACACACCACAGACGTGGGTCAATACCATTAAAAGATGAGA	TCA	1
ddc1_24	ddc1Δ	CAN1	901	901	1	G	A	13	SNP	6	0.462	1		CCTTCACATTTCAAGGTACTGAACTAGTTGGTATCACTGCT	TGA	1
ddc1_27	ddc1Δ	CAN1	1325	1325	1	C	A	6	SNP	3	0.5	2	77	TTTGGCTTACATGGAGACATCTACTGGTGGTGACAAAGTTT	TCT	1
ddc1_27	ddc1Δ	CAN1	1403	1403	1	C	G	6	SNP	3	0.5	2		TTTTGCATGGTTATTTATCTCAATCTCGCACATCAGATTTA	TCA	1
ddc1_3	ddc1Δ	CAN1	1537	1537	1	C	T	15	SNP	7	0.467	1		TGACGATCATTATCATTATTCAAGGTTTCACGGCTTTTGCA	TCA	1
ddc1_31	ddc1Δ	CAN1	1214	1214	1	C	G	12	SNP	4	0.333	1		CCGTATTTTATTTGGTCTATCAAAGAACAAGTTGGCTCCTA	TCA	1
ddc1_35	ddc1Δ	CAN1	1185	1185	1	C	A	10	SNP	6	0.6	1		GCCGCAAATTCAAATATTTACGTTGGTTCCCGTATTTTATT	ACG	0
ddc1_36	ddc1Δ	CAN1	374	374	1	C	G	16	SNP	8	0.5	1		CCCAGTGGGCGCTCTTATATCATATTTATTTATGGGTTCTT	TCA	1
ddc1_39	ddc1Δ	CAN1	1175	1175	1	C	G	16	SNP	5	0.313	1		CATTATTTCTGCCGCAAATTCAAATATTTACGTTGGTTCCC	TCA	1
ddc1_4	ddc1Δ	CAN1	1284	1284	1	C	T	24	SNP	11	0.458	1		GTTCCATACATTGCAGTTTTCGTTACTGCTGCATTTGGCGC	TCG	1
ddc1_41	ddc1Δ	CAN1	979	979	1	C	T	22	SNP	6	0.273	1		CCATCAAAAAAGTTGTTTTCCGTATCTTAACCTTCTACATT	CCG	0
ddc1_43	ddc1Δ	CAN1	585	585	1	G	A	12	SNP	3	0.25	1		GGCCAAGTCATTCAATTTTGGACGTACAAAGTTCCACTGGC	GGA	1
ddc1_45	ddc1Δ	CAN1	1244	1244	1	C	G	27	SNP	8	0.296	1		GTTGGCTCCTAAATTCCTGTCAAGGACCACCAAAGGTGGTG	TCA	1
ddc1_6	ddc1Δ	CAN1	11	11	1	C	G	4	SNP	4	1	1		ATGACAAATTCAAAAGAAGACGCCGACATAG	TCA	1
ddc1_8	ddc1Δ	CAN1	577	577	1	C	T	17	SNP	7	0.412	1		GTGTAGTTGGCCAAGTCATTCAATTTTGGACGTACAAAGTT	TCA	1
ddc1_9	ddc1Δ	CAN1	577	577	1	C	T	19	SNP	6	0.316	1		GTGTAGTTGGCCAAGTCATTCAATTTTGGACGTACAAAGTT	TCA	1
dep1_01	dep1Δ	CAN1	577	577	1	C	T	11	SNP	4	0.364	1		GTGTAGTTGGCCAAGTCATTCAATTTTGGACGTACAAAGTT	TCA	1
dep1_02	dep1Δ	CAN1	625	626	1	T	DEL	4	Deletion	3	0.75	1		CGGCATGGATTAGTATTTTTTGGGTAATTATCACAATAATG	TTG	0
dep1_04	dep1Δ	CAN1	1175	1175	1	C	G	13	SNP	7	0.538	1		CATTATTTCTGCCGCAAATTCAAATATTTACGTTGGTTCCC	TCA	1
dep1_06	dep1Δ	CAN1	1195	1195	1	C	T	8	SNP	2	0.25	1		CAAATATTTACGTTGGTTCCCGTATTTTATTTGGTCTATCA	CCG	0
dep1_08	dep1Δ	CAN1	113	113	1	C	G	5	SNP	2	0.4	3	1017	AACACACCACAGACGTGGGTCAATACCATTAAAAGATGAGA	TCA	1
dep1_08	dep1Δ	CAN1	1131	1131	2	INS	AT	5	Insertion	2	0.4	3	0	CAAAGGTTTTGCCACATATCTTCAACGCTGTTATCTTAAC		0
dep1_08	dep1Δ	CAN1	1131	1131	1	C	G	5	SNP	2	0.4	3		ACAAAGGTTTTGCCACATATCTTCAACGCTGTTATCTTAAC	TCT	1
dep1_10	dep1Δ	CAN1	550	550	1	G	C	20	SNP	9	0.45	1		GGGCAATCACTTTTGCCCTGGAACTTAGTGTAGTTGGCCAA	GGA	1
dep1_12	dep1Δ	CAN1	1623	1623	1	G	A	7	SNP	4	0.571	1		TTCCTGTTCTTAGCTGTTTGGATCTTATTTCAATGCATATT	GGA	1
dep1_15	dep1Δ	CAN1	1371	1371	1	INS	G	5	Insertion	2	0.4	1		GGCTATTAAATATCACTGGTGTTGCAGGCTTTTTTGCATG		0
dep1_16	dep1Δ	CAN1	892	892	1	C	G	8	SNP	2	0.25	1		TTAACGCTGCCTTCACATTTCAAGGTACTGAACTAGTTGGT	TCA	1
dep1_17	dep1Δ	CAN1	374	374	1	C	G	5	SNP	3	0.6	1		CCCAGTGGGCGCTCTTATATCATATTTATTTATGGGTTCTT	TCA	1
dep1_18	dep1Δ	CAN1	1214	1214	1	C	G	14	SNP	8	0.571	1		CCGTATTTTATTTGGTCTATCAAAGAACAAGTTGGCTCCTA	TCA	1
dep1_19	dep1Δ	CAN1	577	577	1	C	T	18	SNP	7	0.389	1		GTGTAGTTGGCCAAGTCATTCAATTTTGGACGTACAAAGTT	TCA	1
dep1_20	dep1Δ	CAN1	1214	1214	1	C	T	12	SNP	5	0.417	1		CCGTATTTTATTTGGTCTATCAAAGAACAAGTTGGCTCCTA	TCA	1
dep1_21	dep1Δ	CAN1	1214	1214	1	C	G	18	SNP	9	0.5	1		CCGTATTTTATTTGGTCTATCAAAGAACAAGTTGGCTCCTA	TCA	1
dep1_22	dep1Δ	CAN1	1403	1403	1	C	G	14	SNP	8	0.571	1		TTTTGCATGGTTATTTATCTCAATCTCGCACATCAGATTTA	TCA	1
dep1_24	dep1Δ	CAN1	1193	1193	1	C	T	5	SNP	2	0.4	1		TTCAAATATTTACGTTGGTTCCCGTATTTTATTTGGTCTAT	TCC	1
dep1_25	dep1Δ	CAN1	423	423	1	T	A	6	SNP	3	0.5	3	0	TCTGTCACGCAGTCCTTGGGTGAAATGGCTACATTCACCCC	GTG	0
dep1_25	dep1Δ	CAN1	424	424	1	G	T	6	SNP	3	0.5	3	0	CTGTCACGCAGTCCTTGGGTGAAATGGCTACATTCACCCCT	TGA	1
dep1_25	dep1Δ	CAN1	425	425	1	A	G	6	SNP	3	0.5	3		TGTCACGCAGTCCTTGGGTGAAATGGCTACATTCACCCCTG	GAA	0
dep1_26	dep1Δ	CAN1	901	901	1	G	A	7	SNP	2	0.286	1		CCTTCACATTTCAAGGTACTGAACTAGTTGGTATCACTGCT	TGA	1
dep1_27	dep1Δ	CAN1	1163	1163	1	C	T	5	SNP	2	0.4	1		TATCTTAACAACCATTATTTCTGCCGCAAATTCAAATATTT	TCT	1
dep1_28	dep1Δ	CAN1	1175	1175	1	C	G	14	SNP	5	0.357	1		CATTATTTCTGCCGCAAATTCAAATATTTACGTTGGTTCCC	TCA	1
dep1_29	dep1Δ	CAN1	424	425	1	G	DEL	8	Deletion	6	0.75	1		CTGTCACGCAGTCCTTGGGTGAAATGGCTACATTCACCCCT	TGA	1
dep1_30	dep1Δ	CAN1	1163	1163	1	C	T	14	SNP	7	0.5	1		TATCTTAACAACCATTATTTCTGCCGCAAATTCAAATATTT	TCT	1
dep1_31	dep1Δ	CAN1	452	452	1	C	T	6	SNP	3	0.5	1		TACATTCACCCCTGTTACATCCTCTTTCACAGTGTTCTCAC	TCC	1
dep1_33	dep1Δ	CAN1	1175	1175	1	C	G	10	SNP	3	0.3	1		CATTATTTCTGCCGCAAATTCAAATATTTACGTTGGTTCCC	TCA	1
dep1_35	dep1Δ	CAN1	980	980	1	G	A	11	SNP	7	0.636	1		CATCAAAAAAGTTGTTTTCCGTATCTTAACCTTCTACATTG	CGT	0
dep1_36	dep1Δ	CAN1	1175	1175	1	C	G	13	SNP	7	0.538	1		CATTATTTCTGCCGCAAATTCAAATATTTACGTTGGTTCCC	TCA	1
dep1_37	dep1Δ	CAN1	1214	1214	1	C	G	14	SNP	7	0.5	1		CCGTATTTTATTTGGTCTATCAAAGAACAAGTTGGCTCCTA	TCA	1
dep1_39	dep1Δ	CAN1	718	718	1	G	A	8	SNP	4	0.5	1		TCAAAGTTTTAGCCATTATCGGGTTTCTAATATACTGTTTT	CGG	0
dep1_41	dep1Δ	CAN1	1214	1214	1	C	G	14	SNP	5	0.357	1		CCGTATTTTATTTGGTCTATCAAAGAACAAGTTGGCTCCTA	TCA	1
dep1_45	dep1Δ	CAN1	939	940	1	C	DEL	14	Deletion	5	0.357	1		GCTGGTGAAGCTGCAAACCCCAGAAAATCCGTTCCAAGAGC	CCA	0
dep1_47	dep1Δ	CAN1	1605	1605	1	INS	T	7	Insertion	3	0.429	2	0	CCGCCTATATCTCTGTTTTCCTGTTCTTAGCTGTTTGGAT		0
dep1_47	dep1Δ	CAN1	1605	1605	1	C	G	7	SNP	3	0.429	2		GCCGCCTATATCTCTGTTTTCCTGTTCTTAGCTGTTTGGAT	TCC	1
dia2_01	dia2Δ	CAN1	577	577	1	C	T	6	SNP	5	0.833	1		GTGTAGTTGGCCAAGTCATTCAATTTTGGACGTACAAAGTT	TCA	1
dia2_02	dia2Δ	CAN1	1214	1214	1	C	G	16	SNP	14	0.875	1		CCGTATTTTATTTGGTCTATCAAAGAACAAGTTGGCTCCTA	TCA	1
dia2_03	dia2Δ	CAN1	925	925	1	G	A	15	SNP	15	1	1		TAGTTGGTATCACTGCTGGTGAAGCTGCAAACCCCAGAAAA	TGA	1
dia2_04	dia2Δ	CAN1	452	452	1	C	T	14	SNP	13	0.929	1		TACATTCACCCCTGTTACATCCTCTTTCACAGTGTTCTCAC	TCC	1
dia2_05	dia2Δ	CAN1	374	374	1	C	G	8	SNP	6	0.75	1		CCCAGTGGGCGCTCTTATATCATATTTATTTATGGGTTCTT	TCA	1
dia2_07	dia2Δ	CAN1	1175	1175	1	C	G	15	SNP	13	0.867	1		CATTATTTCTGCCGCAAATTCAAATATTTACGTTGGTTCCC	TCA	1
dia2_08	dia2Δ	CAN1	892	892	1	INS	T	11	Insertion	10	0.909	4	0	TAACGCTGCCTTCACATTTCAAGGTACTGAACTAGTTGGT		0
dia2_08	dia2Δ	CAN1	892	892	1	INS	T	11	Insertion	10	0.909	4	0	TAACGCTGCCTTCACATTTCAAGGTACTGAACTAGTTGGT		0
dia2_08	dia2Δ	CAN1	892	892	1	C	G	11	SNP	10	0.909	4	558	TTAACGCTGCCTTCACATTTCAAGGTACTGAACTAGTTGGT	TCA	1
dia2_08	dia2Δ	CAN1	1451	1451	1	C	G	11	SNP	10	0.909	4		TTTGAAATACCGTGGCATCTCTCGTGACGAGTTACCATTTA	TCT	1
dia2_09	dia2Δ	CAN1	465	466	1	G	DEL	10	Deletion	10	1	2	2	GTTACATCCTCTTTCACAGTGTTCTCACAAAGATTCCTTTC	TGT	0
dia2_09	dia2Δ	CAN1	468	468	1	C	T	10	SNP	9	0.9	2		ACATCCTCTTTCACAGTGTTCTCACAAAGATTCCTTTCTCC	TCT	1
dia2_10	dia2Δ	CAN1	978	978	2	INS	TT	4	Insertion	4	1	2	0	CCATCAAAAAAGTTGTTTTCCGTATCTTAACCTTCTACAT		0
dia2_10	dia2Δ	CAN1	978	978	1	C	G	4	SNP	4	1	2		GCCATCAAAAAAGTTGTTTTCCGTATCTTAACCTTCTACAT	TCC	1
dia2_12	dia2Δ	CAN1	113	113	1	C	G	11	SNP	10	0.909	1		AACACACCACAGACGTGGGTCAATACCATTAAAAGATGAGA	TCA	1
dia2_13	dia2Δ	CAN1	577	577	1	C	T	11	SNP	10	0.909	1		GTGTAGTTGGCCAAGTCATTCAATTTTGGACGTACAAAGTT	TCA	1
dia2_14	dia2Δ	CAN1	1214	1214	1	C	G	10	SNP	9	0.9	1		CCGTATTTTATTTGGTCTATCAAAGAACAAGTTGGCTCCTA	TCA	1
dia2_15	dia2Δ	CAN1	1214	1214	1	C	G	19	SNP	19	1	1		CCGTATTTTATTTGGTCTATCAAAGAACAAGTTGGCTCCTA	TCA	1
dia2_16	dia2Δ	CAN1	577	577	1	C	T	11	SNP	11	1	1		GTGTAGTTGGCCAAGTCATTCAATTTTGGACGTACAAAGTT	TCA	1
dia2_18	dia2Δ	CAN1	321	321	1	INS	T	5	Insertion	5	1	2	0	CTATTGGTACAGGTCTTTTCATTGGTTTATCCACACCTCT		0
dia2_18	dia2Δ	CAN1	321	321	1	C	G	5	SNP	5	1	2		ACTATTGGTACAGGTCTTTTCATTGGTTTATCCACACCTCT	TCA	1
dia2_19	dia2Δ	CAN1	1214	1214	1	C	G	5	SNP	4	0.8	1		CCGTATTTTATTTGGTCTATCAAAGAACAAGTTGGCTCCTA	TCA	1
dia2_20	dia2Δ	CAN1	577	577	1	C	T	2	SNP	2	1	1		GTGTAGTTGGCCAAGTCATTCAATTTTGGACGTACAAAGTT	TCA	1
dia2_21	dia2Δ	CAN1	892	892	1	C	T	13	SNP	9	0.692	1		TTAACGCTGCCTTCACATTTCAAGGTACTGAACTAGTTGGT	TCA	1
dia2_22	dia2Δ	CAN1	1214	1214	1	C	G	19	SNP	17	0.895	1		CCGTATTTTATTTGGTCTATCAAAGAACAAGTTGGCTCCTA	TCA	1
dia2_23	dia2Δ	CAN1	459	460	1	C	DEL	37	Deletion	35	0.946	1		ACCCCTGTTACATCCTCTTTCACAGTGTTCTCACAAAGATT	TCA	1
dia2_24	dia2Δ	CAN1	1073	1073	1	INS	T	12	Insertion	9	0.75	2	0	CAATCTACTTCCTACGTTTCTACTTCTCCCTTTATTATTG		0
dia2_24	dia2Δ	CAN1	1073	1073	1	C	G	12	SNP	9	0.75	2		ACAATCTACTTCCTACGTTTCTACTTCTCCCTTTATTATTG	TCT	1
dia2_25	dia2Δ	CAN1	1244	1244	1	C	G	8	SNP	6	0.75	1		GTTGGCTCCTAAATTCCTGTCAAGGACCACCAAAGGTGGTG	TCA	1
dia2_26	dia2Δ	CAN1	73	73	1	C	T	18	SNP	17	0.944	2	378	AGCCGGTCACAACCCTCTTTCACGACGTTGAAGCTTCACAA	TCA	1
dia2_26	dia2Δ	CAN1	452	452	1	C	T	18	SNP	17	0.944	2		TACATTCACCCCTGTTACATCCTCTTTCACAGTGTTCTCAC	TCC	1
dia2_27	dia2Δ	CAN1	885	885	1	C	T	7	SNP	6	0.857	2	747	TCTTTGATTAACGCTGCCTTCACATTTCAAGGTACTGAACT	TCA	1
dia2_27	dia2Δ	CAN1	1633	1633	1	C	T	7	SNP	6	0.857	2		TAGCTGTTTGGATCTTATTTCAATGCATATTCAGATGCAGA	TCA	1
dia2_28	dia2Δ	CAN1	1214	1214	1	C	G	11	SNP	10	0.909	1		CCGTATTTTATTTGGTCTATCAAAGAACAAGTTGGCTCCTA	TCA	1
dia2_29	dia2Δ	CAN1	1175	1175	1	C	G	4	SNP	3	0.75	1		CATTATTTCTGCCGCAAATTCAAATATTTACGTTGGTTCCC	TCA	1
dia2_30	dia2Δ	CAN1	1409	1409	1	C	G	2	SNP	2	1	1		ATGGTTATTTATCTCAATCTCGCACATCAGATTTATGCAAG	TCG	1
dia2_32	dia2Δ	CAN1	656	656	1	C	T	10	SNP	9	0.9	1		CACAATAATGAACTTGTTCCCTGTCAAATATTACGGTGAAT	CCT	0
dia2_33	dia2Δ	CAN1	1403	1403	1	C	G	28	SNP	27	0.964	1		TTTTGCATGGTTATTTATCTCAATCTCGCACATCAGATTTA	TCA	1
dia2_34	dia2Δ	CAN1	257	257	1	G	A	7	SNP	7	1	2	735	ACAGAACGCTGAAGTGAAGAGAGAGCTTAAGCAAAGACATA	AGA	1
dia2_34	dia2Δ	CAN1	993	993	1	C	G	7	SNP	7	1	2		GTTTTCCGTATCTTAACCTTCTACATTGGCTCTCTATTATT	TCT	1
dia2_35	dia2Δ	CAN1	1214	1214	1	C	G	10	SNP	10	1	1		CCGTATTTTATTTGGTCTATCAAAGAACAAGTTGGCTCCTA	TCA	1
dia2_36	dia2Δ	CAN1	1403	1403	1	C	G	14	SNP	14	1	1		TTTTGCATGGTTATTTATCTCAATCTCGCACATCAGATTTA	TCA	1
dia2_37	dia2Δ	CAN1	1214	1214	1	C	G	7	SNP	7	1	1		CCGTATTTTATTTGGTCTATCAAAGAACAAGTTGGCTCCTA	TCA	1
dia2_38	dia2Δ	CAN1	1195	1195	1	C	T	5	SNP	5	1	1		CAAATATTTACGTTGGTTCCCGTATTTTATTTGGTCTATCA	CCG	0
dia2_39	dia2Δ	CAN1	452	452	1	C	T	11	SNP	11	1	1		TACATTCACCCCTGTTACATCCTCTTTCACAGTGTTCTCAC	TCC	1
dia2_40	dia2Δ	CAN1	374	374	1	C	G	11	SNP	11	1	1		CCCAGTGGGCGCTCTTATATCATATTTATTTATGGGTTCTT	TCA	1
dia2_41	dia2Δ	CAN1	1633	1633	1	C	T	8	SNP	8	1	1		TAGCTGTTTGGATCTTATTTCAATGCATATTCAGATGCAGA	TCA	1
dia2_42	dia2Δ	CAN1	1163	1164	1	C	DEL	16	Deletion	16	1	1		TATCTTAACAACCATTATTTCTGCCGCAAATTCAAATATTT	TCT	1
dia2_44	dia2Δ	CAN1	1195	1195	1	C	G	29	SNP	27	0.931	1		CAAATATTTACGTTGGTTCCCGTATTTTATTTGGTCTATCA	CCG	0
dia2_47	dia2Δ	CAN1	113	113	1	C	G	20	SNP	19	0.95	1		AACACACCACAGACGTGGGTCAATACCATTAAAAGATGAGA	TCA	1
dia2_48	dia2Δ	CAN1	1195	1195	1	C	T	17	SNP	16	0.941	1		CAAATATTTACGTTGGTTCCCGTATTTTATTTGGTCTATCA	CCG	0
dia2_49	dia2Δ	CAN1	1195	1195	1	C	T	12	SNP	12	1	1		CAAATATTTACGTTGGTTCCCGTATTTTATTTGGTCTATCA	CCG	0
dia2_50	dia2Δ	CAN1	527	527	1	C	T	14	SNP	14	1	1		TGGTTACATGTATTGGTTTTCTTGGGCAATCACTTTTGCCC	TCT	1
dia2_51	dia2Δ	CAN1	1175	1175	1	C	G	16	SNP	15	0.938	1		CATTATTTCTGCCGCAAATTCAAATATTTACGTTGGTTCCC	TCA	1
dia2_52	dia2Δ	CAN1	1175	1175	1	C	G	12	SNP	12	1	1		CATTATTTCTGCCGCAAATTCAAATATTTACGTTGGTTCCC	TCA	1
dma1_1	dma1Δ	CAN1	577	577	1	C	T	12	SNP	6	0.5	1		GTGTAGTTGGCCAAGTCATTCAATTTTGGACGTACAAAGTT	TCA	1
dma1_15	dma1Δ	CAN1	1214	1214	1	C	T	5	SNP	2	0.4	1		CCGTATTTTATTTGGTCTATCAAAGAACAAGTTGGCTCCTA	TCA	1
dma1_17	dma1Δ	CAN1	452	452	1	C	T	2	SNP	2	1	1		TACATTCACCCCTGTTACATCCTCTTTCACAGTGTTCTCAC	TCC	1
dma1_18	dma1Δ	CAN1	925	925	1	G	A	6	SNP	3	0.5	1		TAGTTGGTATCACTGCTGGTGAAGCTGCAAACCCCAGAAAA	TGA	1
dma1_19	dma1Δ	CAN1	1175	1175	1	C	T	4	SNP	2	0.5	1		CATTATTTCTGCCGCAAATTCAAATATTTACGTTGGTTCCC	TCA	1
dma1_2	dma1Δ	CAN1	1214	1214	1	C	G	7	SNP	4	0.571	1		CCGTATTTTATTTGGTCTATCAAAGAACAAGTTGGCTCCTA	TCA	1
dma1_21	dma1Δ	CAN1	470	470	1	C	G	2	SNP	2	1	1		ATCCTCTTTCACAGTGTTCTCACAAAGATTCCTTTCTCCAG	TCA	1
dma1_23	dma1Δ	CAN1	1214	1214	1	C	T	2	SNP	2	1	1		CCGTATTTTATTTGGTCTATCAAAGAACAAGTTGGCTCCTA	TCA	1
dma1_24	dma1Δ	CAN1	452	452	1	C	T	2	SNP	2	1	1		TACATTCACCCCTGTTACATCCTCTTTCACAGTGTTCTCAC	TCC	1
dma1_27	dma1Δ	CAN1	1214	1214	1	C	G	3	SNP	2	0.667	1		CCGTATTTTATTTGGTCTATCAAAGAACAAGTTGGCTCCTA	TCA	1
dma1_30	dma1Δ	CAN1	679	679	1	G	A	4	SNP	3	0.75	1		TCAAATATTACGGTGAATTCGAGTTCTGGGTCGCTTCCATC	CGA	1
dma1_36	dma1Δ	CAN1	1175	1175	1	C	T	3	SNP	2	0.667	1		CATTATTTCTGCCGCAAATTCAAATATTTACGTTGGTTCCC	TCA	1
dma1_37	dma1Δ	CAN1	424	424	1	G	A	6	SNP	3	0.5	1		CTGTCACGCAGTCCTTGGGTGAAATGGCTACATTCACCCCT	TGA	1
dma1_40	dma1Δ	CAN1	1193	1193	1	C	T	5	SNP	3	0.6	1		TTCAAATATTTACGTTGGTTCCCGTATTTTATTTGGTCTAT	TCC	1
dma1_45	dma1Δ	CAN1	1487	1487	1	C	T	6	SNP	4	0.667	1		ATTTAAAGCTAAATTAATGCCCGGCTTGGCTTATTATGCGG	CCC	0
dma1_46	dma1Δ	CAN1	1175	1175	1	C	T	6	SNP	2	0.333	1		CATTATTTCTGCCGCAAATTCAAATATTTACGTTGGTTCCC	TCA	1
dma1_49	dma1Δ	CAN1	455	455	1	C	T	8	SNP	2	0.25	1		ATTCACCCCTGTTACATCCTCTTTCACAGTGTTCTCACAAA	TCT	1
dma1_5	dma1Δ	CAN1	527	528	1	C	DEL	11	Deletion	8	0.727	1		TGGTTACATGTATTGGTTTTCTTGGGCAATCACTTTTGCCC	TCT	1
dma1_50	dma1Δ	CAN1	424	424	1	G	A	5	SNP	5	1	1		CTGTCACGCAGTCCTTGGGTGAAATGGCTACATTCACCCCT	TGA	1
dma1_52	dma1Δ	CAN1	314	314	1	G	T	10	SNP	5	0.5	1		TGGTGGTACTATTGGTACAGGTCTTTTCATTGGTTTATCCA	GGT	0
dma1_54	dma1Δ	CAN1	1175	1175	1	C	G	4	SNP	2	0.5	1		CATTATTTCTGCCGCAAATTCAAATATTTACGTTGGTTCCC	TCA	1
dma1_55	dma1Δ	CAN1	374	374	1	C	G	4	SNP	2	0.5	1		CCCAGTGGGCGCTCTTATATCATATTTATTTATGGGTTCTT	TCA	1
dma1_57	dma1Δ	CAN1	679	679	1	G	A	2	SNP	2	1	1		TCAAATATTACGGTGAATTCGAGTTCTGGGTCGCTTCCATC	CGA	1
dma1_59	dma1Δ	CAN1	611	611	1	G	A	4	SNP	3	0.75	1		CAAAGTTCCACTGGCGGCATGGATTAGTATTTTTTGGGTAA	TGG	0
dma1_6	dma1Δ	CAN1	1163	1163	1	C	T	4	SNP	2	0.5	1		TATCTTAACAACCATTATTTCTGCCGCAAATTCAAATATTT	TCT	1
dma1_65	dma1Δ	CAN1	864	865	1	C	DEL	6	Deletion	2	0.333	1		AGGTTCTTAGGTTGGGTTTCCTCTTTGATTAACGCTGCCTT	CCT	0
dma1_66	dma1Δ	CAN1	1244	1244	1	C	G	9	SNP	4	0.444	1		GTTGGCTCCTAAATTCCTGTCAAGGACCACCAAAGGTGGTG	TCA	1
dma1_68	dma1Δ	CAN1	424	424	1	G	A	12	SNP	6	0.5	1		CTGTCACGCAGTCCTTGGGTGAAATGGCTACATTCACCCCT	TGA	1
dma1_69	dma1Δ	CAN1	321	321	1	C	T	6	SNP	6	1	1		ACTATTGGTACAGGTCTTTTCATTGGTTTATCCACACCTCT	TCA	1
dma1_7	dma1Δ	CAN1	113	113	1	C	G	6	SNP	2	0.333	1		AACACACCACAGACGTGGGTCAATACCATTAAAAGATGAGA	TCA	1
dma1_70	dma1Δ	CAN1	1623	1623	1	G	A	4	SNP	3	0.75	1		TTCCTGTTCTTAGCTGTTTGGATCTTATTTCAATGCATATT	GGA	1
dma1_72	dma1Δ	CAN1	1244	1244	1	C	G	8	SNP	6	0.75	1		GTTGGCTCCTAAATTCCTGTCAAGGACCACCAAAGGTGGTG	TCA	1
dma1_75	dma1Δ	CAN1	1175	1175	1	C	G	4	SNP	4	1	1		CATTATTTCTGCCGCAAATTCAAATATTTACGTTGGTTCCC	TCA	1
dma1_76	dma1Δ	CAN1	892	892	1	C	T	3	SNP	2	0.667	1		TTAACGCTGCCTTCACATTTCAAGGTACTGAACTAGTTGGT	TCA	1
dma1_8	dma1Δ	CAN1	1193	1193	1	C	T	8	SNP	3	0.375	1		TTCAAATATTTACGTTGGTTCCCGTATTTTATTTGGTCTAT	TCC	1
dma1_81	dma1Δ	CAN1	352	352	1	G	A	6	SNP	3	0.5	1		CCACACCTCTGACCAACGCCGGCCCAGTGGGCGCTCTTATA	CGG	0
dma1_82	dma1Δ	CAN1	1214	1214	1	C	T	6	SNP	3	0.5	1		CCGTATTTTATTTGGTCTATCAAAGAACAAGTTGGCTCCTA	TCA	1
dma1_84	dma1Δ	CAN1	1537	1537	1	C	T	9	SNP	4	0.444	1		TGACGATCATTATCATTATTCAAGGTTTCACGGCTTTTGCA	TCA	1
dma1_85	dma1Δ	CAN1	1175	1175	1	C	T	10	SNP	6	0.6	1		CATTATTTCTGCCGCAAATTCAAATATTTACGTTGGTTCCC	TCA	1
dma1_91	dma1Δ	CAN1	1214	1214	1	C	T	3	SNP	3	1	1		CCGTATTTTATTTGGTCTATCAAAGAACAAGTTGGCTCCTA	TCA	1
dma1_93	dma1Δ	CAN1	1537	1537	1	C	T	8	SNP	5	0.625	1		TGACGATCATTATCATTATTCAAGGTTTCACGGCTTTTGCA	TCA	1
dma1_94	dma1Δ	CAN1	892	892	1	C	T	5	SNP	5	1	1		TTAACGCTGCCTTCACATTTCAAGGTACTGAACTAGTTGGT	TCA	1
elg1_1	elg1Δ	CAN1	374	374	1	C	G	14	SNP	4	0.286	1		CCCAGTGGGCGCTCTTATATCATATTTATTTATGGGTTCTT	TCA	1
elg1_13	elg1Δ	CAN1	901	901	1	G	A	6	SNP	2	0.333	1		CCTTCACATTTCAAGGTACTGAACTAGTTGGTATCACTGCT	TGA	1
elg1_14	elg1Δ	CAN1	984	984	1	C	G	9	SNP	4	0.444	2	259	AAAAAAGTTGTTTTCCGTATCTTAACCTTCTACATTGGCTC	TCT	1
elg1_14	elg1Δ	CAN1	1244	1244	1	C	G	9	SNP	4	0.444	2		GTTGGCTCCTAAATTCCTGTCAAGGACCACCAAAGGTGGTG	TCA	1
elg1_16	elg1Δ	CAN1	455	455	1	C	T	9	SNP	3	0.333	1		ATTCACCCCTGTTACATCCTCTTTCACAGTGTTCTCACAAA	TCT	1
elg1_17	elg1Δ	CAN1	626	626	1	G	A	9	SNP	3	0.333	1		GGCATGGATTAGTATTTTTTGGGTAATTATCACAATAATGA	TGG	0
elg1_18	elg1Δ	CAN1	321	321	1	C	G	6	SNP	2	0.333	1		ACTATTGGTACAGGTCTTTTCATTGGTTTATCCACACCTCT	TCA	1
elg1_19	elg1Δ	CAN1	1244	1244	1	C	G	4	SNP	3	0.75	1		GTTGGCTCCTAAATTCCTGTCAAGGACCACCAAAGGTGGTG	TCA	1
elg1_2	elg1Δ	CAN1	1403	1403	1	C	G	4	SNP	2	0.5	1		TTTTGCATGGTTATTTATCTCAATCTCGCACATCAGATTTA	TCA	1
elg1_20	elg1Δ	CAN1	687	687	1	G	A	3	SNP	2	0.667	1		TACGGTGAATTCGAGTTCTGGGTCGCTTCCATCAAAGTTTT	GGG	0
elg1_22	elg1Δ	CAN1	969	970	1	A	DEL	6	Deletion	4	0.667	1		GTTCCAAGAGCCATCAAAAAAGTTGTTTTCCGTATCTTAAC	AAG	0
elg1_23	elg1Δ	CAN1	452	452	1	C	T	8	SNP	3	0.375	1		TACATTCACCCCTGTTACATCCTCTTTCACAGTGTTCTCAC	TCC	1
elg1_24	elg1Δ	CAN1	1409	1409	1	C	G	13	SNP	6	0.462	1		ATGGTTATTTATCTCAATCTCGCACATCAGATTTATGCAAG	TCG	1
elg1_25	elg1Δ	CAN1	1403	1403	1	C	G	8	SNP	2	0.25	1		TTTTGCATGGTTATTTATCTCAATCTCGCACATCAGATTTA	TCA	1
elg1_26	elg1Δ	CAN1	11	11	1	C	G	4	SNP	2	0.5	1		ATGACAAATTCAAAAGAAGACGCCGACATAG	TCA	1
elg1_28	elg1Δ	CAN1	1244	1244	1	C	G	8	SNP	4	0.5	1		GTTGGCTCCTAAATTCCTGTCAAGGACCACCAAAGGTGGTG	TCA	1
elg1_29	elg1Δ	CAN1	843	844	1	G	DEL	8	Deletion	4	0.5	1		TCTAAGGATAAAAACGAAGGGAGGTTCTTAGGTTGGGTTTC	GGA	1
elg1_3	elg1Δ	CAN1	1163	1163	1	C	T	12	SNP	3	0.25	1		TATCTTAACAACCATTATTTCTGCCGCAAATTCAAATATTT	TCT	1
elg1_34	elg1Δ	CAN1	1195	1195	1	C	T	10	SNP	3	0.3	1		CAAATATTTACGTTGGTTCCCGTATTTTATTTGGTCTATCA	CCG	0
elg1_36	elg1Δ	CAN1	1244	1244	1	C	G	6	SNP	2	0.333	1		GTTGGCTCCTAAATTCCTGTCAAGGACCACCAAAGGTGGTG	TCA	1
elg1_38	elg1Δ	CAN1	892	892	1	C	T	5	SNP	2	0.4	1		TTAACGCTGCCTTCACATTTCAAGGTACTGAACTAGTTGGT	TCA	1
elg1_39	elg1Δ	CAN1	892	892	1	C	T	4	SNP	3	0.75	1		TTAACGCTGCCTTCACATTTCAAGGTACTGAACTAGTTGGT	TCA	1
elg1_40	elg1Δ	CAN1	1163	1163	1	C	T	8	SNP	3	0.375	1		TATCTTAACAACCATTATTTCTGCCGCAAATTCAAATATTT	TCT	1
elg1_41	elg1Δ	CAN1	1244	1244	1	C	G	4	SNP	2	0.5	1		GTTGGCTCCTAAATTCCTGTCAAGGACCACCAAAGGTGGTG	TCA	1
elg1_42	elg1Δ	CAN1	95	96	1	C	DEL	3	Deletion	3	1	1		CGACGTTGAAGCTTCACAAACACACCACAGACGTGGGTCAA	ACA	0
elg1_44	elg1Δ	CAN1	1244	1244	1	C	G	6	SNP	2	0.333	1		GTTGGCTCCTAAATTCCTGTCAAGGACCACCAAAGGTGGTG	TCA	1
elg1_47	elg1Δ	CAN1	1193	1193	1	C	T	4	SNP	2	0.5	1		TTCAAATATTTACGTTGGTTCCCGTATTTTATTTGGTCTAT	TCC	1
elg1_48	elg1Δ	CAN1	1163	1163	1	C	T	13	SNP	6	0.462	1		TATCTTAACAACCATTATTTCTGCCGCAAATTCAAATATTT	TCT	1
elg1_5	elg1Δ	CAN1	1545	1545	1	C	G	11	SNP	3	0.273	1		ATTATCATTATTCAAGGTTTCACGGCTTTTGCACCAAAATT	TCA	1
elg1_7	elg1Δ	CAN1	892	892	1	C	T	6	SNP	3	0.5	1		TTAACGCTGCCTTCACATTTCAAGGTACTGAACTAGTTGGT	TCA	1
elg1_8	elg1Δ	CAN1	1214	1214	1	C	T	8	SNP	4	0.5	1		CCGTATTTTATTTGGTCTATCAAAGAACAAGTTGGCTCCTA	TCA	1
elg1_9	elg1Δ	CAN1	1244	1244	1	C	G	9	SNP	4	0.444	1		GTTGGCTCCTAAATTCCTGTCAAGGACCACCAAAGGTGGTG	TCA	1
erd1_02	erd1Δ	CAN1	1214	1214	1	C	G	9	SNP	3	0.333	1		CCGTATTTTATTTGGTCTATCAAAGAACAAGTTGGCTCCTA	TCA	1
erd1_05	erd1Δ	CAN1	1244	1244	1	C	G	8	SNP	5	0.625	1		GTTGGCTCCTAAATTCCTGTCAAGGACCACCAAAGGTGGTG	TCA	1
erd1_09	erd1Δ	CAN1	577	577	1	C	T	8	SNP	3	0.375	1		GTGTAGTTGGCCAAGTCATTCAATTTTGGACGTACAAAGTT	TCA	1
erd1_10	erd1Δ	CAN1	356	356	1	C	T	12	SNP	4	0.333	1		ACCTCTGACCAACGCCGGCCCAGTGGGCGCTCTTATATCAT	CCA	0
erd1_11	erd1Δ	CAN1	452	452	1	C	T	7	SNP	2	0.286	1		TACATTCACCCCTGTTACATCCTCTTTCACAGTGTTCTCAC	TCC	1
erd1_12	erd1Δ	CAN1	577	577	1	C	T	3	SNP	3	1	1		GTGTAGTTGGCCAAGTCATTCAATTTTGGACGTACAAAGTT	TCA	1
erd1_16	erd1Δ	CAN1	1163	1163	1	C	T	2	SNP	2	1	1		TATCTTAACAACCATTATTTCTGCCGCAAATTCAAATATTT	TCT	1
erd1_18	erd1Δ	CAN1	1244	1244	1	C	G	7	SNP	2	0.286	1		GTTGGCTCCTAAATTCCTGTCAAGGACCACCAAAGGTGGTG	TCA	1
erd1_19	erd1Δ	CAN1	1214	1214	1	C	T	8	SNP	4	0.5	1		CCGTATTTTATTTGGTCTATCAAAGAACAAGTTGGCTCCTA	TCA	1
erd1_24	erd1Δ	CAN1	527	527	1	C	T	4	SNP	2	0.5	1		TGGTTACATGTATTGGTTTTCTTGGGCAATCACTTTTGCCC	TCT	1
erd1_49	erd1Δ	CAN1	527	527	1	C	T	7	SNP	4	0.571	1		TGGTTACATGTATTGGTTTTCTTGGGCAATCACTTTTGCCC	TCT	1
erd1_50	erd1Δ	CAN1	577	577	1	C	T	2	SNP	2	1	1		GTGTAGTTGGCCAAGTCATTCAATTTTGGACGTACAAAGTT	TCA	1
erd1_51	erd1Δ	CAN1	1537	1537	1	C	T	6	SNP	4	0.667	1		TGACGATCATTATCATTATTCAAGGTTTCACGGCTTTTGCA	TCA	1
erd1_52	erd1Δ	CAN1	1214	1214	1	C	T	5	SNP	4	0.8	1		CCGTATTTTATTTGGTCTATCAAAGAACAAGTTGGCTCCTA	TCA	1
erd1_58	erd1Δ	CAN1	1163	1163	1	C	T	3	SNP	2	0.667	1		TATCTTAACAACCATTATTTCTGCCGCAAATTCAAATATTT	TCT	1
erd1_62	erd1Δ	CAN1	442	442	1	C	T	3	SNP	3	1	1		GTGAAATGGCTACATTCACCCCTGTTACATCCTCTTTCACA	CCC	0
erd1_65	erd1Δ	CAN1	470	470	1	C	G	6	SNP	4	0.667	1		ATCCTCTTTCACAGTGTTCTCACAAAGATTCCTTTCTCCAG	TCA	1
erd1_66	erd1Δ	CAN1	452	452	1	C	T	5	SNP	2	0.4	1		TACATTCACCCCTGTTACATCCTCTTTCACAGTGTTCTCAC	TCC	1
erd1_67	erd1Δ	CAN1	470	470	1	C	G	5	SNP	4	0.8	1		ATCCTCTTTCACAGTGTTCTCACAAAGATTCCTTTCTCCAG	TCA	1
erd1_68	erd1Δ	CAN1	1403	1403	1	C	G	4	SNP	2	0.5	1		TTTTGCATGGTTATTTATCTCAATCTCGCACATCAGATTTA	TCA	1
erd1_71	erd1Δ	CAN1	452	452	1	C	T	6	SNP	4	0.667	1		TACATTCACCCCTGTTACATCCTCTTTCACAGTGTTCTCAC	TCC	1
erd1_72	erd1Δ	CAN1	1214	1214	1	C	T	13	SNP	10	0.769	1		CCGTATTTTATTTGGTCTATCAAAGAACAAGTTGGCTCCTA	TCA	1
esc1_04	esc1Δ	CAN1	1214	1214	1	C	G	17	SNP	5	0.294	1		CCGTATTTTATTTGGTCTATCAAAGAACAAGTTGGCTCCTA	TCA	1
esc1_05	esc1Δ	CAN1	452	452	1	C	T	21	SNP	9	0.429	1		TACATTCACCCCTGTTACATCCTCTTTCACAGTGTTCTCAC	TCC	1
esc1_06	esc1Δ	CAN1	725	725	1	T	G	11	SNP	5	0.455	1		TTTAGCCATTATCGGGTTTCTAATATACTGTTTTTGTATGG	CTA	0
esc1_10	esc1Δ	CAN1	901	901	1	G	A	14	SNP	4	0.286	1		CCTTCACATTTCAAGGTACTGAACTAGTTGGTATCACTGCT	TGA	1
esc1_14	esc1Δ	CAN1	1163	1163	1	C	T	10	SNP	3	0.3	1		TATCTTAACAACCATTATTTCTGCCGCAAATTCAAATATTT	TCT	1
esc1_16	esc1Δ	CAN1	1214	1214	1	C	G	7	SNP	3	0.429	1		CCGTATTTTATTTGGTCTATCAAAGAACAAGTTGGCTCCTA	TCA	1
esc1_17	esc1Δ	CAN1	925	925	1	G	A	14	SNP	5	0.357	1		TAGTTGGTATCACTGCTGGTGAAGCTGCAAACCCCAGAAAA	TGA	1
esc1_18	esc1Δ	CAN1	113	113	1	C	G	26	SNP	9	0.346	1		AACACACCACAGACGTGGGTCAATACCATTAAAAGATGAGA	TCA	1
esc1_19	esc1Δ	CAN1	1244	1244	1	C	G	21	SNP	10	0.476	1		GTTGGCTCCTAAATTCCTGTCAAGGACCACCAAAGGTGGTG	TCA	1
esc1_21	esc1Δ	CAN1	1487	1487	1	C	T	18	SNP	11	0.611	1		ATTTAAAGCTAAATTAATGCCCGGCTTGGCTTATTATGCGG	CCC	0
esc1_22	esc1Δ	CAN1	1195	1195	1	C	T	29	SNP	16	0.552	1		CAAATATTTACGTTGGTTCCCGTATTTTATTTGGTCTATCA	CCG	0
esc1_23	esc1Δ	CAN1	1163	1163	1	C	T	19	SNP	9	0.474	1		TATCTTAACAACCATTATTTCTGCCGCAAATTCAAATATTT	TCT	1
esc1_25	esc1Δ	CAN1	1214	1214	1	C	G	19	SNP	9	0.474	1		CCGTATTTTATTTGGTCTATCAAAGAACAAGTTGGCTCCTA	TCA	1
esc1_26	esc1Δ	CAN1	1267	1267	1	C	G	19	SNP	10	0.526	1		GGACCACCAAAGGTGGTGTTCCATACATTGCAGTTTTCGTT	TCC	1
esc1_27	esc1Δ	CAN1	455	455	1	C	T	32	SNP	7	0.313	1		ATTCACCCCTGTTACATCCTCTTTCACAGTGTTCTCACAAA	TCT	1
esc1_28	esc1Δ	CAN1	390	525	135	TTCTTTGGCATATTCTGTCACGCAGTCCTTGGGTGAAATGGCTACATTCACCCCTGTTACATCCTCTTTCACAGTGTTCTCACAAAGATTCCTTTCTCCAGCATTTGGTGCGGCCAATGGTTACATGTATTGGTT	DEL	9	Deletion	4	0.444	1		ATATCATATTTATTTATGGGTTCTTTGGCATATTCTGTCACGCAGTCCTTGGGTGAAATGGCTACATTCACCCCTGTTACATCCTCTTTCACAGTGTTCTCACAAAGATTCCTTTCTCCAGCATTTGGTGCGGCCAATGGTTACATGTATTGGTTTTCTTGGGCAATCACTTTTG		0
esc1_29	esc1Δ	CAN1	1537	1537	1	C	T	28	SNP	7	0.25	1		TGACGATCATTATCATTATTCAAGGTTTCACGGCTTTTGCA	TCA	1
esc1_30	esc1Δ	CAN1	455	455	1	C	T	20	SNP	7	0.35	1		ATTCACCCCTGTTACATCCTCTTTCACAGTGTTCTCACAAA	TCT	1
esc1_31	esc1Δ	CAN1	374	374	1	C	G	10	SNP	4	0.4	1		CCCAGTGGGCGCTCTTATATCATATTTATTTATGGGTTCTT	TCA	1
esc1_33	esc1Δ	CAN1	1163	1163	1	C	T	19	SNP	5	0.263	1		TATCTTAACAACCATTATTTCTGCCGCAAATTCAAATATTT	TCT	1
esc1_34	esc1Δ	CAN1	1195	1195	1	C	T	22	SNP	7	0.318	1		CAAATATTTACGTTGGTTCCCGTATTTTATTTGGTCTATCA	CCG	0
esc1_35	esc1Δ	CAN1	1214	1214	1	C	T	32	SNP	15	0.469	1		CCGTATTTTATTTGGTCTATCAAAGAACAAGTTGGCTCCTA	TCA	1
esc1_36	esc1Δ	CAN1	679	679	1	G	A	25	SNP	9	0.36	1		TCAAATATTACGGTGAATTCGAGTTCTGGGTCGCTTCCATC	CGA	1
esc1_39	esc1Δ	CAN1	1244	1244	1	C	G	12	SNP	8	0.667	1		GTTGGCTCCTAAATTCCTGTCAAGGACCACCAAAGGTGGTG	TCA	1
esc1_40	esc1Δ	CAN1	452	452	1	C	T	9	SNP	3	0.333	1		TACATTCACCCCTGTTACATCCTCTTTCACAGTGTTCTCAC	TCC	1
esc1_41	esc1Δ	CAN1	612	612	1	G	A	18	SNP	5	0.278	1		AAAGTTCCACTGGCGGCATGGATTAGTATTTTTTGGGTAAT	GGA	1
esc1_42	esc1Δ	CAN1	424	424	1	G	A	19	SNP	10	0.526	1		CTGTCACGCAGTCCTTGGGTGAAATGGCTACATTCACCCCT	TGA	1
esc1_43	esc1Δ	CAN1	938	938	1	C	G	18	SNP	8	0.444	1		TGCTGGTGAAGCTGCAAACCCCAGAAAATCCGTTCCAAGAG	CCC	0
esc1_44	esc1Δ	CAN1	527	527	1	C	T	20	SNP	5	0.25	1		TGGTTACATGTATTGGTTTTCTTGGGCAATCACTTTTGCCC	TCT	1
frk1_1	frk1Δ	CAN1	452	452	1	C	T	11	SNP	11	1	1		TACATTCACCCCTGTTACATCCTCTTTCACAGTGTTCTCAC	TCC	1
frk1_10	frk1Δ	CAN1	82	82	1	G	A	25	SNP	25	1	2	529	CAACCCTCTTTCACGACGTTGAAGCTTCACAAACACACCAC	TGA	1
frk1_10	frk1Δ	CAN1	612	612	1	G	A	25	SNP	25	1	2		AAAGTTCCACTGGCGGCATGGATTAGTATTTTTTGGGTAAT	GGA	1
frk1_11	frk1Δ	CAN1	679	679	1	G	A	31	SNP	30	0.968	1		TCAAATATTACGGTGAATTCGAGTTCTGGGTCGCTTCCATC	CGA	1
frk1_12	frk1Δ	CAN1	1175	1175	1	C	T	18	SNP	18	1	1		CATTATTTCTGCCGCAAATTCAAATATTTACGTTGGTTCCC	TCA	1
frk1_13	frk1Δ	CAN1	1163	1163	1	C	T	29	SNP	29	1	1		TATCTTAACAACCATTATTTCTGCCGCAAATTCAAATATTT	TCT	1
frk1_14	frk1Δ	CAN1	455	455	1	C	T	23	SNP	23	1	1		ATTCACCCCTGTTACATCCTCTTTCACAGTGTTCTCACAAA	TCT	1
frk1_15	frk1Δ	CAN1	1537	1537	1	C	T	22	SNP	20	0.909	1		TGACGATCATTATCATTATTCAAGGTTTCACGGCTTTTGCA	TCA	1
frk1_16	frk1Δ	CAN1	443	443	1	C	T	23	SNP	19	0.826	1		TGAAATGGCTACATTCACCCCTGTTACATCCTCTTTCACAG	CCT	0
frk1_17	frk1Δ	CAN1	673	673	1	G	A	21	SNP	20	0.952	1		TCCCTGTCAAATATTACGGTGAATTCGAGTTCTGGGTCGCT	TGA	1
frk1_18	frk1Δ	CAN1	1537	1537	1	C	T	16	SNP	16	1	1		TGACGATCATTATCATTATTCAAGGTTTCACGGCTTTTGCA	TCA	1
frk1_19	frk1Δ	CAN1	1267	1267	1	C	T	27	SNP	27	1	1		GGACCACCAAAGGTGGTGTTCCATACATTGCAGTTTTCGTT	TCC	1
frk1_2	frk1Δ	CAN1	1244	1244	1	C	G	29	SNP	29	1	1		GTTGGCTCCTAAATTCCTGTCAAGGACCACCAAAGGTGGTG	TCA	1
frk1_20	frk1Δ	CAN1	1633	1633	1	C	T	23	SNP	23	1	1		TAGCTGTTTGGATCTTATTTCAATGCATATTCAGATGCAGA	TCA	1
frk1_21	frk1Δ	CAN1	1163	1163	1	C	T	14	SNP	14	1	1		TATCTTAACAACCATTATTTCTGCCGCAAATTCAAATATTT	TCT	1
frk1_22	frk1Δ	CAN1	1623	1623	1	G	A	10	SNP	9	0.9	1		TTCCTGTTCTTAGCTGTTTGGATCTTATTTCAATGCATATT	GGA	1
frk1_23	frk1Δ	CAN1	626	626	1	G	A	18	SNP	15	0.833	1		GGCATGGATTAGTATTTTTTGGGTAATTATCACAATAATGA	TGG	0
frk1_24	frk1Δ	CAN1	925	925	1	G	A	19	SNP	17	0.895	1		TAGTTGGTATCACTGCTGGTGAAGCTGCAAACCCCAGAAAA	TGA	1
frk1_25	frk1Δ	CAN1	577	577	1	C	T	23	SNP	23	1	1		GTGTAGTTGGCCAAGTCATTCAATTTTGGACGTACAAAGTT	TCA	1
frk1_26	frk1Δ	CAN1	892	892	1	C	T	18	SNP	18	1	1		TTAACGCTGCCTTCACATTTCAAGGTACTGAACTAGTTGGT	TCA	1
frk1_27	frk1Δ	CAN1	1391	1391	1	G	A	14	SNP	13	0.929	1		TGTTGCAGGCTTTTTTGCATGGTTATTTATCTCAATCTCGC	TGG	0
frk1_28	frk1Δ	CAN1	1175	1175	1	C	T	18	SNP	17	0.944	1		CATTATTTCTGCCGCAAATTCAAATATTTACGTTGGTTCCC	TCA	1
frk1_29	frk1Δ	CAN1	374	374	1	C	G	12	SNP	10	0.833	1		CCCAGTGGGCGCTCTTATATCATATTTATTTATGGGTTCTT	TCA	1
frk1_3	frk1Δ	CAN1	1633	1633	1	C	T	26	SNP	26	1	1		TAGCTGTTTGGATCTTATTTCAATGCATATTCAGATGCAGA	TCA	1
frk1_30	frk1Δ	CAN1	452	452	1	C	T	13	SNP	11	0.846	1		TACATTCACCCCTGTTACATCCTCTTTCACAGTGTTCTCAC	TCC	1
frk1_31	frk1Δ	CAN1	1267	1267	1	C	T	8	SNP	8	1	1		GGACCACCAAAGGTGGTGTTCCATACATTGCAGTTTTCGTT	TCC	1
frk1_32	frk1Δ	CAN1	1175	1175	1	C	G	16	SNP	14	0.875	1		CATTATTTCTGCCGCAAATTCAAATATTTACGTTGGTTCCC	TCA	1
frk1_33	frk1Δ	CAN1	113	113	1	INS	G	8	Insertion	2	0.25	4	48	ACACACCACAGACGTGGGTCAATACCATTAAAAGATGAGA		0
frk1_33	frk1Δ	CAN1	161	161	1	INS	G	8	Insertion	2	0.25	4	465	GAATTGTATCCATTGCGCTCTTTCCCGACGAGAGTAAATG		0
frk1_33	frk1Δ	CAN1	626	626	1	INS	A	8	Insertion	2	0.25	4	999	GCATGGATTAGTATTTTTTGGGTAATTATCACAATAATGA		0
frk1_33	frk1Δ	CAN1	1625	1625	1	INS	A	8	Insertion	3	0.375	4		CTGTTCTTAGCTGTTTGGATCTTATTTCAATGCATATTCA		0
frk1_34	frk1Δ	CAN1	788	788	1	G	A	11	SNP	4	0.364	1		CCCAGTTGGATTCCGTTATTGGAGAAACCCAGGTGCCTGGG	TGG	0
frk1_35	frk1Δ	CAN1	673	673	1	G	A	6	SNP	6	1	1		TCCCTGTCAAATATTACGGTGAATTCGAGTTCTGGGTCGCT	TGA	1
frk1_36	frk1Δ	CAN1	789	789	1	G	A	29	SNP	29	1	1		CCAGTTGGATTCCGTTATTGGAGAAACCCAGGTGCCTGGGG	GGA	1
frk1_37	frk1Δ	CAN1	1175	1175	1	C	T	17	SNP	17	1	1		CATTATTTCTGCCGCAAATTCAAATATTTACGTTGGTTCCC	TCA	1
frk1_38	frk1Δ	CAN1	925	925	1	G	A	17	SNP	17	1	1		TAGTTGGTATCACTGCTGGTGAAGCTGCAAACCCCAGAAAA	TGA	1
frk1_39	frk1Δ	CAN1	1537	1537	1	C	T	24	SNP	23	0.958	1		TGACGATCATTATCATTATTCAAGGTTTCACGGCTTTTGCA	TCA	1
frk1_4	frk1Δ	CAN1	1214	1214	1	C	T	21	SNP	21	1	1		CCGTATTTTATTTGGTCTATCAAAGAACAAGTTGGCTCCTA	TCA	1
frk1_40	frk1Δ	CAN1	1214	1214	1	C	G	20	SNP	19	0.95	1		CCGTATTTTATTTGGTCTATCAAAGAACAAGTTGGCTCCTA	TCA	1
frk1_41	frk1Δ	CAN1	1214	1214	1	C	G	28	SNP	27	0.964	1		CCGTATTTTATTTGGTCTATCAAAGAACAAGTTGGCTCCTA	TCA	1
frk1_42	frk1Δ	CAN1	1214	1214	1	C	T	25	SNP	24	0.96	1		CCGTATTTTATTTGGTCTATCAAAGAACAAGTTGGCTCCTA	TCA	1
frk1_43	frk1Δ	CAN1	1195	1195	1	C	T	19	SNP	18	0.947	1		CAAATATTTACGTTGGTTCCCGTATTTTATTTGGTCTATCA	CCG	0
frk1_44	frk1Δ	CAN1	1163	1163	1	C	T	19	SNP	18	0.947	1		TATCTTAACAACCATTATTTCTGCCGCAAATTCAAATATTT	TCT	1
frk1_45	frk1Δ	CAN1	612	612	1	G	A	28	SNP	28	1	1		AAAGTTCCACTGGCGGCATGGATTAGTATTTTTTGGGTAAT	GGA	1
frk1_46	frk1Δ	CAN1	1195	1195	1	C	T	24	SNP	24	1	1		CAAATATTTACGTTGGTTCCCGTATTTTATTTGGTCTATCA	CCG	0
frk1_47	frk1Δ	CAN1	530	530	1	G	A	26	SNP	25	0.962	1		TTACATGTATTGGTTTTCTTGGGCAATCACTTTTGCCCTGG	TGG	0
frk1_48	frk1Δ	CAN1	1163	1163	1	C	T	21	SNP	21	1	1		TATCTTAACAACCATTATTTCTGCCGCAAATTCAAATATTT	TCT	1
frk1_49	frk1Δ	CAN1	424	424	1	G	A	25	SNP	25	1	1		CTGTCACGCAGTCCTTGGGTGAAATGGCTACATTCACCCCT	TGA	1
frk1_5	frk1Δ	CAN1	1606	1607	1	C	DEL	24	Deletion	24	1	1		CCGCCTATATCTCTGTTTTCCTGTTCTTAGCTGTTTGGATC	CCT	0
frk1_50	frk1Δ	CAN1	1633	1633	1	C	T	32	SNP	30	0.938	1		TAGCTGTTTGGATCTTATTTCAATGCATATTCAGATGCAGA	TCA	1
frk1_51	frk1Δ	CAN1	901	901	1	G	A	23	SNP	23	1	1		CCTTCACATTTCAAGGTACTGAACTAGTTGGTATCACTGCT	TGA	1
frk1_52	frk1Δ	CAN1	892	892	1	C	T	25	SNP	22	0.88	1		TTAACGCTGCCTTCACATTTCAAGGTACTGAACTAGTTGGT	TCA	1
frk1_53	frk1Δ	CAN1	1633	1633	1	C	T	12	SNP	12	1	1		TAGCTGTTTGGATCTTATTTCAATGCATATTCAGATGCAGA	TCA	1
frk1_54	frk1Δ	CAN1	1409	1409	1	C	G	25	SNP	24	0.96	1		ATGGTTATTTATCTCAATCTCGCACATCAGATTTATGCAAG	TCG	1
frk1_55	frk1Δ	CAN1	1403	1403	1	C	G	30	SNP	30	1	1		TTTTGCATGGTTATTTATCTCAATCTCGCACATCAGATTTA	TCA	1
frk1_56	frk1Δ	CAN1	11	11	1	C	G	8	SNP	8	1	1		ATGACAAATTCAAAAGAAGACGCCGACATAG	TCA	1
frk1_6	frk1Δ	CAN1	1195	1195	1	C	T	26	SNP	26	1	1		CAAATATTTACGTTGGTTCCCGTATTTTATTTGGTCTATCA	CCG	0
frk1_7	frk1Δ	CAN1	901	901	1	G	A	15	SNP	15	1	1		CCTTCACATTTCAAGGTACTGAACTAGTTGGTATCACTGCT	TGA	1
frk1_8	frk1Δ	CAN1	838	838	1	G	T	25	SNP	24	0.96	1		TAATATCTAAGGATAAAAACGAAGGGAGGTTCTTAGGTTGG	CGA	1
frk1_9	frk1Δ	CAN1	679	679	1	G	A	21	SNP	19	0.905	1		TCAAATATTACGGTGAATTCGAGTTCTGGGTCGCTTCCATC	CGA	1
gcn5_1	gcn5Δ	CAN1	1347	1348	1	C	DEL	13	Deletion	8	0.615	1		ACTGGTGGTGACAAAGTTTTCGAATGGCTATTAAATATCAC	TCG	1
gcn5_10	gcn5Δ	CAN1	1214	1214	1	C	T	15	SNP	10	0.667	1		CCGTATTTTATTTGGTCTATCAAAGAACAAGTTGGCTCCTA	TCA	1
gcn5_11	gcn5Δ	CAN1	892	893	1	C	DEL	17	Deletion	8	0.471	1		TTAACGCTGCCTTCACATTTCAAGGTACTGAACTAGTTGGT	TCA	1
gcn5_12	gcn5Δ	CAN1	1175	1175	1	C	G	29	SNP	14	0.483	1		CATTATTTCTGCCGCAAATTCAAATATTTACGTTGGTTCCC	TCA	1
gcn5_14	gcn5Δ	CAN1	892	892	1	C	G	25	SNP	12	0.48	1		TTAACGCTGCCTTCACATTTCAAGGTACTGAACTAGTTGGT	TCA	1
gcn5_15	gcn5Δ	CAN1	1163	1164	1	C	DEL	7	Deletion	4	0.571	1		TATCTTAACAACCATTATTTCTGCCGCAAATTCAAATATTT	TCT	1
gcn5_17	gcn5Δ	CAN1	864	865	1	C	DEL	5	Deletion	3	0.6	1		AGGTTCTTAGGTTGGGTTTCCTCTTTGATTAACGCTGCCTT	CCT	0
gcn5_18	gcn5Δ	CAN1	1175	1175	1	C	G	9	SNP	4	0.444	1		CATTATTTCTGCCGCAAATTCAAATATTTACGTTGGTTCCC	TCA	1
gcn5_19	gcn5Δ	CAN1	1175	1175	1	C	G	19	SNP	6	0.316	1		CATTATTTCTGCCGCAAATTCAAATATTTACGTTGGTTCCC	TCA	1
gcn5_2	gcn5Δ	CAN1	1426	1426	1	C	T	12	SNP	5	0.417	1		TCTCGCACATCAGATTTATGCAAGCTTTGAAATACCGTGGC	GCA	0
gcn5_20	gcn5Δ	CAN1	1633	1633	1	C	T	12	SNP	3	0.25	1		TAGCTGTTTGGATCTTATTTCAATGCATATTCAGATGCAGA	TCA	1
gcn5_22	gcn5Δ	CAN1	1623	1623	1	G	A	13	SNP	5	0.385	1		TTCCTGTTCTTAGCTGTTTGGATCTTATTTCAATGCATATT	GGA	1
gcn5_23	gcn5Δ	CAN1	1623	1623	1	G	A	7	SNP	2	0.286	1		TTCCTGTTCTTAGCTGTTTGGATCTTATTTCAATGCATATT	GGA	1
gcn5_24	gcn5Δ	CAN1	1403	1403	1	C	G	11	SNP	6	0.545	1		TTTTGCATGGTTATTTATCTCAATCTCGCACATCAGATTTA	TCA	1
gcn5_25	gcn5Δ	CAN1	938	938	1	C	T	10	SNP	6	0.6	1		TGCTGGTGAAGCTGCAAACCCCAGAAAATCCGTTCCAAGAG	CCC	0
gcn5_27	gcn5Δ	CAN1	1175	1175	1	C	T	11	SNP	6	0.545	1		CATTATTTCTGCCGCAAATTCAAATATTTACGTTGGTTCCC	TCA	1
gcn5_3	gcn5Δ	CAN1	1214	1214	1	C	T	8	SNP	5	0.625	1		CCGTATTTTATTTGGTCTATCAAAGAACAAGTTGGCTCCTA	TCA	1
gcn5_30	gcn5Δ	CAN1	996	996	1	C	G	12	SNP	6	0.5	1		TTCCGTATCTTAACCTTCTACATTGGCTCTCTATTATTCAT	ACA	0
gcn5_32	gcn5Δ	CAN1	356	356	1	C	G	22	SNP	9	0.409	1		ACCTCTGACCAACGCCGGCCCAGTGGGCGCTCTTATATCAT	CCA	0
gcn5_37	gcn5Δ	CAN1	679	679	1	G	A	13	SNP	5	0.385	1		TCAAATATTACGGTGAATTCGAGTTCTGGGTCGCTTCCATC	CGA	1
gcn5_39	gcn5Δ	CAN1	530	530	1	G	A	14	SNP	9	0.643	1		TTACATGTATTGGTTTTCTTGGGCAATCACTTTTGCCCTGG	TGG	0
gcn5_4	gcn5Δ	CAN1	374	374	1	C	G	18	SNP	5	0.278	1		CCCAGTGGGCGCTCTTATATCATATTTATTTATGGGTTCTT	TCA	1
gcn5_41	gcn5Δ	CAN1	1391	1391	1	G	A	5	SNP	2	0.4	1		TGTTGCAGGCTTTTTTGCATGGTTATTTATCTCAATCTCGC	TGG	0
gcn5_42	gcn5Δ	CAN1	452	452	1	C	T	7	SNP	2	0.286	1		TACATTCACCCCTGTTACATCCTCTTTCACAGTGTTCTCAC	TCC	1
gcn5_43	gcn5Δ	CAN1	892	893	1	C	DEL	11	Deletion	5	0.455	1		TTAACGCTGCCTTCACATTTCAAGGTACTGAACTAGTTGGT	TCA	1
gcn5_44	gcn5Δ	CAN1	1175	1175	1	C	G	12	SNP	5	0.417	1		CATTATTTCTGCCGCAAATTCAAATATTTACGTTGGTTCCC	TCA	1
gcn5_45	gcn5Δ	CAN1	1175	1175	1	C	G	27	SNP	16	0.593	1		CATTATTTCTGCCGCAAATTCAAATATTTACGTTGGTTCCC	TCA	1
gcn5_47	gcn5Δ	CAN1	1195	1195	1	C	G	12	SNP	5	0.417	1		CAAATATTTACGTTGGTTCCCGTATTTTATTTGGTCTATCA	CCG	0
gcn5_48	gcn5Δ	CAN1	1079	1080	1	C	DEL	14	Deletion	5	0.357	1		TACTTCCTACGTTTCTACTTCTCCCTTTATTATTGCTATTG	TCT	1
gcn5_5	gcn5Δ	CAN1	1214	1214	1	C	G	16	SNP	8	0.5	1		CCGTATTTTATTTGGTCTATCAAAGAACAAGTTGGCTCCTA	TCA	1
gcn5_7	gcn5Δ	CAN1	1403	1403	1	C	G	15	SNP	7	0.467	1		TTTTGCATGGTTATTTATCTCAATCTCGCACATCAGATTTA	TCA	1
gcn5_8	gcn5Δ	CAN1	1284	1284	1	C	G	17	SNP	8	0.471	1		GTTCCATACATTGCAGTTTTCGTTACTGCTGCATTTGGCGC	TCG	1
gcn5_9	gcn5Δ	CAN1	11	11	1	C	G	18	SNP	14	0.778	1		ATGACAAATTCAAAAGAAGACGCCGACATAG	TCA	1
gnd2_01	gnd2Δ	CAN1	1623	1623	1	G	A	4	SNP	4	1	1		TTCCTGTTCTTAGCTGTTTGGATCTTATTTCAATGCATATT	GGA	1
gnd2_02	gnd2Δ	CAN1	1244	1244	1	C	G	6	SNP	5	0.833	1		GTTGGCTCCTAAATTCCTGTCAAGGACCACCAAAGGTGGTG	TCA	1
gnd2_03	gnd2Δ	CAN1	1195	1195	1	C	T	11	SNP	11	1	1		CAAATATTTACGTTGGTTCCCGTATTTTATTTGGTCTATCA	CCG	0
gnd2_04	gnd2Δ	CAN1	1214	1214	1	C	T	10	SNP	10	1	1		CCGTATTTTATTTGGTCTATCAAAGAACAAGTTGGCTCCTA	TCA	1
gnd2_05	gnd2Δ	CAN1	925	925	1	G	A	9	SNP	9	1	1		TAGTTGGTATCACTGCTGGTGAAGCTGCAAACCCCAGAAAA	TGA	1
gnd2_06	gnd2Δ	CAN1	1163	1163	1	C	T	5	SNP	5	1	1		TATCTTAACAACCATTATTTCTGCCGCAAATTCAAATATTT	TCT	1
gnd2_08	gnd2Δ	CAN1	1214	1214	1	C	G	6	SNP	6	1	1		CCGTATTTTATTTGGTCTATCAAAGAACAAGTTGGCTCCTA	TCA	1
gnd2_09	gnd2Δ	CAN1	1214	1214	1	C	T	6	SNP	6	1	1		CCGTATTTTATTTGGTCTATCAAAGAACAAGTTGGCTCCTA	TCA	1
gnd2_10	gnd2Δ	CAN1	1214	1214	1	C	T	5	SNP	5	1	1		CCGTATTTTATTTGGTCTATCAAAGAACAAGTTGGCTCCTA	TCA	1
gnd2_11	gnd2Δ	CAN1	1214	1214	1	C	T	6	SNP	6	1	1		CCGTATTTTATTTGGTCTATCAAAGAACAAGTTGGCTCCTA	TCA	1
gnd2_12	gnd2Δ	CAN1	979	979	1	C	T	2	SNP	2	1	1		CCATCAAAAAAGTTGTTTTCCGTATCTTAACCTTCTACATT	CCG	0
gnd2_13	gnd2Δ	CAN1	1163	1163	1	C	T	8	SNP	8	1	1		TATCTTAACAACCATTATTTCTGCCGCAAATTCAAATATTT	TCT	1
gnd2_14	gnd2Δ	CAN1	568	568	1	C	G	3	SNP	3	1	4	386	TGGAACTTAGTGTAGTTGGCCAAGTCATTCAATTTTGGACG	CCA	0
gnd2_14	gnd2Δ	CAN1	955	955	1	A	G	3	SNP	3	1	4	7	ACCCCAGAAAATCCGTTCCAAGAGCCATCAAAAAAGTTGTT	AAG	0
gnd2_14	gnd2Δ	CAN1	963	963	1	C	G	3	SNP	3	1	4	250	AAATCCGTTCCAAGAGCCATCAAAAAAGTTGTTTTCCGTAT	TCA	1
gnd2_14	gnd2Δ	CAN1	1214	1214	1	C	G	3	SNP	3	1	4		CCGTATTTTATTTGGTCTATCAAAGAACAAGTTGGCTCCTA	TCA	1
gnd2_15	gnd2Δ	CAN1	626	626	1	G	A	14	SNP	13	0.929	1		GGCATGGATTAGTATTTTTTGGGTAATTATCACAATAATGA	TGG	0
gnd2_16	gnd2Δ	CAN1	925	925	1	G	A	3	SNP	3	1	1		TAGTTGGTATCACTGCTGGTGAAGCTGCAAACCCCAGAAAA	TGA	1
gnd2_17	gnd2Δ	CAN1	979	979	1	C	T	4	SNP	4	1	1		CCATCAAAAAAGTTGTTTTCCGTATCTTAACCTTCTACATT	CCG	0
gnd2_18	gnd2Δ	CAN1	612	612	1	G	A	6	SNP	6	1	1		AAAGTTCCACTGGCGGCATGGATTAGTATTTTTTGGGTAAT	GGA	1
gnd2_19	gnd2Δ	CAN1	452	452	1	C	T	10	SNP	9	0.9	1		TACATTCACCCCTGTTACATCCTCTTTCACAGTGTTCTCAC	TCC	1
gnd2_20	gnd2Δ	CAN1	1623	1623	1	G	A	16	SNP	16	1	1		TTCCTGTTCTTAGCTGTTTGGATCTTATTTCAATGCATATT	GGA	1
gnd2_21	gnd2Δ	CAN1	577	577	1	C	T	7	SNP	7	1	1		GTGTAGTTGGCCAAGTCATTCAATTTTGGACGTACAAAGTT	TCA	1
gnd2_22	gnd2Δ	CAN1	979	979	1	C	T	19	SNP	18	0.947	1		CCATCAAAAAAGTTGTTTTCCGTATCTTAACCTTCTACATT	CCG	0
gnd2_23	gnd2Δ	CAN1	892	892	1	C	T	5	SNP	5	1	1		TTAACGCTGCCTTCACATTTCAAGGTACTGAACTAGTTGGT	TCA	1
gnd2_24	gnd2Δ	CAN1	612	612	1	G	A	28	SNP	28	1	1		AAAGTTCCACTGGCGGCATGGATTAGTATTTTTTGGGTAAT	GGA	1
gnd2_25	gnd2Δ	CAN1	901	901	1	G	A	6	SNP	6	1	1		CCTTCACATTTCAAGGTACTGAACTAGTTGGTATCACTGCT	TGA	1
gnd2_26	gnd2Δ	CAN1	1409	1409	1	C	G	12	SNP	12	1	1		ATGGTTATTTATCTCAATCTCGCACATCAGATTTATGCAAG	TCG	1
gnd2_27	gnd2Δ	CAN1	1537	1537	1	C	T	26	SNP	26	1	1		TGACGATCATTATCATTATTCAAGGTTTCACGGCTTTTGCA	TCA	1
gnd2_28	gnd2Δ	CAN1	527	527	1	C	T	28	SNP	28	1	1		TGGTTACATGTATTGGTTTTCTTGGGCAATCACTTTTGCCC	TCT	1
gnd2_29	gnd2Δ	CAN1	973	973	1	G	T	31	SNP	29	0.935	2	4	CAAGAGCCATCAAAAAAGTTGTTTTCCGTATCTTAACCTTC	TGT	0
gnd2_29	gnd2Δ	CAN1	978	978	1	C	T	31	SNP	30	0.968	2		GCCATCAAAAAAGTTGTTTTCCGTATCTTAACCTTCTACAT	TCC	1
gnd2_30	gnd2Δ	CAN1	1175	1175	1	C	G	36	SNP	36	1	1		CATTATTTCTGCCGCAAATTCAAATATTTACGTTGGTTCCC	TCA	1
gnd2_31	gnd2Δ	CAN1	374	374	1	C	G	16	SNP	16	1	1		CCCAGTGGGCGCTCTTATATCATATTTATTTATGGGTTCTT	TCA	1
gnd2_32	gnd2Δ	CAN1	1214	1214	1	C	T	20	SNP	20	1	1		CCGTATTTTATTTGGTCTATCAAAGAACAAGTTGGCTCCTA	TCA	1
gnd2_33	gnd2Δ	CAN1	1214	1214	1	C	G	10	SNP	10	1	1		CCGTATTTTATTTGGTCTATCAAAGAACAAGTTGGCTCCTA	TCA	1
gnd2_34	gnd2Δ	CAN1	611	611	1	G	A	35	SNP	34	0.971	1		CAAAGTTCCACTGGCGGCATGGATTAGTATTTTTTGGGTAA	TGG	0
gnd2_35	gnd2Δ	CAN1	1409	1409	1	C	G	7	SNP	7	1	1		ATGGTTATTTATCTCAATCTCGCACATCAGATTTATGCAAG	TCG	1
gnd2_36	gnd2Δ	CAN1	577	577	1	C	T	21	SNP	20	0.952	1		GTGTAGTTGGCCAAGTCATTCAATTTTGGACGTACAAAGTT	TCA	1
gnd2_37	gnd2Δ	CAN1	1623	1623	1	G	A	24	SNP	23	0.958	1		TTCCTGTTCTTAGCTGTTTGGATCTTATTTCAATGCATATT	GGA	1
gnd2_38	gnd2Δ	CAN1	585	585	1	G	A	11	SNP	10	0.909	1		GGCCAAGTCATTCAATTTTGGACGTACAAAGTTCCACTGGC	GGA	1
gnd2_39	gnd2Δ	CAN1	1175	1175	1	C	T	5	SNP	5	1	1		CATTATTTCTGCCGCAAATTCAAATATTTACGTTGGTTCCC	TCA	1
gnd2_40	gnd2Δ	CAN1	1537	1537	1	C	T	3	SNP	3	1	1		TGACGATCATTATCATTATTCAAGGTTTCACGGCTTTTGCA	TCA	1
gnd2_41	gnd2Δ	CAN1	1195	1195	1	C	T	2	SNP	2	1	1		CAAATATTTACGTTGGTTCCCGTATTTTATTTGGTCTATCA	CCG	0
gnd2_42	gnd2Δ	CAN1	925	925	1	G	A	10	SNP	10	1	1		TAGTTGGTATCACTGCTGGTGAAGCTGCAAACCCCAGAAAA	TGA	1
gnd2_43	gnd2Δ	CAN1	1244	1244	1	C	G	9	SNP	9	1	1		GTTGGCTCCTAAATTCCTGTCAAGGACCACCAAAGGTGGTG	TCA	1
gnd2_44	gnd2Δ	CAN1	1163	1163	1	C	T	3	SNP	3	1	1		TATCTTAACAACCATTATTTCTGCCGCAAATTCAAATATTT	TCT	1
gnd2_45	gnd2Δ	CAN1	979	979	1	C	T	10	SNP	10	1	1		CCATCAAAAAAGTTGTTTTCCGTATCTTAACCTTCTACATT	CCG	0
gnd2_46	gnd2Δ	CAN1	1487	1487	1	C	T	6	SNP	5	0.833	1		ATTTAAAGCTAAATTAATGCCCGGCTTGGCTTATTATGCGG	CCC	0
gnd2_47	gnd2Δ	CAN1	1391	1391	1	G	A	15	SNP	15	1	1		TGTTGCAGGCTTTTTTGCATGGTTATTTATCTCAATCTCGC	TGG	0
hmg1_1	hmg1Δ	CAN1	52	52	1	G	T	10	SNP	6	0.6	1		AGGAGAAGCATATGTACAATGAGCCGGTCACAACCCTCTTT	TGA	1
hmg1_10	hmg1Δ	CAN1	1175	1175	1	C	G	6	SNP	2	0.333	1		CATTATTTCTGCCGCAAATTCAAATATTTACGTTGGTTCCC	TCA	1
hmg1_14	hmg1Δ	CAN1	1244	1244	1	C	A	36	SNP	36	1	1		GTTGGCTCCTAAATTCCTGTCAAGGACCACCAAAGGTGGTG	TCA	1
hmg1_15	hmg1Δ	CAN1	1163	1163	1	C	T	101	SNP	92	0.911	1		TATCTTAACAACCATTATTTCTGCCGCAAATTCAAATATTT	TCT	1
hmg1_17	hmg1Δ	CAN1	1163	1163	1	C	T	40	SNP	34	0.85	1		TATCTTAACAACCATTATTTCTGCCGCAAATTCAAATATTT	TCT	1
hmg1_18	hmg1Δ	CAN1	1537	1537	1	C	T	46	SNP	44	0.957	1		TGACGATCATTATCATTATTCAAGGTTTCACGGCTTTTGCA	TCA	1
hmg1_19	hmg1Δ	CAN1	1175	1175	1	C	G	34	SNP	34	1	1		CATTATTTCTGCCGCAAATTCAAATATTTACGTTGGTTCCC	TCA	1
hmg1_20	hmg1Δ	CAN1	1214	1214	1	C	G	4	SNP	2	0.5	1		CCGTATTTTATTTGGTCTATCAAAGAACAAGTTGGCTCCTA	TCA	1
hmg1_21	hmg1Δ	CAN1	1214	1214	1	C	T	7	SNP	3	0.429	1		CCGTATTTTATTTGGTCTATCAAAGAACAAGTTGGCTCCTA	TCA	1
hmg1_22	hmg1Δ	CAN1	577	577	1	C	T	7	SNP	4	0.571	1		GTGTAGTTGGCCAAGTCATTCAATTTTGGACGTACAAAGTT	TCA	1
hmg1_23	hmg1Δ	CAN1	679	679	1	G	A	6	SNP	6	1	1		TCAAATATTACGGTGAATTCGAGTTCTGGGTCGCTTCCATC	CGA	1
hmg1_26	hmg1Δ	CAN1	1403	1403	1	C	G	4	SNP	2	0.5	1		TTTTGCATGGTTATTTATCTCAATCTCGCACATCAGATTTA	TCA	1
hmg1_28	hmg1Δ	CAN1	1403	1403	1	C	G	4	SNP	2	0.5	1		TTTTGCATGGTTATTTATCTCAATCTCGCACATCAGATTTA	TCA	1
hmg1_3	hmg1Δ	CAN1	963	963	1	C	T	7	SNP	3	0.429	1		AAATCCGTTCCAAGAGCCATCAAAAAAGTTGTTTTCCGTAT	TCA	1
hmg1_31	hmg1Δ	CAN1	577	577	1	C	T	3	SNP	3	1	1		GTGTAGTTGGCCAAGTCATTCAATTTTGGACGTACAAAGTT	TCA	1
hmg1_33	hmg1Δ	CAN1	527	527	1	INS	T	6	Insertion	2	0.333	2	0	GGTTACATGTATTGGTTTTCTTGGGCAATCACTTTTGCCC		0
hmg1_33	hmg1Δ	CAN1	527	527	1	C	A	6	SNP	2	0.333	2		TGGTTACATGTATTGGTTTTCTTGGGCAATCACTTTTGCCC	TCT	1
hmg1_34	hmg1Δ	CAN1	1214	1214	1	C	G	4	SNP	2	0.5	1		CCGTATTTTATTTGGTCTATCAAAGAACAAGTTGGCTCCTA	TCA	1
hmg1_35	hmg1Δ	CAN1	1403	1403	1	C	G	13	SNP	8	0.615	1		TTTTGCATGGTTATTTATCTCAATCTCGCACATCAGATTTA	TCA	1
hmg1_36	hmg1Δ	CAN1	113	113	1	C	G	3	SNP	2	0.667	1		AACACACCACAGACGTGGGTCAATACCATTAAAAGATGAGA	TCA	1
hmg1_4	hmg1Δ	CAN1	1244	1244	1	C	G	5	SNP	4	0.8	1		GTTGGCTCCTAAATTCCTGTCAAGGACCACCAAAGGTGGTG	TCA	1
hmg1_41	hmg1Δ	CAN1	978	978	1	C	T	3	SNP	3	1	1		GCCATCAAAAAAGTTGTTTTCCGTATCTTAACCTTCTACAT	TCC	1
hmg1_43	hmg1Δ	CAN1	1175	1175	1	C	G	2	SNP	2	1	1		CATTATTTCTGCCGCAAATTCAAATATTTACGTTGGTTCCC	TCA	1
hmg1_48	hmg1Δ	CAN1	1403	1403	1	C	G	3	SNP	2	0.667	1		TTTTGCATGGTTATTTATCTCAATCTCGCACATCAGATTTA	TCA	1
hmg1_5	hmg1Δ	CAN1	1214	1214	1	C	G	5	SNP	5	1	1		CCGTATTTTATTTGGTCTATCAAAGAACAAGTTGGCTCCTA	TCA	1
hmg1_7	hmg1Δ	CAN1	1214	1214	1	C	G	2	SNP	2	1	1		CCGTATTTTATTTGGTCTATCAAAGAACAAGTTGGCTCCTA	TCA	1
hmg1_8	hmg1Δ	CAN1	311	311	1	C	A	3	SNP	3	1	1		CCTTGGTGGTACTATTGGTACAGGTCTTTTCATTGGTTTAT	ACA	0
hmg1_9	hmg1Δ	CAN1	11	11	1	C	G	12	SNP	12	1	1		ATGACAAATTCAAAAGAAGACGCCGACATAG	TCA	1
hos1_101	hos1Δ	CAN1	892	892	1	C	T	22	SNP	21	0.955	2	282	TTAACGCTGCCTTCACATTTCAAGGTACTGAACTAGTTGGT	TCA	1
hos1_101	hos1Δ	CAN1	1175	1175	1	C	G	22	SNP	22	1	2		CATTATTTCTGCCGCAAATTCAAATATTTACGTTGGTTCCC	TCA	1
hos1_102	hos1Δ	CAN1	452	452	1	C	T	23	SNP	22	0.957	1		TACATTCACCCCTGTTACATCCTCTTTCACAGTGTTCTCAC	TCC	1
hos1_103	hos1Δ	CAN1	1193	1193	1	C	T	21	SNP	20	0.952	1		TTCAAATATTTACGTTGGTTCCCGTATTTTATTTGGTCTAT	TCC	1
hos1_104	hos1Δ	CAN1	530	530	1	G	A	11	SNP	11	1	1		TTACATGTATTGGTTTTCTTGGGCAATCACTTTTGCCCTGG	TGG	0
hos1_105	hos1Δ	CAN1	1175	1175	1	C	G	16	SNP	16	1	1		CATTATTTCTGCCGCAAATTCAAATATTTACGTTGGTTCCC	TCA	1
hos1_106	hos1Δ	CAN1	11	11	1	C	G	9	SNP	9	1	3	1351	ATGACAAATTCAAAAGAAGACGCCGACATAG	TCA	1
hos1_106	hos1Δ	CAN1	1363	1363	1	A	G	9	SNP	9	1	3	39	TTTTCGAATGGCTATTAAATATCACTGGTGTTGCAGGCTTT	TAT	0
hos1_106	hos1Δ	CAN1	1403	1403	1	C	T	9	SNP	9	1	3		TTTTGCATGGTTATTTATCTCAATCTCGCACATCAGATTTA	TCA	1
hos1_107	hos1Δ	CAN1	1537	1537	1	C	T	33	SNP	32	0.97	1		TGACGATCATTATCATTATTCAAGGTTTCACGGCTTTTGCA	TCA	1
hos1_108	hos1Δ	CAN1	113	113	1	C	G	14	SNP	14	1	2	47	AACACACCACAGACGTGGGTCAATACCATTAAAAGATGAGA	TCA	1
hos1_108	hos1Δ	CAN1	161	161	1	C	G	14	SNP	14	1	2		AGAATTGTATCCATTGCGCTCTTTCCCGACGAGAGTAAATG	TCT	1
hos1_109	hos1Δ	CAN1	468	468	1	INS	T	23	Insertion	23	1	2	0	ACATCCTCTTTCACAGTGTTCTCACAAAGATTCCTTTCTC		0
hos1_109	hos1Δ	CAN1	468	468	1	C	G	23	SNP	23	1	2		ACATCCTCTTTCACAGTGTTCTCACAAAGATTCCTTTCTCC	TCT	1
hos1_110	hos1Δ	CAN1	1403	1403	1	C	G	16	SNP	15	0.938	1		TTTTGCATGGTTATTTATCTCAATCTCGCACATCAGATTTA	TCA	1
hos1_111	hos1Δ	CAN1	424	424	1	G	A	14	SNP	14	1	1		CTGTCACGCAGTCCTTGGGTGAAATGGCTACATTCACCCCT	TGA	1
hos1_112	hos1Δ	CAN1	1623	1623	1	G	A	19	SNP	19	1	1		TTCCTGTTCTTAGCTGTTTGGATCTTATTTCAATGCATATT	GGA	1
hos1_113	hos1Δ	CAN1	788	788	1	G	A	28	SNP	25	0.893	1		CCCAGTTGGATTCCGTTATTGGAGAAACCCAGGTGCCTGGG	TGG	0
hos1_49	hos1Δ	CAN1	577	577	1	C	T	8	SNP	7	0.875	2	706	GTGTAGTTGGCCAAGTCATTCAATTTTGGACGTACAAAGTT	TCA	1
hos1_49	hos1Δ	CAN1	1284	1284	1	C	T	8	SNP	7	0.875	2		GTTCCATACATTGCAGTTTTCGTTACTGCTGCATTTGGCGC	TCG	1
hos1_50	hos1Δ	CAN1	1214	1214	1	C	G	8	SNP	8	1	1		CCGTATTTTATTTGGTCTATCAAAGAACAAGTTGGCTCCTA	TCA	1
hos1_51	hos1Δ	CAN1	1644	1644	1	C	G	14	SNP	9	0.643	1		ATCTTATTTCAATGCATATTCAGATGCAGATTTATTTGGAA	TCA	1
hos1_53	hos1Δ	CAN1	1214	1214	1	C	G	7	SNP	5	0.714	1		CCGTATTTTATTTGGTCTATCAAAGAACAAGTTGGCTCCTA	TCA	1
hos1_59	hos1Δ	CAN1	612	612	1	G	A	3	SNP	2	0.667	1		AAAGTTCCACTGGCGGCATGGATTAGTATTTTTTGGGTAAT	GGA	1
hos1_60	hos1Δ	CAN1	922	922	1	G	A	7	SNP	5	0.714	1		AACTAGTTGGTATCACTGCTGGTGAAGCTGCAAACCCCAGA	TGG	0
hos1_64	hos1Δ	CAN1	550	550	1	G	C	2	SNP	2	1	1		GGGCAATCACTTTTGCCCTGGAACTTAGTGTAGTTGGCCAA	GGA	1
hos1_65	hos1Δ	CAN1	1244	1244	1	C	G	2	SNP	2	1	1		GTTGGCTCCTAAATTCCTGTCAAGGACCACCAAAGGTGGTG	TCA	1
hos1_66	hos1Δ	CAN1	530	530	1	G	C	6	SNP	6	1	1		TTACATGTATTGGTTTTCTTGGGCAATCACTTTTGCCCTGG	TGG	0
hos1_67	hos1Δ	CAN1	963	963	1	C	G	2	SNP	2	1	1		AAATCCGTTCCAAGAGCCATCAAAAAAGTTGTTTTCCGTAT	TCA	1
hos1_68	hos1Δ	CAN1	1378	1378	1	G	A	6	SNP	6	1	2	39	TAAATATCACTGGTGTTGCAGGCTTTTTTGCATGGTTATTT	AGG	0
hos1_68	hos1Δ	CAN1	1418	1418	1	G	T	6	SNP	6	1	2		TATCTCAATCTCGCACATCAGATTTATGCAAGCTTTGAAAT	AGA	1
hos1_70	hos1Δ	CAN1	527	528	1	C	DEL	4	Deletion	3	0.75	1		TGGTTACATGTATTGGTTTTCTTGGGCAATCACTTTTGCCC	TCT	1
hos1_72	hos1Δ	CAN1	1214	1214	1	C	T	7	SNP	7	1	1		CCGTATTTTATTTGGTCTATCAAAGAACAAGTTGGCTCCTA	TCA	1
hos1_74	hos1Δ	CAN1	113	113	1	C	G	6	SNP	4	0.667	1		AACACACCACAGACGTGGGTCAATACCATTAAAAGATGAGA	TCA	1
hos1_75	hos1Δ	CAN1	1268	1268	1	C	G	7	SNP	6	0.857	1		GACCACCAAAGGTGGTGTTCCATACATTGCAGTTTTCGTTA	CCA	0
hos1_76	hos1Δ	CAN1	531	531	1	G	C	4	SNP	3	0.75	1		TACATGTATTGGTTTTCTTGGGCAATCACTTTTGCCCTGGA	GGG	0
hos1_77	hos1Δ	CAN1	901	901	1	G	A	4	SNP	3	0.75	1		CCTTCACATTTCAAGGTACTGAACTAGTTGGTATCACTGCT	TGA	1
hos1_78	hos1Δ	CAN1	612	612	1	G	A	12	SNP	10	0.833	1		AAAGTTCCACTGGCGGCATGGATTAGTATTTTTTGGGTAAT	GGA	1
hos1_79	hos1Δ	CAN1	1193	1193	1	C	T	3	SNP	2	0.667	1		TTCAAATATTTACGTTGGTTCCCGTATTTTATTTGGTCTAT	TCC	1
hos1_81	hos1Δ	CAN1	1214	1214	1	C	G	3	SNP	3	1	1		CCGTATTTTATTTGGTCTATCAAAGAACAAGTTGGCTCCTA	TCA	1
hos1_82	hos1Δ	CAN1	1172	1172	1	A	T	5	SNP	3	0.6	1		AACCATTATTTCTGCCGCAAATTCAAATATTTACGTTGGTT	AAT	0
hos1_83	hos1Δ	CAN1	11	11	1	C	G	12	SNP	7	0.583	1		ATGACAAATTCAAAAGAAGACGCCGACATAG	TCA	1
hos1_85	hos1Δ	CAN1	470	470	1	C	G	6	SNP	3	0.5	1		ATCCTCTTTCACAGTGTTCTCACAAAGATTCCTTTCTCCAG	TCA	1
hos1_87	hos1Δ	CAN1	1175	1175	1	C	G	5	SNP	5	1	1		CATTATTTCTGCCGCAAATTCAAATATTTACGTTGGTTCCC	TCA	1
hos1_88	hos1Δ	CAN1	113	113	1	C	G	2	SNP	2	1	1		AACACACCACAGACGTGGGTCAATACCATTAAAAGATGAGA	TCA	1
hos1_91	hos1Δ	CAN1	452	452	1	C	A	4	SNP	4	1	1		TACATTCACCCCTGTTACATCCTCTTTCACAGTGTTCTCAC	TCC	1
hos1_92	hos1Δ	CAN1	527	527	1	C	A	9	SNP	6	0.667	1		TGGTTACATGTATTGGTTTTCTTGGGCAATCACTTTTGCCC	TCT	1
hst1_1	hst1Δ	CAN1	1175	1175	1	C	T	14	SNP	8	0.571	1		CATTATTTCTGCCGCAAATTCAAATATTTACGTTGGTTCCC	TCA	1
hst1_13	hst1Δ	CAN1	673	673	1	G	A	8	SNP	4	0.5	1		TCCCTGTCAAATATTACGGTGAATTCGAGTTCTGGGTCGCT	TGA	1
hst1_14	hst1Δ	CAN1	577	577	1	C	T	12	SNP	3	0.25	1		GTGTAGTTGGCCAAGTCATTCAATTTTGGACGTACAAAGTT	TCA	1
hst1_16	hst1Δ	CAN1	1175	1175	1	C	T	5	SNP	4	0.8	1		CATTATTTCTGCCGCAAATTCAAATATTTACGTTGGTTCCC	TCA	1
hst1_18	hst1Δ	CAN1	1268	1269	1	C	DEL	7	Deletion	4	0.571	1		GACCACCAAAGGTGGTGTTCCATACATTGCAGTTTTCGTTA	CCA	0
hst1_19	hst1Δ	CAN1	1537	1537	1	C	T	8	SNP	2	0.25	1		TGACGATCATTATCATTATTCAAGGTTTCACGGCTTTTGCA	TCA	1
hst1_20	hst1Δ	CAN1	452	452	1	C	T	8	SNP	5	0.625	1		TACATTCACCCCTGTTACATCCTCTTTCACAGTGTTCTCAC	TCC	1
hst1_21	hst1Δ	CAN1	1175	1175	1	C	T	9	SNP	7	0.778	1		CATTATTTCTGCCGCAAATTCAAATATTTACGTTGGTTCCC	TCA	1
hst1_24	hst1Δ	CAN1	1163	1163	1	C	T	10	SNP	4	0.4	1		TATCTTAACAACCATTATTTCTGCCGCAAATTCAAATATTT	TCT	1
hst1_25	hst1Δ	CAN1	1195	1196	1	C	DEL	11	Deletion	6	0.545	1		CAAATATTTACGTTGGTTCCCGTATTTTATTTGGTCTATCA	CCG	0
hst1_26	hst1Δ	CAN1	612	612	1	G	A	8	SNP	3	0.375	1		AAAGTTCCACTGGCGGCATGGATTAGTATTTTTTGGGTAAT	GGA	1
hst1_27	hst1Δ	CAN1	1193	1193	1	C	T	4	SNP	2	0.5	1		TTCAAATATTTACGTTGGTTCCCGTATTTTATTTGGTCTAT	TCC	1
hst1_29	hst1Δ	CAN1	1193	1193	1	C	T	10	SNP	4	0.4	1		TTCAAATATTTACGTTGGTTCCCGTATTTTATTTGGTCTAT	TCC	1
hst1_3	hst1Δ	CAN1	452	452	1	C	T	18	SNP	6	0.333	1		TACATTCACCCCTGTTACATCCTCTTTCACAGTGTTCTCAC	TCC	1
hst1_38	hst1Δ	CAN1	530	530	1	G	A	2	SNP	2	1	1		TTACATGTATTGGTTTTCTTGGGCAATCACTTTTGCCCTGG	TGG	0
hst1_40	hst1Δ	CAN1	901	901	1	G	A	10	SNP	6	0.6	1		CCTTCACATTTCAAGGTACTGAACTAGTTGGTATCACTGCT	TGA	1
hst1_41	hst1Δ	CAN1	925	925	1	G	A	4	SNP	3	0.75	1		TAGTTGGTATCACTGCTGGTGAAGCTGCAAACCCCAGAAAA	TGA	1
hst1_42	hst1Δ	CAN1	550	550	1	G	A	10	SNP	3	0.3	1		GGGCAATCACTTTTGCCCTGGAACTTAGTGTAGTTGGCCAA	GGA	1
hst1_43	hst1Δ	CAN1	568	568	1	C	T	10	SNP	5	0.5	1		TGGAACTTAGTGTAGTTGGCCAAGTCATTCAATTTTGGACG	CCA	0
hst1_44	hst1Δ	CAN1	1193	1193	1	C	T	7	SNP	3	0.429	1		TTCAAATATTTACGTTGGTTCCCGTATTTTATTTGGTCTAT	TCC	1
hst1_45	hst1Δ	CAN1	527	527	1	C	T	8	SNP	2	0.25	1		TGGTTACATGTATTGGTTTTCTTGGGCAATCACTTTTGCCC	TCT	1
hst1_46	hst1Δ	CAN1	892	892	1	C	T	6	SNP	2	0.333	1		TTAACGCTGCCTTCACATTTCAAGGTACTGAACTAGTTGGT	TCA	1
hst1_47	hst1Δ	CAN1	892	892	1	C	T	9	SNP	4	0.444	1		TTAACGCTGCCTTCACATTTCAAGGTACTGAACTAGTTGGT	TCA	1
hst1_5	hst1Δ	CAN1	1214	1214	1	C	G	22	SNP	9	0.409	1		CCGTATTTTATTTGGTCTATCAAAGAACAAGTTGGCTCCTA	TCA	1
hst1_8	hst1Δ	CAN1	901	901	1	G	A	6	SNP	2	0.333	1		CCTTCACATTTCAAGGTACTGAACTAGTTGGTATCACTGCT	TGA	1
hst3_01	hst3Δ	CAN1	527	527	1	C	T	80	SNP	67	0.838	1		TGGTTACATGTATTGGTTTTCTTGGGCAATCACTTTTGCCC	TCT	1
hst3_05	hst3Δ	CAN1	699	699	1	C	G	66	SNP	64	0.97	1		GAGTTCTGGGTCGCTTCCATCAAAGTTTTAGCCATTATCGG	TCA	1
hst3_08	hst3Δ	CAN1	1214	1214	1	C	T	26	SNP	24	0.923	1		CCGTATTTTATTTGGTCTATCAAAGAACAAGTTGGCTCCTA	TCA	1
hst3_09	hst3Δ	CAN1	1018	1018	1	G	C	29	SNP	27	0.931	1		TTGGCTCTCTATTATTCATTGGACTTTTAGTTCCATACAAT	TGG	0
hst3_10	hst3Δ	CAN1	577	577	1	C	T	51	SNP	48	0.941	1		GTGTAGTTGGCCAAGTCATTCAATTTTGGACGTACAAAGTT	TCA	1
hst3_11	hst3Δ	CAN1	392	392	1	C	T	26	SNP	20	0.769	1		ATCATATTTATTTATGGGTTCTTTGGCATATTCTGTCACGC	TCT	1
hst3_12	hst3Δ	CAN1	788	788	1	G	A	3	SNP	2	0.667	1		CCCAGTTGGATTCCGTTATTGGAGAAACCCAGGTGCCTGGG	TGG	0
hst3_13	hst3Δ	CAN1	1403	1403	1	C	G	36	SNP	34	0.944	1		TTTTGCATGGTTATTTATCTCAATCTCGCACATCAGATTTA	TCA	1
hst3_15	hst3Δ	CAN1	1537	1537	1	C	T	7	SNP	3	0.429	1		TGACGATCATTATCATTATTCAAGGTTTCACGGCTTTTGCA	TCA	1
hst3_16	hst3Δ	CAN1	452	452	1	C	T	75	SNP	74	0.987	1		TACATTCACCCCTGTTACATCCTCTTTCACAGTGTTCTCAC	TCC	1
hst3_17	hst3Δ	CAN1	1214	1214	1	C	G	57	SNP	50	0.877	1		CCGTATTTTATTTGGTCTATCAAAGAACAAGTTGGCTCCTA	TCA	1
hst3_18	hst3Δ	CAN1	724	725	1	C	DEL	23	Deletion	20	0.87	1		TTTTAGCCATTATCGGGTTTCTAATATACTGTTTTTGTATG	TCT	1
hst3_2	hst3Δ	CAN1	1195	1195	1	C	T	5	SNP	2	0.4	1		CAAATATTTACGTTGGTTCCCGTATTTTATTTGGTCTATCA	CCG	0
hst3_20	hst3Δ	CAN1	892	892	1	INS	T	78	Insertion	66	0.846	2	0	TAACGCTGCCTTCACATTTCAAGGTACTGAACTAGTTGGT		0
hst3_20	hst3Δ	CAN1	892	892	1	C	G	78	SNP	66	0.846	2		TTAACGCTGCCTTCACATTTCAAGGTACTGAACTAGTTGGT	TCA	1
hst3_21	hst3Δ	CAN1	374	374	1	C	G	61	SNP	55	0.902	1		CCCAGTGGGCGCTCTTATATCATATTTATTTATGGGTTCTT	TCA	1
hst3_22	hst3Δ	CAN1	452	452	1	C	T	42	SNP	40	0.952	1		TACATTCACCCCTGTTACATCCTCTTTCACAGTGTTCTCAC	TCC	1
hst3_25	hst3Δ	CAN1	527	527	1	C	T	34	SNP	31	0.912	1		TGGTTACATGTATTGGTTTTCTTGGGCAATCACTTTTGCCC	TCT	1
hst3_28	hst3Δ	CAN1	130	130	1	G	C	64	SNP	62	0.969	2	237	GGTCAATACCATTAAAAGATGAGAAAAGTAAAGAATTGTAT	TGA	1
hst3_28	hst3Δ	CAN1	368	368	1	T	A	64	SNP	62	0.969	2		CGCCGGCCCAGTGGGCGCTCTTATATCATATTTATTTATGG	CTT	0
hst3_29	hst3Δ	CAN1	1459	1459	1	G	T	25	SNP	21	0.84	1		ACCGTGGCATCTCTCGTGACGAGTTACCATTTAAAGCTAAA	CGA	1
hst3_32	hst3Δ	CAN1	1633	1634	1	C	DEL	86	Deletion	63	0.733	1		TAGCTGTTTGGATCTTATTTCAATGCATATTCAGATGCAGA	TCA	1
hst3_34	hst3Δ	CAN1	1214	1214	1	C	G	32	SNP	21	0.656	1		CCGTATTTTATTTGGTCTATCAAAGAACAAGTTGGCTCCTA	TCA	1
hst3_35	hst3Δ	CAN1	455	455	1	C	T	20	SNP	14	0.7	1		ATTCACCCCTGTTACATCCTCTTTCACAGTGTTCTCACAAA	TCT	1
hst3_37	hst3Δ	CAN1	11	11	1	C	G	109	SNP	108	0.991	1		ATGACAAATTCAAAAGAAGACGCCGACATAG	TCA	1
hst3_39	hst3Δ	CAN1	374	374	1	C	G	101	SNP	97	0.96	1		CCCAGTGGGCGCTCTTATATCATATTTATTTATGGGTTCTT	TCA	1
hst3_41	hst3Δ	CAN1	862	862	1	T	A	4	SNP	2	0.5	1		GGAGGTTCTTAGGTTGGGTTTCCTCTTTGATTAACGCTGCC	TTC	0
hst3_43	hst3Δ	CAN1	1403	1403	1	C	G	2	SNP	2	1	1		TTTTGCATGGTTATTTATCTCAATCTCGCACATCAGATTTA	TCA	1
hst3_44	hst3Δ	CAN1	679	679	1	G	A	57	SNP	56	0.982	1		TCAAATATTACGGTGAATTCGAGTTCTGGGTCGCTTCCATC	CGA	1
hst3_45	hst3Δ	CAN1	442	442	1	C	T	62	SNP	62	1	1		GTGAAATGGCTACATTCACCCCTGTTACATCCTCTTTCACA	CCC	0
hst3_46	hst3Δ	CAN1	455	455	1	C	T	78	SNP	67	0.859	1		ATTCACCCCTGTTACATCCTCTTTCACAGTGTTCTCACAAA	TCT	1
hst3_47	hst3Δ	CAN1	374	374	2	INS	AT	19	Insertion	17	0.895	1		CCAGTGGGCGCTCTTATATCATATTTATTTATGGGTTCTT		0
hst3_6	hst3Δ	CAN1	1195	1195	1	C	T	5	SNP	2	0.4	1		CAAATATTTACGTTGGTTCCCGTATTTTATTTGGTCTATCA	CCG	0
hst3b_1	hst3Δ	CAN1	113	113	1	C	G	24	SNP	7	0.292	1		AACACACCACAGACGTGGGTCAATACCATTAAAAGATGAGA	TCA	1
hst3b_11	hst3Δ	CAN1	374	374	1	C	G	8	SNP	3	0.375	1		CCCAGTGGGCGCTCTTATATCATATTTATTTATGGGTTCTT	TCA	1
hst3b_12	hst3Δ	CAN1	1214	1214	1	C	T	24	SNP	8	0.333	1		CCGTATTTTATTTGGTCTATCAAAGAACAAGTTGGCTCCTA	TCA	1
hst3b_13	hst3Δ	CAN1	1214	1214	1	C	G	14	SNP	8	0.571	1		CCGTATTTTATTTGGTCTATCAAAGAACAAGTTGGCTCCTA	TCA	1
hst3b_14	hst3Δ	CAN1	1244	1244	1	C	G	13	SNP	5	0.385	1		GTTGGCTCCTAAATTCCTGTCAAGGACCACCAAAGGTGGTG	TCA	1
hst3b_15	hst3Δ	CAN1	374	374	1	C	G	20	SNP	11	0.55	1		CCCAGTGGGCGCTCTTATATCATATTTATTTATGGGTTCTT	TCA	1
hst3b_16	hst3Δ	CAN1	374	374	1	C	G	5	SNP	2	0.4	1		CCCAGTGGGCGCTCTTATATCATATTTATTTATGGGTTCTT	TCA	1
hst3b_17	hst3Δ	CAN1	1214	1214	1	C	G	24	SNP	17	0.708	1		CCGTATTTTATTTGGTCTATCAAAGAACAAGTTGGCTCCTA	TCA	1
hst3b_18	hst3Δ	CAN1	1401	1401	1	C	T	12	SNP	3	0.25	1		TTTTTTGCATGGTTATTTATCTCAATCTCGCACATCAGATT	TCT	1
hst3b_19	hst3Δ	CAN1	1214	1214	1	C	G	10	SNP	7	0.7	1		CCGTATTTTATTTGGTCTATCAAAGAACAAGTTGGCTCCTA	TCA	1
hst3b_2	hst3Δ	CAN1	1214	1214	1	C	T	13	SNP	5	0.385	1		CCGTATTTTATTTGGTCTATCAAAGAACAAGTTGGCTCCTA	TCA	1
hst3b_20	hst3Δ	CAN1	1537	1537	1	C	T	9	SNP	5	0.556	1		TGACGATCATTATCATTATTCAAGGTTTCACGGCTTTTGCA	TCA	1
hst3b_21	hst3Δ	CAN1	1349	1349	1	INS	G	15	Insertion	7	0.467	1		GGTGGTGACAAAGTTTTCGAATGGCTATTAAATATCACTG		0
hst3b_22	hst3Δ	CAN1	1347	1347	1	INS	T	8	Insertion	5	0.625	2	0	CTGGTGGTGACAAAGTTTTCGAATGGCTATTAAATATCAC		0
hst3b_22	hst3Δ	CAN1	1347	1347	1	C	G	8	SNP	5	0.625	2		ACTGGTGGTGACAAAGTTTTCGAATGGCTATTAAATATCAC	TCG	1
hst3b_23	hst3Δ	CAN1	1244	1244	1	C	G	8	SNP	4	0.5	1		GTTGGCTCCTAAATTCCTGTCAAGGACCACCAAAGGTGGTG	TCA	1
hst3b_25	hst3Δ	CAN1	1214	1214	1	C	G	11	SNP	7	0.636	1		CCGTATTTTATTTGGTCTATCAAAGAACAAGTTGGCTCCTA	TCA	1
hst3b_26	hst3Δ	CAN1	577	577	1	C	T	14	SNP	8	0.571	1		GTGTAGTTGGCCAAGTCATTCAATTTTGGACGTACAAAGTT	TCA	1
hst3b_27	hst3Δ	CAN1	1244	1244	1	C	G	14	SNP	7	0.5	1		GTTGGCTCCTAAATTCCTGTCAAGGACCACCAAAGGTGGTG	TCA	1
hst3b_29	hst3Δ	CAN1	113	113	1	C	G	6	SNP	4	0.667	1		AACACACCACAGACGTGGGTCAATACCATTAAAAGATGAGA	TCA	1
hst3b_3	hst3Δ	CAN1	577	577	1	C	T	32	SNP	12	0.375	1		GTGTAGTTGGCCAAGTCATTCAATTTTGGACGTACAAAGTT	TCA	1
hst3b_31	hst3Δ	CAN1	11	11	1	C	G	8	SNP	4	0.5	1		ATGACAAATTCAAAAGAAGACGCCGACATAG	TCA	1
hst3b_32	hst3Δ	CAN1	979	980	1	C	DEL	9	Deletion	8	0.889	1		CCATCAAAAAAGTTGTTTTCCGTATCTTAACCTTCTACATT	CCG	0
hst3b_33	hst3Δ	CAN1	1403	1403	1	C	G	18	SNP	6	0.333	1		TTTTGCATGGTTATTTATCTCAATCTCGCACATCAGATTTA	TCA	1
hst3b_35	hst3Δ	CAN1	1214	1214	1	C	G	15	SNP	4	0.267	1		CCGTATTTTATTTGGTCTATCAAAGAACAAGTTGGCTCCTA	TCA	1
hst3b_37	hst3Δ	CAN1	1195	1195	1	C	T	18	SNP	6	0.333	1		CAAATATTTACGTTGGTTCCCGTATTTTATTTGGTCTATCA	CCG	0
hst3b_38	hst3Δ	CAN1	1214	1214	1	C	G	16	SNP	11	0.688	1		CCGTATTTTATTTGGTCTATCAAAGAACAAGTTGGCTCCTA	TCA	1
hst3b_4	hst3Δ	CAN1	1403	1403	1	C	G	14	SNP	7	0.5	1		TTTTGCATGGTTATTTATCTCAATCTCGCACATCAGATTTA	TCA	1
hst3b_40	hst3Δ	CAN1	925	925	1	G	A	16	SNP	9	0.563	1		TAGTTGGTATCACTGCTGGTGAAGCTGCAAACCCCAGAAAA	TGA	1
hst3b_41	hst3Δ	CAN1	374	374	1	C	T	15	SNP	9	0.6	1		CCCAGTGGGCGCTCTTATATCATATTTATTTATGGGTTCTT	TCA	1
hst3b_42	hst3Δ	CAN1	1175	1175	1	C	G	7	SNP	2	0.286	1		CATTATTTCTGCCGCAAATTCAAATATTTACGTTGGTTCCC	TCA	1
hst3b_44	hst3Δ	CAN1	892	892	1	C	T	20	SNP	10	0.5	1		TTAACGCTGCCTTCACATTTCAAGGTACTGAACTAGTTGGT	TCA	1
hst3b_46	hst3Δ	CAN1	1214	1214	1	C	G	21	SNP	16	0.762	1		CCGTATTTTATTTGGTCTATCAAAGAACAAGTTGGCTCCTA	TCA	1
hst3b_47	hst3Δ	CAN1	1214	1214	1	C	G	12	SNP	9	0.75	1		CCGTATTTTATTTGGTCTATCAAAGAACAAGTTGGCTCCTA	TCA	1
hst3b_48	hst3Δ	CAN1	1403	1403	1	C	G	8	SNP	6	0.75	1		TTTTGCATGGTTATTTATCTCAATCTCGCACATCAGATTTA	TCA	1
hst3b_5	hst3Δ	CAN1	1623	1623	1	G	A	35	SNP	11	0.314	1		TTCCTGTTCTTAGCTGTTTGGATCTTATTTCAATGCATATT	GGA	1
hst3b_7	hst3Δ	CAN1	374	374	1	C	G	10	SNP	3	0.3	1		CCCAGTGGGCGCTCTTATATCATATTTATTTATGGGTTCTT	TCA	1
hst3b_8	hst3Δ	CAN1	1347	1347	1	C	T	20	SNP	5	0.25	1		ACTGGTGGTGACAAAGTTTTCGAATGGCTATTAAATATCAC	TCG	1
hst3b_9	hst3Δ	CAN1	374	374	1	C	G	8	SNP	5	0.625	1		CCCAGTGGGCGCTCTTATATCATATTTATTTATGGGTTCTT	TCA	1
hst3, asf1_1	hst3, asf1Δ	CAN1	1214	1214	1	C	G	10	SNP	8	0.8	1		CCGTATTTTATTTGGTCTATCAAAGAACAAGTTGGCTCCTA	TCA	1
hst3, asf1_10	hst3, asf1Δ	CAN1	452	452	1	C	T	17	SNP	7	0.412	1		TACATTCACCCCTGTTACATCCTCTTTCACAGTGTTCTCAC	TCC	1
hst3, asf1_11	hst3, asf1Δ	CAN1	1163	1163	1	C	A	14	SNP	8	0.571	1		TATCTTAACAACCATTATTTCTGCCGCAAATTCAAATATTT	TCT	1
hst3, asf1_12	hst3, asf1Δ	CAN1	809	810	1	G	DEL	23	Deletion	9	0.391	1		GAGAAACCCAGGTGCCTGGGGTCCAGGTATAATATCTAAGG	GGT	0
hst3, asf1_13	hst3, asf1Δ	CAN1	1214	1214	1	C	T	22	SNP	11	0.5	1		CCGTATTTTATTTGGTCTATCAAAGAACAAGTTGGCTCCTA	TCA	1
hst3, asf1_14	hst3, asf1Δ	CAN1	470	470	1	C	G	15	SNP	9	0.6	1		ATCCTCTTTCACAGTGTTCTCACAAAGATTCCTTTCTCCAG	TCA	1
hst3, asf1_15	hst3, asf1Δ	CAN1	1537	1537	1	C	T	8	SNP	3	0.375	1		TGACGATCATTATCATTATTCAAGGTTTCACGGCTTTTGCA	TCA	1
hst3, asf1_17	hst3, asf1Δ	CAN1	1537	1537	1	C	T	11	SNP	8	0.727	1		TGACGATCATTATCATTATTCAAGGTTTCACGGCTTTTGCA	TCA	1
hst3, asf1_18	hst3, asf1Δ	CAN1	1633	1633	1	C	T	6	SNP	4	0.667	1		TAGCTGTTTGGATCTTATTTCAATGCATATTCAGATGCAGA	TCA	1
hst3, asf1_19	hst3, asf1Δ	CAN1	1214	1214	1	C	T	24	SNP	14	0.583	1		CCGTATTTTATTTGGTCTATCAAAGAACAAGTTGGCTCCTA	TCA	1
hst3, asf1_2	hst3, asf1Δ	CAN1	1670	1670	1	G	C	10	SNP	4	0.4	1		CAGATTTATTTGGAAGATTGGAGATGTCGACATCGATTCCG	GGA	1
hst3, asf1_20	hst3, asf1Δ	CAN1	885	885	1	C	G	6	SNP	2	0.333	4	321	TCTTTGATTAACGCTGCCTTCACATTTCAAGGTACTGAACT	TCA	1
hst3, asf1_20	hst3, asf1Δ	CAN1	1207	1207	1	G	T	6	SNP	2	0.333	4	2	TTGGTTCCCGTATTTTATTTGGTCTATCAAAGAACAAGTTG	TGG	0
hst3, asf1_20	hst3, asf1Δ	CAN1	1210	1210	1	C	T	6	SNP	2	0.333	4	1	GTTCCCGTATTTTATTTGGTCTATCAAAGAACAAGTTGGCT	TCT	1
hst3, asf1_20	hst3, asf1Δ	CAN1	1212	1212	1	INS	T	6	Insertion	2	0.333	4		TCCCGTATTTTATTTGGTCTATCAAAGAACAAGTTGGCTC		0
hst3, asf1_21	hst3, asf1Δ	CAN1	1633	1633	1	C	T	16	SNP	4	0.25	1		TAGCTGTTTGGATCTTATTTCAATGCATATTCAGATGCAGA	TCA	1
hst3, asf1_22	hst3, asf1Δ	CAN1	901	901	1	G	A	12	SNP	5	0.417	1		CCTTCACATTTCAAGGTACTGAACTAGTTGGTATCACTGCT	TGA	1
hst3, asf1_23	hst3, asf1Δ	CAN1	892	892	1	C	T	10	SNP	5	0.5	1		TTAACGCTGCCTTCACATTTCAAGGTACTGAACTAGTTGGT	TCA	1
hst3, asf1_24	hst3, asf1Δ	CAN1	1598	1600	2	CT	DEL	7	Deletion	4	0.571	1		CTTTGCTGCCGCCTATATCTCTGTTTTCCTGTTCTTAGCTGT		0
hst3, asf1_26	hst3, asf1Δ	CAN1	1630	1630	1	T	A	8	SNP	2	0.25	2	2	TCTTAGCTGTTTGGATCTTATTTCAATGCATATTCAGATGC	ATT	0
hst3, asf1_26	hst3, asf1Δ	CAN1	1633	1633	1	C	T	8	SNP	2	0.25	2		TAGCTGTTTGGATCTTATTTCAATGCATATTCAGATGCAGA	TCA	1
hst3, asf1_27	hst3, asf1Δ	CAN1	901	901	1	G	A	4	SNP	2	0.5	1		CCTTCACATTTCAAGGTACTGAACTAGTTGGTATCACTGCT	TGA	1
hst3, asf1_28	hst3, asf1Δ	CAN1	470	470	1	C	G	6	SNP	3	0.5	1		ATCCTCTTTCACAGTGTTCTCACAAAGATTCCTTTCTCCAG	TCA	1
hst3, asf1_29	hst3, asf1Δ	CAN1	896	897	1	G	DEL	17	Deletion	6	0.353	1		CGCTGCCTTCACATTTCAAGGTACTGAACTAGTTGGTATCA	GGT	0
hst3, asf1_3	hst3, asf1Δ	CAN1	1537	1537	1	C	T	10	SNP	6	0.6	1		TGACGATCATTATCATTATTCAAGGTTTCACGGCTTTTGCA	TCA	1
hst3, asf1_30	hst3, asf1Δ	CAN1	1175	1175	1	C	G	14	SNP	5	0.357	1		CATTATTTCTGCCGCAAATTCAAATATTTACGTTGGTTCCC	TCA	1
hst3, asf1_31	hst3, asf1Δ	CAN1	1268	1268	1	C	G	11	SNP	5	0.455	1		GACCACCAAAGGTGGTGTTCCATACATTGCAGTTTTCGTTA	CCA	0
hst3, asf1_32	hst3, asf1Δ	CAN1	1018	1018	1	G	A	12	SNP	3	0.25	1		TTGGCTCTCTATTATTCATTGGACTTTTAGTTCCATACAAT	TGG	0
hst3, asf1_33	hst3, asf1Δ	CAN1	1403	1403	1	C	G	18	SNP	8	0.444	1		TTTTGCATGGTTATTTATCTCAATCTCGCACATCAGATTTA	TCA	1
hst3, asf1_34	hst3, asf1Δ	CAN1	1004	1004	1	C	T	12	SNP	6	0.5	1		CTTAACCTTCTACATTGGCTCTCTATTATTCATTGGACTTT	TCT	1
hst3, asf1_37	hst3, asf1Δ	CAN1	1195	1196	1	C	DEL	11	Deletion	6	0.545	1		CAAATATTTACGTTGGTTCCCGTATTTTATTTGGTCTATCA	CCG	0
hst3, asf1_39	hst3, asf1Δ	CAN1	15	16	1	A	DEL	7	Deletion	4	0.571	1		ATGACAAATTCAAAAGAAGACGCCGACATAGAGGA	AAG	0
hst3, asf1_4	hst3, asf1Δ	CAN1	452	452	1	C	T	7	SNP	2	0.286	1		TACATTCACCCCTGTTACATCCTCTTTCACAGTGTTCTCAC	TCC	1
hst3, asf1_40	hst3, asf1Δ	CAN1	577	577	1	C	T	4	SNP	2	0.5	1		GTGTAGTTGGCCAAGTCATTCAATTTTGGACGTACAAAGTT	TCA	1
hst3, asf1_41	hst3, asf1Δ	CAN1	1175	1175	1	C	G	9	SNP	4	0.444	1		CATTATTTCTGCCGCAAATTCAAATATTTACGTTGGTTCCC	TCA	1
hst3, asf1_43	hst3, asf1Δ	CAN1	1214	1214	1	C	G	16	SNP	8	0.5	1		CCGTATTTTATTTGGTCTATCAAAGAACAAGTTGGCTCCTA	TCA	1
hst3, asf1_45	hst3, asf1Δ	CAN1	1633	1633	1	C	T	15	SNP	4	0.267	1		TAGCTGTTTGGATCTTATTTCAATGCATATTCAGATGCAGA	TCA	1
hst3, asf1_46	hst3, asf1Δ	CAN1	1214	1214	1	C	T	20	SNP	10	0.5	1		CCGTATTTTATTTGGTCTATCAAAGAACAAGTTGGCTCCTA	TCA	1
hst3, asf1_48	hst3, asf1Δ	CAN1	1403	1403	1	C	G	11	SNP	8	0.727	1		TTTTGCATGGTTATTTATCTCAATCTCGCACATCAGATTTA	TCA	1
hst3, asf1_5	hst3, asf1Δ	CAN1	1214	1214	1	C	G	12	SNP	4	0.333	1		CCGTATTTTATTTGGTCTATCAAAGAACAAGTTGGCTCCTA	TCA	1
hst3, asf1_6	hst3, asf1Δ	CAN1	1193	1193	1	C	T	5	SNP	3	0.6	1		TTCAAATATTTACGTTGGTTCCCGTATTTTATTTGGTCTAT	TCC	1
hst3, asf1_7	hst3, asf1Δ	CAN1	901	901	1	G	A	13	SNP	4	0.308	1		CCTTCACATTTCAAGGTACTGAACTAGTTGGTATCACTGCT	TGA	1
hst3, asf1_9	hst3, asf1Δ	CAN1	1193	1193	1	C	T	18	SNP	5	0.278	1		TTCAAATATTTACGTTGGTTCCCGTATTTTATTTGGTCTAT	TCC	1
hst4_1	hst4Δ	CAN1	1175	1175	1	C	G	18	SNP	12	0.667	1		CATTATTTCTGCCGCAAATTCAAATATTTACGTTGGTTCCC	TCA	1
hst4_10	hst4Δ	CAN1	1073	1074	1	C	DEL	4	Deletion	3	0.75	1		ACAATCTACTTCCTACGTTTCTACTTCTCCCTTTATTATTG	TCT	1
hst4_101	hst4Δ	CAN1	1214	1214	1	C	T	12	SNP	10	0.833	1		CCGTATTTTATTTGGTCTATCAAAGAACAAGTTGGCTCCTA	TCA	1
hst4_102	hst4Δ	CAN1	11	11	1	C	G	14	SNP	14	1	1		ATGACAAATTCAAAAGAAGACGCCGACATAG	TCA	1
hst4_103	hst4Δ	CAN1	577	577	1	C	T	11	SNP	11	1	1		GTGTAGTTGGCCAAGTCATTCAATTTTGGACGTACAAAGTT	TCA	1
hst4_104	hst4Δ	CAN1	1537	1537	1	C	T	20	SNP	20	1	1		TGACGATCATTATCATTATTCAAGGTTTCACGGCTTTTGCA	TCA	1
hst4_105	hst4Δ	CAN1	577	577	1	C	T	17	SNP	13	0.765	1		GTGTAGTTGGCCAAGTCATTCAATTTTGGACGTACAAAGTT	TCA	1
hst4_106	hst4Δ	CAN1	1537	1537	1	C	T	12	SNP	12	1	1		TGACGATCATTATCATTATTCAAGGTTTCACGGCTTTTGCA	TCA	1
hst4_107	hst4Δ	CAN1	452	452	1	C	T	5	SNP	5	1	1		TACATTCACCCCTGTTACATCCTCTTTCACAGTGTTCTCAC	TCC	1
hst4_108	hst4Δ	CAN1	1214	1214	1	C	G	22	SNP	22	1	1		CCGTATTTTATTTGGTCTATCAAAGAACAAGTTGGCTCCTA	TCA	1
hst4_109	hst4Δ	CAN1	1214	1214	1	C	T	20	SNP	19	0.95	1		CCGTATTTTATTTGGTCTATCAAAGAACAAGTTGGCTCCTA	TCA	1
hst4_11	hst4Δ	CAN1	1537	1537	1	C	T	9	SNP	4	0.444	1		TGACGATCATTATCATTATTCAAGGTTTCACGGCTTTTGCA	TCA	1
hst4_110	hst4Δ	CAN1	925	925	1	G	A	12	SNP	12	1	1		TAGTTGGTATCACTGCTGGTGAAGCTGCAAACCCCAGAAAA	TGA	1
hst4_111	hst4Δ	CAN1	925	925	1	G	A	21	SNP	21	1	1		TAGTTGGTATCACTGCTGGTGAAGCTGCAAACCCCAGAAAA	TGA	1
hst4_112	hst4Δ	CAN1	550	550	1	G	A	9	SNP	7	0.778	1		GGGCAATCACTTTTGCCCTGGAACTTAGTGTAGTTGGCCAA	GGA	1
hst4_113	hst4Δ	CAN1	679	679	1	G	A	8	SNP	7	0.875	1		TCAAATATTACGGTGAATTCGAGTTCTGGGTCGCTTCCATC	CGA	1
hst4_114	hst4Δ	CAN1	443	443	1	C	T	6	SNP	6	1	1		TGAAATGGCTACATTCACCCCTGTTACATCCTCTTTCACAG	CCT	0
hst4_115	hst4Δ	CAN1	530	530	1	G	A	12	SNP	12	1	1		TTACATGTATTGGTTTTCTTGGGCAATCACTTTTGCCCTGG	TGG	0
hst4_116	hst4Δ	CAN1	901	901	1	G	A	8	SNP	8	1	1		CCTTCACATTTCAAGGTACTGAACTAGTTGGTATCACTGCT	TGA	1
hst4_117	hst4Δ	CAN1	1537	1537	1	C	T	14	SNP	14	1	1		TGACGATCATTATCATTATTCAAGGTTTCACGGCTTTTGCA	TCA	1
hst4_118	hst4Δ	CAN1	452	452	1	C	T	7	SNP	7	1	1		TACATTCACCCCTGTTACATCCTCTTTCACAGTGTTCTCAC	TCC	1
hst4_12	hst4Δ	CAN1	1175	1175	1	C	T	13	SNP	4	0.308	1		CATTATTTCTGCCGCAAATTCAAATATTTACGTTGGTTCCC	TCA	1
hst4_14	hst4Δ	CAN1	352	352	1	G	A	14	SNP	10	0.714	1		CCACACCTCTGACCAACGCCGGCCCAGTGGGCGCTCTTATA	CGG	0
hst4_15	hst4Δ	CAN1	892	892	1	C	T	5	SNP	4	0.8	1		TTAACGCTGCCTTCACATTTCAAGGTACTGAACTAGTTGGT	TCA	1
hst4_19	hst4Δ	CAN1	656	656	1	C	T	20	SNP	6	0.3	1		CACAATAATGAACTTGTTCCCTGTCAAATATTACGGTGAAT	CCT	0
hst4_20	hst4Δ	CAN1	1214	1214	1	C	T	7	SNP	4	0.571	1		CCGTATTTTATTTGGTCTATCAAAGAACAAGTTGGCTCCTA	TCA	1
hst4_21	hst4Δ	CAN1	452	452	1	C	T	12	SNP	5	0.417	1		TACATTCACCCCTGTTACATCCTCTTTCACAGTGTTCTCAC	TCC	1
hst4_24	hst4Δ	CAN1	1537	1537	1	C	T	4	SNP	2	0.5	1		TGACGATCATTATCATTATTCAAGGTTTCACGGCTTTTGCA	TCA	1
hst4_25	hst4Δ	CAN1	1004	1004	1	C	T	3	SNP	2	0.667	1		CTTAACCTTCTACATTGGCTCTCTATTATTCATTGGACTTT	TCT	1
hst4_27	hst4Δ	CAN1	577	577	1	C	T	5	SNP	3	0.6	1		GTGTAGTTGGCCAAGTCATTCAATTTTGGACGTACAAAGTT	TCA	1
hst4_29	hst4Δ	CAN1	1175	1175	1	C	T	16	SNP	5	0.313	1		CATTATTTCTGCCGCAAATTCAAATATTTACGTTGGTTCCC	TCA	1
hst4_30	hst4Δ	CAN1	892	892	1	C	T	14	SNP	11	0.786	1		TTAACGCTGCCTTCACATTTCAAGGTACTGAACTAGTTGGT	TCA	1
hst4_32	hst4Δ	CAN1	1633	1633	1	C	T	7	SNP	2	0.286	1		TAGCTGTTTGGATCTTATTTCAATGCATATTCAGATGCAGA	TCA	1
hst4_33	hst4Δ	CAN1	1214	1214	1	C	T	12	SNP	5	0.417	1		CCGTATTTTATTTGGTCTATCAAAGAACAAGTTGGCTCCTA	TCA	1
hst4_34	hst4Δ	CAN1	1163	1163	1	C	T	7	SNP	2	0.286	1		TATCTTAACAACCATTATTTCTGCCGCAAATTCAAATATTT	TCT	1
hst4_36	hst4Δ	CAN1	1244	1244	1	C	G	7	SNP	2	0.286	1		GTTGGCTCCTAAATTCCTGTCAAGGACCACCAAAGGTGGTG	TCA	1
hst4_37	hst4Δ	CAN1	374	374	1	C	G	3	SNP	2	0.667	1		CCCAGTGGGCGCTCTTATATCATATTTATTTATGGGTTCTT	TCA	1
hst4_38	hst4Δ	CAN1	1214	1214	1	C	T	5	SNP	2	0.4	1		CCGTATTTTATTTGGTCTATCAAAGAACAAGTTGGCTCCTA	TCA	1
hst4_42	hst4Δ	CAN1	857	857	1	G	A	15	SNP	9	0.6	1		CGAAGGGAGGTTCTTAGGTTGGGTTTCCTCTTTGATTAACG	TGG	0
hst4_44	hst4Δ	CAN1	455	455	1	C	T	19	SNP	6	0.316	1		ATTCACCCCTGTTACATCCTCTTTCACAGTGTTCTCACAAA	TCT	1
hst4_45	hst4Δ	CAN1	626	626	1	INS	T	15	Insertion	5	0.333	1		GCATGGATTAGTATTTTTTGGGTAATTATCACAATAATGA		0
hst4_46	hst4Δ	CAN1	939	940	1	C	DEL	8	Deletion	4	0.5	1		GCTGGTGAAGCTGCAAACCCCAGAAAATCCGTTCCAAGAGC	CCA	0
hst4_8	hst4Δ	CAN1	673	673	1	G	A	6	SNP	2	0.333	1		TCCCTGTCAAATATTACGGTGAATTCGAGTTCTGGGTCGCT	TGA	1
hst4_9	hst4Δ	CAN1	1163	1163	1	C	T	5	SNP	2	0.4	1		TATCTTAACAACCATTATTTCTGCCGCAAATTCAAATATTT	TCT	1
ies2_11	ies2Δ	CAN1	374	374	1	C	A	23	SNP	10	0.435	1		CCCAGTGGGCGCTCTTATATCATATTTATTTATGGGTTCTT	TCA	1
ies2_14	ies2Δ	CAN1	679	679	1	G	A	4	SNP	3	0.75	1		TCAAATATTACGGTGAATTCGAGTTCTGGGTCGCTTCCATC	CGA	1
ies2_16	ies2Δ	CAN1	1244	1244	1	C	G	9	SNP	3	0.333	1		GTTGGCTCCTAAATTCCTGTCAAGGACCACCAAAGGTGGTG	TCA	1
ies2_17	ies2Δ	CAN1	938	938	1	C	G	11	SNP	5	0.455	1		TGCTGGTGAAGCTGCAAACCCCAGAAAATCCGTTCCAAGAG	CCC	0
ies2_18	ies2Δ	CAN1	1605	1605	1	INS	T	8	Insertion	4	0.5	2	0	CCGCCTATATCTCTGTTTTCCTGTTCTTAGCTGTTTGGAT		0
ies2_18	ies2Δ	CAN1	1605	1605	1	C	G	8	SNP	4	0.5	2		GCCGCCTATATCTCTGTTTTCCTGTTCTTAGCTGTTTGGAT	TCC	1
ies2_19	ies2Δ	CAN1	1244	1244	1	C	G	9	SNP	5	0.556	1		GTTGGCTCCTAAATTCCTGTCAAGGACCACCAAAGGTGGTG	TCA	1
ies2_2	ies2Δ	CAN1	836	837	1	A	DEL	9	Deletion	4	0.444	1		TATAATATCTAAGGATAAAAACGAAGGGAGGTTCTTAGGTT	AAC	0
ies2_21	ies2Δ	CAN1	1537	1537	1	C	T	11	SNP	4	0.364	1		TGACGATCATTATCATTATTCAAGGTTTCACGGCTTTTGCA	TCA	1
ies2_26	ies2Δ	CAN1	11	11	1	C	G	3	SNP	2	0.667	1		ATGACAAATTCAAAAGAAGACGCCGACATAG	TCA	1
ies2_27	ies2Δ	CAN1	1626	1626	1	C	G	6	SNP	2	0.333	1		CTGTTCTTAGCTGTTTGGATCTTATTTCAATGCATATTCAG	TCT	1
ies2_28	ies2Δ	CAN1	1409	1409	1	C	G	15	SNP	4	0.267	1		ATGGTTATTTATCTCAATCTCGCACATCAGATTTATGCAAG	TCG	1
ies2_29	ies2Δ	CAN1	1193	1193	1	C	T	14	SNP	5	0.357	1		TTCAAATATTTACGTTGGTTCCCGTATTTTATTTGGTCTAT	TCC	1
ies2_3	ies2Δ	CAN1	1606	1607	1	C	DEL	5	Deletion	4	0.8	1		CCGCCTATATCTCTGTTTTCCTGTTCTTAGCTGTTTGGATC	CCT	0
ies2_30	ies2Δ	CAN1	1175	1175	1	C	G	11	SNP	4	0.364	1		CATTATTTCTGCCGCAAATTCAAATATTTACGTTGGTTCCC	TCA	1
ies2_31	ies2Δ	CAN1	1244	1244	1	C	G	9	SNP	6	0.667	1		GTTGGCTCCTAAATTCCTGTCAAGGACCACCAAAGGTGGTG	TCA	1
ies2_32	ies2Δ	CAN1	720	721	1	G	DEL	5	Deletion	3	0.6	1		AAAGTTTTAGCCATTATCGGGTTTCTAATATACTGTTTTTG	GGT	0
ies2_35	ies2Δ	CAN1	1163	1163	1	C	T	2	SNP	2	1	1		TATCTTAACAACCATTATTTCTGCCGCAAATTCAAATATTT	TCT	1
ies2_36	ies2Δ	CAN1	1214	1214	1	C	G	5	SNP	3	0.6	1		CCGTATTTTATTTGGTCTATCAAAGAACAAGTTGGCTCCTA	TCA	1
ies2_37	ies2Δ	CAN1	892	892	1	C	T	8	SNP	2	0.25	1		TTAACGCTGCCTTCACATTTCAAGGTACTGAACTAGTTGGT	TCA	1
ies2_38	ies2Δ	CAN1	452	452	1	C	A	2	SNP	2	1	1		TACATTCACCCCTGTTACATCCTCTTTCACAGTGTTCTCAC	TCC	1
ies2_4	ies2Δ	CAN1	1214	1214	1	C	G	14	SNP	7	0.5	1		CCGTATTTTATTTGGTCTATCAAAGAACAAGTTGGCTCCTA	TCA	1
ies2_41	ies2Δ	CAN1	455	455	1	C	T	9	SNP	4	0.444	1		ATTCACCCCTGTTACATCCTCTTTCACAGTGTTCTCACAAA	TCT	1
ies2_42	ies2Δ	CAN1	1214	1214	1	C	G	8	SNP	8	1	1		CCGTATTTTATTTGGTCTATCAAAGAACAAGTTGGCTCCTA	TCA	1
ies2_46	ies2Δ	CAN1	455	455	1	C	T	4	SNP	2	0.5	2	675	ATTCACCCCTGTTACATCCTCTTTCACAGTGTTCTCACAAA	TCT	1
ies2_46	ies2Δ	CAN1	1131	1131	1	C	G	4	SNP	2	0.5	2		ACAAAGGTTTTGCCACATATCTTCAACGCTGTTATCTTAAC	TCT	1
ies2_47	ies2Δ	CAN1	1395	1395	1	A	T	9	SNP	8	0.889	2	5	GCAGGCTTTTTTGCATGGTTATTTATCTCAATCTCGCACAT	TAT	0
ies2_47	ies2Δ	CAN1	1401	1401	1	C	G	9	SNP	8	0.889	2		TTTTTTGCATGGTTATTTATCTCAATCTCGCACATCAGATT	TCT	1
ies2_5	ies2Δ	CAN1	568	568	1	C	T	14	SNP	7	0.5	1		TGGAACTTAGTGTAGTTGGCCAAGTCATTCAATTTTGGACG	CCA	0
ies2_6	ies2Δ	CAN1	11	11	1	C	G	6	SNP	2	0.333	1		ATGACAAATTCAAAAGAAGACGCCGACATAG	TCA	1
ies2_7	ies2Δ	CAN1	1214	1214	1	C	G	3	SNP	2	0.667	1		CCGTATTTTATTTGGTCTATCAAAGAACAAGTTGGCTCCTA	TCA	1
ies2_8	ies2Δ	CAN1	669	669	1	C	A	17	SNP	7	0.412	1		TTGTTCCCTGTCAAATATTACGGTGAATTCGAGTTCTGGGT	ACG	0
ixr1_73	ixr1Δ	CAN1	612	612	1	G	A	8	SNP	7	0.875	1		AAAGTTCCACTGGCGGCATGGATTAGTATTTTTTGGGTAAT	GGA	1
ixr1_74	ixr1Δ	CAN1	1633	1633	1	C	T	11	SNP	8	0.727	1		TAGCTGTTTGGATCTTATTTCAATGCATATTCAGATGCAGA	TCA	1
ixr1_75	ixr1Δ	CAN1	1214	1214	1	C	G	10	SNP	7	0.7	1		CCGTATTTTATTTGGTCTATCAAAGAACAAGTTGGCTCCTA	TCA	1
ixr1_76	ixr1Δ	CAN1	789	789	1	G	A	7	SNP	6	0.857	1		CCAGTTGGATTCCGTTATTGGAGAAACCCAGGTGCCTGGGG	GGA	1
ixr1_77	ixr1Δ	CAN1	113	113	1	C	G	8	SNP	6	0.75	1		AACACACCACAGACGTGGGTCAATACCATTAAAAGATGAGA	TCA	1
ixr1_78	ixr1Δ	CAN1	577	577	1	C	T	6	SNP	4	0.667	1		GTGTAGTTGGCCAAGTCATTCAATTTTGGACGTACAAAGTT	TCA	1
ixr1_81	ixr1Δ	CAN1	1403	1403	1	C	G	27	SNP	24	0.889	1		TTTTGCATGGTTATTTATCTCAATCTCGCACATCAGATTTA	TCA	1
ixr1_83	ixr1Δ	CAN1	1537	1537	1	C	T	11	SNP	8	0.727	1		TGACGATCATTATCATTATTCAAGGTTTCACGGCTTTTGCA	TCA	1
ixr1_84	ixr1Δ	CAN1	1623	1623	1	G	A	11	SNP	6	0.545	1		TTCCTGTTCTTAGCTGTTTGGATCTTATTTCAATGCATATT	GGA	1
ixr1_85	ixr1Δ	CAN1	979	979	1	C	T	6	SNP	5	0.833	1		CCATCAAAAAAGTTGTTTTCCGTATCTTAACCTTCTACATT	CCG	0
ixr1_86	ixr1Δ	CAN1	356	356	1	C	T	6	SNP	6	1	1		ACCTCTGACCAACGCCGGCCCAGTGGGCGCTCTTATATCAT	CCA	0
ixr1_88	ixr1Δ	CAN1	612	612	1	G	A	5	SNP	4	0.8	1		AAAGTTCCACTGGCGGCATGGATTAGTATTTTTTGGGTAAT	GGA	1
ixr1_89	ixr1Δ	CAN1	356	356	1	C	G	9	SNP	7	0.778	2	35	ACCTCTGACCAACGCCGGCCCAGTGGGCGCTCTTATATCAT	CCA	0
ixr1_89	ixr1Δ	CAN1	392	392	1	C	G	9	SNP	7	0.778	2		ATCATATTTATTTATGGGTTCTTTGGCATATTCTGTCACGC	TCT	1
ixr1_90	ixr1Δ	CAN1	1157	1157	1	T	A	2	SNP	2	1	2	5	CGCTGTTATCTTAACAACCATTATTTCTGCCGCAAATTCAA	ATT	0
ixr1_90	ixr1Δ	CAN1	1163	1163	1	C	T	2	SNP	2	1	2		TATCTTAACAACCATTATTTCTGCCGCAAATTCAAATATTT	TCT	1
ixr1_92	ixr1Δ	CAN1	1633	1633	1	INS	T	5	Insertion	4	0.8	2	0	AGCTGTTTGGATCTTATTTCAATGCATATTCAGATGCAGA		0
ixr1_92	ixr1Δ	CAN1	1633	1633	1	C	G	5	SNP	4	0.8	2		TAGCTGTTTGGATCTTATTTCAATGCATATTCAGATGCAGA	TCA	1
ixr1_93	ixr1Δ	CAN1	424	424	1	G	A	9	SNP	6	0.667	1		CTGTCACGCAGTCCTTGGGTGAAATGGCTACATTCACCCCT	TGA	1
ixr1_94	ixr1Δ	CAN1	963	963	1	C	T	10	SNP	8	0.8	1		AAATCCGTTCCAAGAGCCATCAAAAAAGTTGTTTTCCGTAT	TCA	1
ixr1_96	ixr1Δ	CAN1	979	979	1	C	T	12	SNP	7	0.583	1		CCATCAAAAAAGTTGTTTTCCGTATCTTAACCTTCTACATT	CCG	0
lds2_101	lds2Δ	CAN1	530	530	1	G	T	16	SNP	16	1	1		TTACATGTATTGGTTTTCTTGGGCAATCACTTTTGCCCTGG	TGG	0
lds2_102	lds2Δ	CAN1	449	449	1	C	A	16	SNP	15	0.938	2	5	GGCTACATTCACCCCTGTTACATCCTCTTTCACAGTGTTCT	ACA	0
lds2_102	lds2Δ	CAN1	455	455	1	C	T	16	SNP	15	0.938	2		ATTCACCCCTGTTACATCCTCTTTCACAGTGTTCTCACAAA	TCT	1
lds2_103	lds2Δ	CAN1	1214	1214	1	C	G	17	SNP	17	1	1		CCGTATTTTATTTGGTCTATCAAAGAACAAGTTGGCTCCTA	TCA	1
lds2_104	lds2Δ	CAN1	1004	1004	1	C	A	26	SNP	26	1	2	53	CTTAACCTTCTACATTGGCTCTCTATTATTCATTGGACTTT	TCT	1
lds2_104	lds2Δ	CAN1	1058	1058	1	C	G	26	SNP	26	1	2		TGACCCTAAACTAACACAATCTACTTCCTACGTTTCTACTT	TCT	1
lds2_105	lds2Δ	CAN1	113	113	1	C	G	22	SNP	22	1	1		AACACACCACAGACGTGGGTCAATACCATTAAAAGATGAGA	TCA	1
lds2_106	lds2Δ	CAN1	1214	1214	1	C	G	14	SNP	14	1	1		CCGTATTTTATTTGGTCTATCAAAGAACAAGTTGGCTCCTA	TCA	1
lds2_107	lds2Δ	CAN1	82	82	1	G	T	43	SNP	41	0.953	1		CAACCCTCTTTCACGACGTTGAAGCTTCACAAACACACCAC	TGA	1
lds2_108	lds2Δ	CAN1	984	984	1	C	T	28	SNP	27	0.964	2	552	AAAAAAGTTGTTTTCCGTATCTTAACCTTCTACATTGGCTC	TCT	1
lds2_108	lds2Δ	CAN1	1537	1537	1	C	T	28	SNP	27	0.964	2		TGACGATCATTATCATTATTCAAGGTTTCACGGCTTTTGCA	TCA	1
lds2_109	lds2Δ	CAN1	1196	1196	1	G	A	20	SNP	20	1	1		AAATATTTACGTTGGTTCCCGTATTTTATTTGGTCTATCAA	CGT	0
lds2_110	lds2Δ	CAN1	1214	1214	1	C	G	17	SNP	17	1	1		CCGTATTTTATTTGGTCTATCAAAGAACAAGTTGGCTCCTA	TCA	1
lds2_111	lds2Δ	CAN1	1214	1214	1	C	G	24	SNP	23	0.958	1		CCGTATTTTATTTGGTCTATCAAAGAACAAGTTGGCTCCTA	TCA	1
lds2_112	lds2Δ	CAN1	1244	1244	1	C	G	18	SNP	17	0.944	1		GTTGGCTCCTAAATTCCTGTCAAGGACCACCAAAGGTGGTG	TCA	1
lds2_113	lds2Δ	CAN1	113	113	1	C	G	21	SNP	21	1	1		AACACACCACAGACGTGGGTCAATACCATTAAAAGATGAGA	TCA	1
lds2_114	lds2Δ	CAN1	374	374	1	C	G	20	SNP	19	0.95	1		CCCAGTGGGCGCTCTTATATCATATTTATTTATGGGTTCTT	TCA	1
lds2_115	lds2Δ	CAN1	1463	1463	1	T	G	21	SNP	19	0.905	1		TGGCATCTCTCGTGACGAGTTACCATTTAAAGCTAAATTAA	TTA	0
lds2_116	lds2Δ	CAN1	455	455	1	C	T	17	SNP	17	1	2	783	ATTCACCCCTGTTACATCCTCTTTCACAGTGTTCTCACAAA	TCT	1
lds2_116	lds2Δ	CAN1	1239	1239	1	C	T	17	SNP	17	1	2		AACAAGTTGGCTCCTAAATTCCTGTCAAGGACCACCAAAGG	TCC	1
lds2_117	lds2Δ	CAN1	1284	1284	1	INS	T	28	Insertion	25	0.893	2	0	TTCCATACATTGCAGTTTTCGTTACTGCTGCATTTGGCGC		0
lds2_117	lds2Δ	CAN1	1284	1284	1	C	G	28	SNP	25	0.893	2		GTTCCATACATTGCAGTTTTCGTTACTGCTGCATTTGGCGC	TCG	1
lds2_118	lds2Δ	CAN1	1163	1163	1	C	T	23	SNP	23	1	1		TATCTTAACAACCATTATTTCTGCCGCAAATTCAAATATTT	TCT	1
lds2_119	lds2Δ	CAN1	438	439	1	C	DEL	11	Deletion	11	1	1		TTGGGTGAAATGGCTACATTCACCCCTGTTACATCCTCTTT	TCA	1
lds2_120	lds2Δ	CAN1	527	527	1	INS	T	29	Insertion	28	0.966	2	0	TGGTTACATGTATTGGTTTTCTTGGGCAATCACTTTTGCC		0
lds2_120	lds2Δ	CAN1	527	527	1	C	G	29	SNP	28	0.966	2		TGGTTACATGTATTGGTTTTCTTGGGCAATCACTTTTGCCC	TCT	1
lds2_122	lds2Δ	CAN1	1267	1267	1	C	G	28	SNP	25	0.893	1		GGACCACCAAAGGTGGTGTTCCATACATTGCAGTTTTCGTT	TCC	1
lds2_123	lds2Δ	CAN1	392	392	1	C	T	7	SNP	6	0.857	3	3	ATCATATTTATTTATGGGTTCTTTGGCATATTCTGTCACGC	TCT	1
lds2_123	lds2Δ	CAN1	396	396	1	INS	T	7	Insertion	6	0.857	3	567	ATTTATTTATGGGTTCTTTGGCATATTCTGTCACGCAGTC		0
lds2_123	lds2Δ	CAN1	963	963	1	C	T	7	SNP	6	0.857	3		AAATCCGTTCCAAGAGCCATCAAAAAAGTTGTTTTCCGTAT	TCA	1
lds2_124	lds2Δ	CAN1	89	89	1	C	G	30	SNP	26	0.867	1		CTTTCACGACGTTGAAGCTTCACAAACACACCACAGACGTG	TCA	1
lds2_125	lds2Δ	CAN1	374	374	1	C	G	21	SNP	21	1	1		CCCAGTGGGCGCTCTTATATCATATTTATTTATGGGTTCTT	TCA	1
lds2_126	lds2Δ	CAN1	1214	1214	1	C	G	8	SNP	4	0.5	2	194	CCGTATTTTATTTGGTCTATCAAAGAACAAGTTGGCTCCTA	TCA	1
lds2_126	lds2Δ	CAN1	1409	1409	1	C	G	8	SNP	4	0.5	2		ATGGTTATTTATCTCAATCTCGCACATCAGATTTATGCAAG	TCG	1
lds2_127	lds2Δ	CAN1	1214	1214	1	C	G	8	SNP	7	0.875	1		CCGTATTTTATTTGGTCTATCAAAGAACAAGTTGGCTCCTA	TCA	1
lds2_128	lds2Δ	CAN1	374	374	1	C	A	7	SNP	6	0.857	1		CCCAGTGGGCGCTCTTATATCATATTTATTTATGGGTTCTT	TCA	1
lds2_13	lds2Δ	CAN1	1214	1214	1	C	G	5	SNP	3	0.6	1		CCGTATTTTATTTGGTCTATCAAAGAACAAGTTGGCTCCTA	TCA	1
lds2_18	lds2Δ	CAN1	113	113	1	C	G	5	SNP	2	0.4	1		AACACACCACAGACGTGGGTCAATACCATTAAAAGATGAGA	TCA	1
lds2_2	lds2Δ	CAN1	1214	1214	1	C	T	6	SNP	3	0.5	1		CCGTATTTTATTTGGTCTATCAAAGAACAAGTTGGCTCCTA	TCA	1
lds2_20	lds2Δ	CAN1	577	577	1	C	T	4	SNP	4	1	1		GTGTAGTTGGCCAAGTCATTCAATTTTGGACGTACAAAGTT	TCA	1
lds2_21	lds2Δ	CAN1	626	626	1	G	A	5	SNP	2	0.4	1		GGCATGGATTAGTATTTTTTGGGTAATTATCACAATAATGA	TGG	0
lds2_29	lds2Δ	CAN1	452	452	1	C	T	8	SNP	5	0.625	1		TACATTCACCCCTGTTACATCCTCTTTCACAGTGTTCTCAC	TCC	1
lds2_3	lds2Δ	CAN1	996	996	1	C	A	4	SNP	2	0.5	1		TTCCGTATCTTAACCTTCTACATTGGCTCTCTATTATTCAT	ACA	0
lds2_30	lds2Δ	CAN1	89	89	1	C	A	7	SNP	2	0.286	1		CTTTCACGACGTTGAAGCTTCACAAACACACCACAGACGTG	TCA	1
lds2_33	lds2Δ	CAN1	1175	1175	1	C	G	4	SNP	4	1	1		CATTATTTCTGCCGCAAATTCAAATATTTACGTTGGTTCCC	TCA	1
lds2_37	lds2Δ	CAN1	1214	1214	1	C	G	6	SNP	4	0.667	1		CCGTATTTTATTTGGTCTATCAAAGAACAAGTTGGCTCCTA	TCA	1
lds2_41	lds2Δ	CAN1	1173	1173	1	INS	A	5	Insertion	3	0.6	2	2	CCATTATTTCTGCCGCAAATTCAAATATTTACGTTGGTTC		0
lds2_41	lds2Δ	CAN1	1175	1175	1	C	G	5	SNP	3	0.6	2		CATTATTTCTGCCGCAAATTCAAATATTTACGTTGGTTCCC	TCA	1
lds2_44	lds2Δ	CAN1	1175	1175	1	C	G	6	SNP	3	0.5	1		CATTATTTCTGCCGCAAATTCAAATATTTACGTTGGTTCCC	TCA	1
lds2_45	lds2Δ	CAN1	1175	1175	1	C	G	5	SNP	3	0.6	1		CATTATTTCTGCCGCAAATTCAAATATTTACGTTGGTTCCC	TCA	1
lge1_01	lge1Δ	CAN1	452	452	1	C	T	58	SNP	56	0.966	1		TACATTCACCCCTGTTACATCCTCTTTCACAGTGTTCTCAC	TCC	1
lge1_02	lge1Δ	CAN1	1403	1403	1	C	G	31	SNP	31	1	1		TTTTGCATGGTTATTTATCTCAATCTCGCACATCAGATTTA	TCA	1
lge1_03	lge1Δ	CAN1	1214	1214	1	C	G	17	SNP	17	1	1		CCGTATTTTATTTGGTCTATCAAAGAACAAGTTGGCTCCTA	TCA	1
lge1_05	lge1Δ	CAN1	1193	1193	1	C	T	31	SNP	30	0.968	1		TTCAAATATTTACGTTGGTTCCCGTATTTTATTTGGTCTAT	TCC	1
lge1_06	lge1Δ	CAN1	577	577	1	C	T	57	SNP	57	1	2	307	GTGTAGTTGGCCAAGTCATTCAATTTTGGACGTACAAAGTT	TCA	1
lge1_06	lge1Δ	CAN1	885	885	1	C	T	57	SNP	57	1	2		TCTTTGATTAACGCTGCCTTCACATTTCAAGGTACTGAACT	TCA	1
lge1_07	lge1Δ	CAN1	1163	1163	1	C	T	10	SNP	7	0.7	1		TATCTTAACAACCATTATTTCTGCCGCAAATTCAAATATTT	TCT	1
lge1_08	lge1Δ	CAN1	1244	1244	1	C	G	46	SNP	45	0.978	1		GTTGGCTCCTAAATTCCTGTCAAGGACCACCAAAGGTGGTG	TCA	1
lge1_10	lge1Δ	CAN1	452	452	1	C	T	9	SNP	6	0.667	1		TACATTCACCCCTGTTACATCCTCTTTCACAGTGTTCTCAC	TCC	1
lge1_11	lge1Δ	CAN1	1214	1214	1	C	G	2	SNP	2	1	1		CCGTATTTTATTTGGTCTATCAAAGAACAAGTTGGCTCCTA	TCA	1
lge1_13	lge1Δ	CAN1	443	443	1	C	G	3	SNP	2	0.667	1		TGAAATGGCTACATTCACCCCTGTTACATCCTCTTTCACAG	CCT	0
lge1_14	lge1Δ	CAN1	113	113	1	C	G	21	SNP	21	1	1		AACACACCACAGACGTGGGTCAATACCATTAAAAGATGAGA	TCA	1
lge1_15	lge1Δ	CAN1	455	455	1	C	T	2	SNP	2	1	1		ATTCACCCCTGTTACATCCTCTTTCACAGTGTTCTCACAAA	TCT	1
lge1_19	lge1Δ	CAN1	1244	1244	1	C	G	4	SNP	2	0.5	1		GTTGGCTCCTAAATTCCTGTCAAGGACCACCAAAGGTGGTG	TCA	1
lge1_20	lge1Δ	CAN1	1214	1214	1	C	T	42	SNP	40	0.952	1		CCGTATTTTATTTGGTCTATCAAAGAACAAGTTGGCTCCTA	TCA	1
lge1_29	lge1Δ	CAN1	1537	1537	1	C	T	45	SNP	43	0.956	1		TGACGATCATTATCATTATTCAAGGTTTCACGGCTTTTGCA	TCA	1
lge1_32	lge1Δ	CAN1	939	940	1	C	DEL	5	Deletion	3	0.6	1		GCTGGTGAAGCTGCAAACCCCAGAAAATCCGTTCCAAGAGC	CCA	0
lge1_33	lge1Δ	CAN1	979	979	1	C	T	2	SNP	2	1	1		CCATCAAAAAAGTTGTTTTCCGTATCTTAACCTTCTACATT	CCG	0
lge1_35	lge1Δ	CAN1	1232	1232	1	C	G	74	SNP	74	1	1		ATCAAAGAACAAGTTGGCTCCTAAATTCCTGTCAAGGACCA	CCT	0
lge1_36	lge1Δ	CAN1	922	922	1	G	A	38	SNP	37	0.974	1		AACTAGTTGGTATCACTGCTGGTGAAGCTGCAAACCCCAGA	TGG	0
lge1_37	lge1Δ	CAN1	1214	1214	1	C	T	41	SNP	36	0.878	1		CCGTATTTTATTTGGTCTATCAAAGAACAAGTTGGCTCCTA	TCA	1
lge1_38	lge1Δ	CAN1	963	963	1	C	G	36	SNP	35	0.972	2	439	AAATCCGTTCCAAGAGCCATCAAAAAAGTTGTTTTCCGTAT	TCA	1
lge1_38	lge1Δ	CAN1	1403	1403	1	C	G	36	SNP	35	0.972	2		TTTTGCATGGTTATTTATCTCAATCTCGCACATCAGATTTA	TCA	1
lge1_43	lge1Δ	CAN1	585	585	1	G	A	42	SNP	39	0.929	1		GGCCAAGTCATTCAATTTTGGACGTACAAAGTTCCACTGGC	GGA	1
lge1_44	lge1Δ	CAN1	452	452	1	C	T	75	SNP	48	0.64	1		TACATTCACCCCTGTTACATCCTCTTTCACAGTGTTCTCAC	TCC	1
lge1_45	lge1Δ	CAN1	577	577	1	C	T	21	SNP	21	1	1		GTGTAGTTGGCCAAGTCATTCAATTTTGGACGTACAAAGTT	TCA	1
lge1_46	lge1Δ	CAN1	1244	1244	1	C	G	28	SNP	28	1	1		GTTGGCTCCTAAATTCCTGTCAAGGACCACCAAAGGTGGTG	TCA	1
lge1_47	lge1Δ	CAN1	1131	1131	1	C	T	3	SNP	2	0.667	1		ACAAAGGTTTTGCCACATATCTTCAACGCTGTTATCTTAAC	TCT	1
lge1_48	lge1Δ	CAN1	1214	1214	1	C	G	7	SNP	6	0.857	1		CCGTATTTTATTTGGTCTATCAAAGAACAAGTTGGCTCCTA	TCA	1
lge1_7	lge1Δ	CAN1	1214	1214	1	C	G	2	SNP	2	1	1		CCGTATTTTATTTGGTCTATCAAAGAACAAGTTGGCTCCTA	TCA	1
lge1_8	lge1Δ	CAN1	452	452	1	C	T	2	SNP	2	1	1		TACATTCACCCCTGTTACATCCTCTTTCACAGTGTTCTCAC	TCC	1
lge1_9	lge1Δ	CAN1	1175	1175	1	C	G	16	SNP	8	0.5	1		CATTATTTCTGCCGCAAATTCAAATATTTACGTTGGTTCCC	TCA	1
mec3_101	mec3Δ	CAN1	1214	1214	1	C	G	39	SNP	39	1	2	462	CCGTATTTTATTTGGTCTATCAAAGAACAAGTTGGCTCCTA	TCA	1
mec3_101	mec3Δ	CAN1	1677	1677	1	C	G	39	SNP	39	1	2		ATTTGGAAGATTGGAGATGTCGACATCGATTCCGATAGAAG	TCG	1
mec3_102	mec3Δ	CAN1	1244	1244	1	C	G	36	SNP	35	0.972	1		GTTGGCTCCTAAATTCCTGTCAAGGACCACCAAAGGTGGTG	TCA	1
mec3_103	mec3Δ	CAN1	442	442	1	C	T	58	SNP	30	0.517	1		GTGAAATGGCTACATTCACCCCTGTTACATCCTCTTTCACA	CCC	0
mec3_104	mec3Δ	CAN1	1214	1214	1	C	T	63	SNP	61	0.968	1		CCGTATTTTATTTGGTCTATCAAAGAACAAGTTGGCTCCTA	TCA	1
mec3_105	mec3Δ	CAN1	1391	1391	1	G	A	13	SNP	12	0.923	1		TGTTGCAGGCTTTTTTGCATGGTTATTTATCTCAATCTCGC	TGG	0
mec3_106	mec3Δ	CAN1	356	356	1	C	T	59	SNP	56	0.949	1		ACCTCTGACCAACGCCGGCCCAGTGGGCGCTCTTATATCAT	CCA	0
mec3_107	mec3Δ	CAN1	1214	1214	1	C	G	59	SNP	58	0.983	1		CCGTATTTTATTTGGTCTATCAAAGAACAAGTTGGCTCCTA	TCA	1
mec3_108	mec3Δ	CAN1	352	352	1	G	A	38	SNP	38	1	1		CCACACCTCTGACCAACGCCGGCCCAGTGGGCGCTCTTATA	CGG	0
mec3_109	mec3Δ	CAN1	1214	1214	1	C	G	64	SNP	59	0.922	1		CCGTATTTTATTTGGTCTATCAAAGAACAAGTTGGCTCCTA	TCA	1
mec3_110	mec3Δ	CAN1	113	113	1	C	G	44	SNP	44	1	1		AACACACCACAGACGTGGGTCAATACCATTAAAAGATGAGA	TCA	1
mec3_111	mec3Δ	CAN1	1214	1214	1	C	G	46	SNP	43	0.935	1		CCGTATTTTATTTGGTCTATCAAAGAACAAGTTGGCTCCTA	TCA	1
mec3_112	mec3Δ	CAN1	577	577	1	C	T	43	SNP	43	1	1		GTGTAGTTGGCCAAGTCATTCAATTTTGGACGTACAAAGTT	TCA	1
mec3_113	mec3Δ	CAN1	789	789	1	G	A	61	SNP	59	0.967	1		CCAGTTGGATTCCGTTATTGGAGAAACCCAGGTGCCTGGGG	GGA	1
mec3_114	mec3Δ	CAN1	1214	1214	1	C	T	55	SNP	55	1	1		CCGTATTTTATTTGGTCTATCAAAGAACAAGTTGGCTCCTA	TCA	1
mec3_115	mec3Δ	CAN1	1214	1214	1	C	G	28	SNP	27	0.964	1		CCGTATTTTATTTGGTCTATCAAAGAACAAGTTGGCTCCTA	TCA	1
mec3_116	mec3Δ	CAN1	455	455	1	C	T	65	SNP	65	1	1		ATTCACCCCTGTTACATCCTCTTTCACAGTGTTCTCACAAA	TCT	1
mec3_117	mec3Δ	CAN1	374	374	1	C	G	25	SNP	24	0.96	1		CCCAGTGGGCGCTCTTATATCATATTTATTTATGGGTTCTT	TCA	1
mec3_118	mec3Δ	CAN1	1623	1623	1	G	A	57	SNP	57	1	1		TTCCTGTTCTTAGCTGTTTGGATCTTATTTCAATGCATATT	GGA	1
mec3_119	mec3Δ	CAN1	1163	1163	1	C	T	53	SNP	53	1	1		TATCTTAACAACCATTATTTCTGCCGCAAATTCAAATATTT	TCT	1
mec3_120	mec3Δ	CAN1	1210	1210	1	C	T	79	SNP	77	0.975	2	3	GTTCCCGTATTTTATTTGGTCTATCAAAGAACAAGTTGGCT	TCT	1
mec3_120	mec3Δ	CAN1	1214	1214	1	C	G	79	SNP	78	0.987	2		CCGTATTTTATTTGGTCTATCAAAGAACAAGTTGGCTCCTA	TCA	1
mec3_121	mec3Δ	CAN1	696	697	1	C	DEL	40	Deletion	39	0.975	1		TTCGAGTTCTGGGTCGCTTCCATCAAAGTTTTAGCCATTAT	CCA	0
mec3_122	mec3Δ	CAN1	1403	1403	1	C	G	84	SNP	81	0.964	1		TTTTGCATGGTTATTTATCTCAATCTCGCACATCAGATTTA	TCA	1
mec3_123	mec3Δ	CAN1	463	463	1	G	T	42	SNP	41	0.976	3	4	CTGTTACATCCTCTTTCACAGTGTTCTCACAAAGATTCCTT	AGT	0
mec3_123	mec3Δ	CAN1	468	468	1	C	G	42	SNP	41	0.976	3	612	ACATCCTCTTTCACAGTGTTCTCACAAAGATTCCTTTCTCC	TCT	1
mec3_123	mec3Δ	CAN1	1081	1081	1	C	T	42	SNP	41	0.976	3		CTTCCTACGTTTCTACTTCTCCCTTTATTATTGCTATTGAG	TCC	1
mec3_124	mec3Δ	CAN1	1193	1193	1	C	T	20	SNP	18	0.9	1		TTCAAATATTTACGTTGGTTCCCGTATTTTATTTGGTCTAT	TCC	1
mec3_125	mec3Δ	CAN1	585	585	1	G	A	28	SNP	26	0.929	1		GGCCAAGTCATTCAATTTTGGACGTACAAAGTTCCACTGGC	GGA	1
mec3_126	mec3Δ	CAN1	656	656	1	C	T	44	SNP	42	0.955	1		CACAATAATGAACTTGTTCCCTGTCAAATATTACGGTGAAT	CCT	0
mec3_127	mec3Δ	CAN1	636	636	1	C	T	38	SNP	37	0.974	3	709	AGTATTTTTTGGGTAATTATCACAATAATGAACTTGTTCCC	TCA	1
mec3_127	mec3Δ	CAN1	1346	1347	1	T	DEL	38	Deletion	37	0.974	3	0	TACTGGTGGTGACAAAGTTTTCGAATGGCTATTAAATATCA	TTC	0
mec3_127	mec3Δ	CAN1	1347	1347	1	C	G	38	SNP	37	0.974	3		ACTGGTGGTGACAAAGTTTTCGAATGGCTATTAAATATCAC	TCG	1
mec3_128	mec3Δ	CAN1	1244	1244	1	C	G	46	SNP	45	0.978	1		GTTGGCTCCTAAATTCCTGTCAAGGACCACCAAAGGTGGTG	TCA	1
mec3_13	mec3Δ	CAN1	1214	1214	1	C	T	2	SNP	2	1	1		CCGTATTTTATTTGGTCTATCAAAGAACAAGTTGGCTCCTA	TCA	1
mec3_15	mec3Δ	CAN1	776	776	1	G	A	3	SNP	2	0.667	1		TGGGGTTACCGGCCCAGTTGGATTCCGTTATTGGAGAAACC	GGA	1
mec3_25	mec3Δ	CAN1	1195	1195	1	C	T	4	SNP	2	0.5	1		CAAATATTTACGTTGGTTCCCGTATTTTATTTGGTCTATCA	CCG	0
mec3_31	mec3Δ	CAN1	1403	1403	1	C	G	3	SNP	2	0.667	1		TTTTGCATGGTTATTTATCTCAATCTCGCACATCAGATTTA	TCA	1
mec3_33	mec3Δ	CAN1	577	577	1	C	T	2	SNP	2	1	1		GTGTAGTTGGCCAAGTCATTCAATTTTGGACGTACAAAGTT	TCA	1
mec3_43	mec3Δ	CAN1	530	530	1	G	C	4	SNP	2	0.5	1		TTACATGTATTGGTTTTCTTGGGCAATCACTTTTGCCCTGG	TGG	0
mec3_5	mec3Δ	CAN1	356	356	1	C	T	3	SNP	3	1	1		ACCTCTGACCAACGCCGGCCCAGTGGGCGCTCTTATATCAT	CCA	0
mec3_7	mec3Δ	CAN1	1193	1193	1	C	T	4	SNP	2	0.5	1		TTCAAATATTTACGTTGGTTCCCGTATTTTATTTGGTCTAT	TCC	1
mec3_8	mec3Δ	CAN1	1403	1403	1	C	G	7	SNP	5	0.714	1		TTTTGCATGGTTATTTATCTCAATCTCGCACATCAGATTTA	TCA	1
mlh1_01	mlh1Δ	CAN1	969	970	1	A	DEL	73	Deletion	71	0.973	1		GTTCCAAGAGCCATCAAAAAAGTTGTTTTCCGTATCTTAAC	AAG	0
mlh1_10	mlh1Δ	CAN1	625	626	1	T	DEL	5	Deletion	4	0.8	1		CGGCATGGATTAGTATTTTTTGGGTAATTATCACAATAATG	TTG	0
mlh1_101	mlh1Δ	CAN1	465	466	1	G	DEL	48	Deletion	46	0.958	1		GTTACATCCTCTTTCACAGTGTTCTCACAAAGATTCCTTTC	TGT	0
mlh1_102	mlh1Δ	CAN1	626	626	1	INS	T	25	Insertion	21	0.84	1		GCATGGATTAGTATTTTTTGGGTAATTATCACAATAATGA		0
mlh1_103	mlh1Δ	CAN1	626	626	1	INS	T	22	Insertion	20	0.909	1		GCATGGATTAGTATTTTTTGGGTAATTATCACAATAATGA		0
mlh1_104	mlh1Δ	CAN1	611	611	1	G	A	39	SNP	38	0.974	1		CAAAGTTCCACTGGCGGCATGGATTAGTATTTTTTGGGTAA	TGG	0
mlh1_105	mlh1Δ	CAN1	625	626	1	T	DEL	17	Deletion	16	0.941	1		CGGCATGGATTAGTATTTTTTGGGTAATTATCACAATAATG	TTG	0
mlh1_106	mlh1Δ	CAN1	892	892	1	C	T	38	SNP	38	1	1		TTAACGCTGCCTTCACATTTCAAGGTACTGAACTAGTTGGT	TCA	1
mlh1_107	mlh1Δ	CAN1	1214	1214	1	C	T	34	SNP	32	0.941	1		CCGTATTTTATTTGGTCTATCAAAGAACAAGTTGGCTCCTA	TCA	1
mlh1_108	mlh1Δ	CAN1	760	761	1	G	DEL	32	Deletion	32	1	1		GTATGGTTTGTGGTGCTGGGGTTACCGGCCCAGTTGGATTC	GGT	0
mlh1_109	mlh1Δ	CAN1	969	970	1	A	DEL	41	Deletion	41	1	1		GTTCCAAGAGCCATCAAAAAAGTTGTTTTCCGTATCTTAAC	AAG	0
mlh1_11	mlh1Δ	CAN1	1214	1214	1	C	T	6	SNP	2	0.333	1		CCGTATTTTATTTGGTCTATCAAAGAACAAGTTGGCTCCTA	TCA	1
mlh1_110	mlh1Δ	CAN1	612	612	1	G	A	79	SNP	78	0.987	1		AAAGTTCCACTGGCGGCATGGATTAGTATTTTTTGGGTAAT	GGA	1
mlh1_111	mlh1Δ	CAN1	465	466	1	G	DEL	67	Deletion	63	0.94	1		GTTACATCCTCTTTCACAGTGTTCTCACAAAGATTCCTTTC	TGT	0
mlh1_112	mlh1Δ	CAN1	809	810	1	G	DEL	45	Deletion	43	0.956	1		GAGAAACCCAGGTGCCTGGGGTCCAGGTATAATATCTAAGG	GGT	0
mlh1_113	mlh1Δ	CAN1	1178	1179	1	A	DEL	45	Deletion	43	0.956	1		TATTTCTGCCGCAAATTCAAATATTTACGTTGGTTCCCGTA	AAT	0
mlh1_114	mlh1Δ	CAN1	1214	1214	1	C	T	39	SNP	38	0.974	1		CCGTATTTTATTTGGTCTATCAAAGAACAAGTTGGCTCCTA	TCA	1
mlh1_115	mlh1Δ	CAN1	1387	1387	1	INS	T	59	Insertion	57	0.966	1		TGGTGTTGCAGGCTTTTTTGCATGGTTATTTATCTCAATC		0
mlh1_116	mlh1Δ	CAN1	301	301	1	A	C	68	SNP	66	0.971	1		GTATGATTGCCCTTGGTGGTACTATTGGTACAGGTCTTTTC	TAC	0
mlh1_117	mlh1Δ	CAN1	1537	1537	1	C	T	64	SNP	61	0.953	1		TGACGATCATTATCATTATTCAAGGTTTCACGGCTTTTGCA	TCA	1
mlh1_118	mlh1Δ	CAN1	626	626	1	INS	T	23	Insertion	21	0.913	1		GCATGGATTAGTATTTTTTGGGTAATTATCACAATAATGA		0
mlh1_119	mlh1Δ	CAN1	452	452	1	C	T	74	SNP	70	0.946	1		TACATTCACCCCTGTTACATCCTCTTTCACAGTGTTCTCAC	TCC	1
mlh1_12	mlh1Δ	CAN1	452	452	1	C	T	3	SNP	2	0.667	2	896	TACATTCACCCCTGTTACATCCTCTTTCACAGTGTTCTCAC	TCC	1
mlh1_12	mlh1Δ	CAN1	1349	1349	1	A	G	3	SNP	2	0.667	2		TGGTGGTGACAAAGTTTTCGAATGGCTATTAAATATCACTG	GAA	0
mlh1_120	mlh1Δ	CAN1	625	626	1	T	DEL	60	Deletion	56	0.933	1		CGGCATGGATTAGTATTTTTTGGGTAATTATCACAATAATG	TTG	0
mlh1_121	mlh1Δ	CAN1	1604	1605	1	T	DEL	43	Deletion	42	0.977	1		TGCCGCCTATATCTCTGTTTTCCTGTTCTTAGCTGTTTGGA	TTC	0
mlh1_122	mlh1Δ	CAN1	977	978	1	T	DEL	36	Deletion	32	0.889	1		AGCCATCAAAAAAGTTGTTTTCCGTATCTTAACCTTCTACA	TTC	0
mlh1_123	mlh1Δ	CAN1	452	452	1	C	T	47	SNP	41	0.872	1		TACATTCACCCCTGTTACATCCTCTTTCACAGTGTTCTCAC	TCC	1
mlh1_13	mlh1Δ	CAN1	625	626	1	T	DEL	8	Deletion	6	0.75	1		CGGCATGGATTAGTATTTTTTGGGTAATTATCACAATAATG	TTG	0
mlh1_15	mlh1Δ	CAN1	465	466	1	G	DEL	6	Deletion	5	0.833	1		GTTACATCCTCTTTCACAGTGTTCTCACAAAGATTCCTTTC	TGT	0
mlh1_18	mlh1Δ	CAN1	1214	1214	1	C	T	2	SNP	2	1	1		CCGTATTTTATTTGGTCTATCAAAGAACAAGTTGGCTCCTA	TCA	1
mlh1_19	mlh1Δ	CAN1	806	806	1	G	A	6	SNP	2	0.333	1		TTGGAGAAACCCAGGTGCCTGGGGTCCAGGTATAATATCTA	TGG	0
mlh1_2	mlh1Δ	CAN1	625	626	1	T	DEL	4	Deletion	3	0.75	1		CGGCATGGATTAGTATTTTTTGGGTAATTATCACAATAATG	TTG	0
mlh1_21	mlh1Δ	CAN1	626	626	1	INS	T	56	Insertion	38	0.679	1		GCATGGATTAGTATTTTTTGGGTAATTATCACAATAATGA		0
mlh1_22	mlh1Δ	CAN1	626	626	1	INS	T	22	Insertion	17	0.773	1		GCATGGATTAGTATTTTTTGGGTAATTATCACAATAATGA		0
mlh1_25	mlh1Δ	CAN1	543	544	1	T	DEL	127	Deletion	119	0.937	1		TTTTCTTGGGCAATCACTTTTGCCCTGGAACTTAGTGTAGT	TTG	0
mlh1_26	mlh1Δ	CAN1	1175	1175	1	C	G	6	SNP	2	0.333	1		CATTATTTCTGCCGCAAATTCAAATATTTACGTTGGTTCCC	TCA	1
mlh1_27	mlh1Δ	CAN1	739	740	1	T	DEL	9	Deletion	8	0.889	1		GGTTTCTAATATACTGTTTTTGTATGGTTTGTGGTGCTGGG	TTG	0
mlh1_3	mlh1Δ	CAN1	1214	1214	1	C	T	9	SNP	4	0.444	1		CCGTATTTTATTTGGTCTATCAAAGAACAAGTTGGCTCCTA	TCA	1
mlh1_30	mlh1Δ	CAN1	1386	1387	1	T	DEL	60	Deletion	50	0.833	1		ACTGGTGTTGCAGGCTTTTTTGCATGGTTATTTATCTCAAT	TTG	0
mlh1_31	mlh1Δ	CAN1	925	925	1	G	A	33	SNP	30	0.909	1		TAGTTGGTATCACTGCTGGTGAAGCTGCAAACCCCAGAAAA	TGA	1
mlh1_32	mlh1Δ	CAN1	625	626	1	T	DEL	41	Deletion	37	0.902	1		CGGCATGGATTAGTATTTTTTGGGTAATTATCACAATAATG	TTG	0
mlh1_33	mlh1Δ	CAN1	760	761	1	G	DEL	30	Deletion	24	0.8	1		GTATGGTTTGTGGTGCTGGGGTTACCGGCCCAGTTGGATTC	GGT	0
mlh1_35	mlh1Δ	CAN1	1537	1537	1	C	T	73	SNP	64	0.877	1		TGACGATCATTATCATTATTCAAGGTTTCACGGCTTTTGCA	TCA	1
mlh1_37	mlh1Δ	CAN1	257	257	1	G	T	96	SNP	96	1	1		ACAGAACGCTGAAGTGAAGAGAGAGCTTAAGCAAAGACATA	AGA	1
mlh1_38	mlh1Δ	CAN1	1193	1193	1	C	T	6	SNP	2	0.333	1		TTCAAATATTTACGTTGGTTCCCGTATTTTATTTGGTCTAT	TCC	1
mlh1_39	mlh1Δ	CAN1	1163	1163	1	C	T	65	SNP	60	0.923	1		TATCTTAACAACCATTATTTCTGCCGCAAATTCAAATATTT	TCT	1
mlh1_4	mlh1Δ	CAN1	1214	1214	1	C	T	6	SNP	4	0.667	1		CCGTATTTTATTTGGTCTATCAAAGAACAAGTTGGCTCCTA	TCA	1
mlh1_40	mlh1Δ	CAN1	1267	1267	1	C	T	9	SNP	3	0.333	1		GGACCACCAAAGGTGGTGTTCCATACATTGCAGTTTTCGTT	TCC	1
mlh1_41	mlh1Δ	CAN1	452	452	1	C	T	2	SNP	2	1	1		TACATTCACCCCTGTTACATCCTCTTTCACAGTGTTCTCAC	TCC	1
mlh1_42	mlh1Δ	CAN1	739	740	1	T	DEL	4	Deletion	3	0.75	1		GGTTTCTAATATACTGTTTTTGTATGGTTTGTGGTGCTGGG	TTG	0
mlh1_44	mlh1Δ	CAN1	1175	1175	1	C	T	4	SNP	2	0.5	1		CATTATTTCTGCCGCAAATTCAAATATTTACGTTGGTTCCC	TCA	1
mlh1_45	mlh1Δ	CAN1	1537	1537	1	C	T	52	SNP	51	0.981	1		TGACGATCATTATCATTATTCAAGGTTTCACGGCTTTTGCA	TCA	1
mlh1_46	mlh1Δ	CAN1	424	424	1	G	A	37	SNP	32	0.865	1		CTGTCACGCAGTCCTTGGGTGAAATGGCTACATTCACCCCT	TGA	1
mlh1_47	mlh1Δ	CAN1	969	970	1	A	DEL	5	Deletion	4	0.8	1		GTTCCAAGAGCCATCAAAAAAGTTGTTTTCCGTATCTTAAC	AAG	0
mlh1_48	mlh1Δ	CAN1	789	789	1	G	A	6	SNP	2	0.333	1		CCAGTTGGATTCCGTTATTGGAGAAACCCAGGTGCCTGGGG	GGA	1
mlh1_6	mlh1Δ	CAN1	679	679	1	G	A	6	SNP	3	0.5	1		TCAAATATTACGGTGAATTCGAGTTCTGGGTCGCTTCCATC	CGA	1
mcm16_01	mcm16Δ	CAN1	1004	1004	1	C	T	79	SNP	77	0.975	1		CTTAACCTTCTACATTGGCTCTCTATTATTCATTGGACTTT	TCT	1
mcm16_03	mcm16Δ	CAN1	858	858	1	G	A	94	SNP	93	0.989	1		GAAGGGAGGTTCTTAGGTTGGGTTTCCTCTTTGATTAACGC	GGG	0
mcm16_04	mcm16Δ	CAN1	356	356	1	C	T	28	SNP	27	0.964	1		ACCTCTGACCAACGCCGGCCCAGTGGGCGCTCTTATATCAT	CCA	0
mcm16_05	mcm16Δ	CAN1	1018	1018	1	G	A	70	SNP	68	0.971	1		TTGGCTCTCTATTATTCATTGGACTTTTAGTTCCATACAAT	TGG	0
mcm16_06	mcm16Δ	CAN1	1175	1175	1	C	T	70	SNP	67	0.957	1		CATTATTTCTGCCGCAAATTCAAATATTTACGTTGGTTCCC	TCA	1
mcm16_07	mcm16Δ	CAN1	356	356	1	C	T	74	SNP	72	0.973	1		ACCTCTGACCAACGCCGGCCCAGTGGGCGCTCTTATATCAT	CCA	0
mcm16_08	mcm16Δ	CAN1	679	679	1	G	A	97	SNP	83	0.856	1		TCAAATATTACGGTGAATTCGAGTTCTGGGTCGCTTCCATC	CGA	1
mcm16_09	mcm16Δ	CAN1	1214	1214	1	C	A	76	SNP	70	0.921	1		CCGTATTTTATTTGGTCTATCAAAGAACAAGTTGGCTCCTA	TCA	1
mcm16_10	mcm16Δ	CAN1	939	939	1	C	T	7	SNP	2	0.286	1		GCTGGTGAAGCTGCAAACCCCAGAAAATCCGTTCCAAGAGC	CCA	0
mcm16_11	mcm16Δ	CAN1	901	901	1	G	A	8	SNP	4	0.5	1		CCTTCACATTTCAAGGTACTGAACTAGTTGGTATCACTGCT	TGA	1
mcm16_12	mcm16Δ	CAN1	1214	1214	1	C	T	3	SNP	2	0.667	1		CCGTATTTTATTTGGTCTATCAAAGAACAAGTTGGCTCCTA	TCA	1
mcm16_14	mcm16Δ	CAN1	574	574	1	A	C	2	SNP	2	1	1		TTAGTGTAGTTGGCCAAGTCATTCAATTTTGGACGTACAAA	CAT	0
mcm16_15	mcm16Δ	CAN1	356	356	1	C	T	95	SNP	92	0.968	1		ACCTCTGACCAACGCCGGCCCAGTGGGCGCTCTTATATCAT	CCA	0
mcm16_16	mcm16Δ	CAN1	1633	1633	1	C	T	59	SNP	57	0.966	1		TAGCTGTTTGGATCTTATTTCAATGCATATTCAGATGCAGA	TCA	1
mcm16_17	mcm16Δ	CAN1	1409	1409	1	C	G	89	SNP	89	1	1		ATGGTTATTTATCTCAATCTCGCACATCAGATTTATGCAAG	TCG	1
mcm16_18	mcm16Δ	CAN1	470	470	1	C	G	28	SNP	25	0.893	1		ATCCTCTTTCACAGTGTTCTCACAAAGATTCCTTTCTCCAG	TCA	1
mcm16_19	mcm16Δ	CAN1	1175	1175	1	C	T	84	SNP	82	0.976	1		CATTATTTCTGCCGCAAATTCAAATATTTACGTTGGTTCCC	TCA	1
mcm16_2	mcm16Δ	CAN1	1403	1403	1	C	G	6	SNP	4	0.667	1		TTTTGCATGGTTATTTATCTCAATCTCGCACATCAGATTTA	TCA	1
mcm16_20	mcm16Δ	CAN1	1633	1633	1	C	T	104	SNP	96	0.923	1		TAGCTGTTTGGATCTTATTTCAATGCATATTCAGATGCAGA	TCA	1
mcm16_21	mcm16Δ	CAN1	424	424	1	G	A	72	SNP	70	0.972	1		CTGTCACGCAGTCCTTGGGTGAAATGGCTACATTCACCCCT	TGA	1
mcm16_23	mcm16Δ	CAN1	1214	1214	1	C	G	108	SNP	100	0.926	1		CCGTATTTTATTTGGTCTATCAAAGAACAAGTTGGCTCCTA	TCA	1
mcm16_25	mcm16Δ	CAN1	452	452	1	C	T	25	SNP	25	1	1		TACATTCACCCCTGTTACATCCTCTTTCACAGTGTTCTCAC	TCC	1
mcm16_27	mcm16Δ	CAN1	1623	1623	1	G	A	48	SNP	47	0.979	1		TTCCTGTTCTTAGCTGTTTGGATCTTATTTCAATGCATATT	GGA	1
mcm16_30	mcm16Δ	CAN1	1537	1537	1	C	T	92	SNP	89	0.967	1		TGACGATCATTATCATTATTCAAGGTTTCACGGCTTTTGCA	TCA	1
mcm16_31	mcm16Δ	CAN1	938	938	1	C	T	50	SNP	49	0.98	1		TGCTGGTGAAGCTGCAAACCCCAGAAAATCCGTTCCAAGAG	CCC	0
mcm16_32	mcm16Δ	CAN1	679	679	1	G	A	71	SNP	69	0.972	1		TCAAATATTACGGTGAATTCGAGTTCTGGGTCGCTTCCATC	CGA	1
mcm16_34	mcm16Δ	CAN1	1175	1175	1	C	T	92	SNP	89	0.967	1		CATTATTTCTGCCGCAAATTCAAATATTTACGTTGGTTCCC	TCA	1
mcm16_35	mcm16Δ	CAN1	1409	1409	1	C	G	50	SNP	45	0.9	1		ATGGTTATTTATCTCAATCTCGCACATCAGATTTATGCAAG	TCG	1
mcm16_37	mcm16Δ	CAN1	1214	1214	1	C	T	6	SNP	4	0.667	1		CCGTATTTTATTTGGTCTATCAAAGAACAAGTTGGCTCCTA	TCA	1
mcm16_38	mcm16Δ	CAN1	113	113	1	C	G	5	SNP	3	0.6	1		AACACACCACAGACGTGGGTCAATACCATTAAAAGATGAGA	TCA	1
mcm16_40	mcm16Δ	CAN1	1214	1214	1	C	G	3	SNP	2	0.667	1		CCGTATTTTATTTGGTCTATCAAAGAACAAGTTGGCTCCTA	TCA	1
mcm16_41	mcm16Δ	CAN1	374	374	1	C	G	73	SNP	72	0.986	1		CCCAGTGGGCGCTCTTATATCATATTTATTTATGGGTTCTT	TCA	1
mcm16_43	mcm16Δ	CAN1	577	577	1	C	T	83	SNP	81	0.976	1		GTGTAGTTGGCCAAGTCATTCAATTTTGGACGTACAAAGTT	TCA	1
mcm16_44	mcm16Δ	CAN1	527	527	1	C	T	97	SNP	82	0.845	1		TGGTTACATGTATTGGTTTTCTTGGGCAATCACTTTTGCCC	TCT	1
mcm16_45	mcm16Δ	CAN1	568	568	1	C	T	8	SNP	7	0.875	1		TGGAACTTAGTGTAGTTGGCCAAGTCATTCAATTTTGGACG	CCA	0
mcm16_48	mcm16Δ	CAN1	612	612	1	G	A	2	SNP	2	1	1		AAAGTTCCACTGGCGGCATGGATTAGTATTTTTTGGGTAAT	GGA	1
mph1_10	mph1Δ	CAN1	374	374	1	C	G	8	SNP	7	0.875	1		CCCAGTGGGCGCTCTTATATCATATTTATTTATGGGTTCTT	TCA	1
mph1_11	mph1Δ	CAN1	1195	1195	1	C	T	6	SNP	3	0.5	1		CAAATATTTACGTTGGTTCCCGTATTTTATTTGGTCTATCA	CCG	0
mph1_12	mph1Δ	CAN1	1244	1244	1	C	G	8	SNP	6	0.75	1		GTTGGCTCCTAAATTCCTGTCAAGGACCACCAAAGGTGGTG	TCA	1
mph1_13	mph1Δ	CAN1	1633	1633	1	C	T	14	SNP	9	0.643	1		TAGCTGTTTGGATCTTATTTCAATGCATATTCAGATGCAGA	TCA	1
mph1_24	mph1Δ	CAN1	374	374	1	C	G	15	SNP	12	0.8	1		CCCAGTGGGCGCTCTTATATCATATTTATTTATGGGTTCTT	TCA	1
mph1_25	mph1Δ	CAN1	864	865	1	C	DEL	5	Deletion	5	1	1		AGGTTCTTAGGTTGGGTTTCCTCTTTGATTAACGCTGCCTT	CCT	0
mph1_31	mph1Δ	CAN1	1175	1175	1	C	G	6	SNP	4	0.667	1		CATTATTTCTGCCGCAAATTCAAATATTTACGTTGGTTCCC	TCA	1
mph1_42	mph1Δ	CAN1	374	374	1	C	A	11	SNP	9	0.818	1		CCCAGTGGGCGCTCTTATATCATATTTATTTATGGGTTCTT	TCA	1
mph1_48	mph1Δ	CAN1	434	434	1	C	A	7	SNP	5	0.714	1		GTCCTTGGGTGAAATGGCTACATTCACCCCTGTTACATCCT	ACA	0
mph1_9	mph1Δ	CAN1	892	893	1	C	DEL	7	Deletion	5	0.714	1		TTAACGCTGCCTTCACATTTCAAGGTACTGAACTAGTTGGT	TCA	1
mph1_A3B-01	mph1Δ	CAN1	91	91	1	C	T	1	SNP	1	1	1		TTCACGACGTTGAAGCTTCACAAACACACCACAGACGTGGG	ACA	0
mph1_A3B-11	mph1Δ	CAN1	452	452	1	C	T	1	SNP	1	1	1		TACATTCACCCCTGTTACATCCTCTTTCACAGTGTTCTCAC	TCC	1
mph1_A3B-12	mph1Δ	CAN1	1214	1214	1	C	T	2	SNP	2	1	1		CCGTATTTTATTTGGTCTATCAAAGAACAAGTTGGCTCCTA	TCA	1
mph1_A3B-13	mph1Δ	CAN1	1079	1080	1	C	DEL	1	Deletion	1	1	1		TACTTCCTACGTTTCTACTTCTCCCTTTATTATTGCTATTG	TCT	1
mph1_A3B-14	mph1Δ	CAN1	574	574	1	A	C	2	SNP	2	1	2	2	TTAGTGTAGTTGGCCAAGTCATTCAATTTTGGACGTACAAA	CAT	0
mph1_A3B-14	mph1Δ	CAN1	577	577	1	C	T	2	SNP	2	1	2		GTGTAGTTGGCCAAGTCATTCAATTTTGGACGTACAAAGTT	TCA	1
mph1_A3B-15	mph1Δ	CAN1	11	11	1	C	G	1	SNP	1	1	1		ATGACAAATTCAAAAGAAGACGCCGACATAG	TCA	1
mph1_A3B-16	mph1Δ	CAN1	1537	1537	1	C	T	1	SNP	1	1	1		TGACGATCATTATCATTATTCAAGGTTTCACGGCTTTTGCA	TCA	1
mph1_A3B-17	mph1Δ	CAN1	452	452	1	C	T	1	SNP	1	1	1		TACATTCACCCCTGTTACATCCTCTTTCACAGTGTTCTCAC	TCC	1
mph1_A3B-18	mph1Δ	CAN1	11	11	1	C	G	1	SNP	1	1	1		ATGACAAATTCAAAAGAAGACGCCGACATAG	TCA	1
mph1_A3B-19	mph1Δ	CAN1	374	374	1	C	A	1	SNP	1	1	1		CCCAGTGGGCGCTCTTATATCATATTTATTTATGGGTTCTT	TCA	1
mph1_A3B-02	mph1Δ	CAN1	11	11	1	C	G	1	SNP	1	1	1		ATGACAAATTCAAAAGAAGACGCCGACATAG	TCA	1
mph1_A3B-20	mph1Δ	CAN1	1214	1214	1	C	T	1	SNP	1	1	1		CCGTATTTTATTTGGTCTATCAAAGAACAAGTTGGCTCCTA	TCA	1
mph1_A3B-23	mph1Δ	CAN1	11	11	1	C	G	1	SNP	1	1	1		ATGACAAATTCAAAAGAAGACGCCGACATAG	TCA	1
mph1_A3B-24	mph1Δ	CAN1	1409	1409	1	C	G	1	SNP	1	1	1		ATGGTTATTTATCTCAATCTCGCACATCAGATTTATGCAAG	TCG	1
mph1_A3B-25	mph1Δ	CAN1	1163	1163	1	C	T	1	SNP	1	1	1		TATCTTAACAACCATTATTTCTGCCGCAAATTCAAATATTT	TCT	1
mph1_A3B-26	mph1Δ	CAN1	1175	1175	1	C	G	1	SNP	1	1	1		CATTATTTCTGCCGCAAATTCAAATATTTACGTTGGTTCCC	TCA	1
mph1_A3B-27	mph1Δ	CAN1	527	527	1	C	T	1	SNP	1	1	1		TGGTTACATGTATTGGTTTTCTTGGGCAATCACTTTTGCCC	TCT	1
mph1_A3B-28	mph1Δ	CAN1	1163	1163	1	C	A	1	SNP	1	1	1		TATCTTAACAACCATTATTTCTGCCGCAAATTCAAATATTT	TCT	1
mph1_A3B-29	mph1Δ	CAN1	1175	1175	1	C	G	1	SNP	1	1	1		CATTATTTCTGCCGCAAATTCAAATATTTACGTTGGTTCCC	TCA	1
mph1_A3B-30	mph1Δ	CAN1	1633	1633	1	INS	T	1	Insertion	1	1	2	0	AGCTGTTTGGATCTTATTTCAATGCATATTCAGATGCAGA		0
mph1_A3B-30	mph1Δ	CAN1	1633	1633	1	C	G	1	SNP	1	1	2		TAGCTGTTTGGATCTTATTTCAATGCATATTCAGATGCAGA	TCA	1
mph1_A3B-31	mph1Δ	CAN1	374	374	1	C	G	1	SNP	1	1	1		CCCAGTGGGCGCTCTTATATCATATTTATTTATGGGTTCTT	TCA	1
mph1_A3B-04	mph1Δ	CAN1	11	11	1	C	G	1	SNP	1	1	1		ATGACAAATTCAAAAGAAGACGCCGACATAG	TCA	1
mph1_A3B-32	mph1Δ	CAN1	470	470	1	C	G	1	SNP	1	1	1		ATCCTCTTTCACAGTGTTCTCACAAAGATTCCTTTCTCCAG	TCA	1
mph1_A3B-33	mph1Δ	CAN1	1195	1195	1	C	T	1	SNP	1	1	1		CAAATATTTACGTTGGTTCCCGTATTTTATTTGGTCTATCA	CCG	0
mph1_A3B-34	mph1Δ	CAN1	89	89	1	C	A	1	SNP	1	1	1		CTTTCACGACGTTGAAGCTTCACAAACACACCACAGACGTG	TCA	1
mph1_A3B-35	mph1Δ	CAN1	11	11	1	C	G	1	SNP	1	1	1		ATGACAAATTCAAAAGAAGACGCCGACATAG	TCA	1
mph1_A3B-36	mph1Δ	CAN1	11	11	1	C	G	1	SNP	1	1	1		ATGACAAATTCAAAAGAAGACGCCGACATAG	TCA	1
mph1_A3B-37	mph1Δ	CAN1	1244	1244	1	C	G	2	SNP	2	1	1		GTTGGCTCCTAAATTCCTGTCAAGGACCACCAAAGGTGGTG	TCA	1
mph1_A3B-38	mph1Δ	CAN1	1244	1244	1	C	G	2	SNP	2	1	1		GTTGGCTCCTAAATTCCTGTCAAGGACCACCAAAGGTGGTG	TCA	1
mph1_A3B-39	mph1Δ	CAN1	1244	1244	1	C	G	2	SNP	2	1	1		GTTGGCTCCTAAATTCCTGTCAAGGACCACCAAAGGTGGTG	TCA	1
mph1_A3B-40	mph1Δ	CAN1	113	113	1	C	G	1	SNP	1	1	1		AACACACCACAGACGTGGGTCAATACCATTAAAAGATGAGA	TCA	1
mph1_A3B-41	mph1Δ	CAN1	679	679	1	G	A	1	SNP	1	1	1		TCAAATATTACGGTGAATTCGAGTTCTGGGTCGCTTCCATC	CGA	1
mph1_A3B-05	mph1Δ	CAN1	470	470	1	C	G	1	SNP	1	1	1		ATCCTCTTTCACAGTGTTCTCACAAAGATTCCTTTCTCCAG	TCA	1
mph1_A3B-42	mph1Δ	CAN1	1403	1403	1	C	G	1	SNP	1	1	1		TTTTGCATGGTTATTTATCTCAATCTCGCACATCAGATTTA	TCA	1
mph1_A3B-43	mph1Δ	CAN1	1633	1633	1	C	T	1	SNP	1	1	1		TAGCTGTTTGGATCTTATTTCAATGCATATTCAGATGCAGA	TCA	1
mph1_A3B-44	mph1Δ	CAN1	1214	1214	1	C	G	2	SNP	2	1	1		CCGTATTTTATTTGGTCTATCAAAGAACAAGTTGGCTCCTA	TCA	1
mph1_A3B-45	mph1Δ	CAN1	1244	1244	1	C	G	2	SNP	2	1	1		GTTGGCTCCTAAATTCCTGTCAAGGACCACCAAAGGTGGTG	TCA	1
mph1_A3B-46	mph1Δ	CAN1	521	521	1	G	T	1	SNP	1	1	3	5	GGCCAATGGTTACATGTATTGGTTTTCTTGGGCAATCACTT	TGG	0
mph1_A3B-46	mph1Δ	CAN1	527	527	1	INS	T	1	Insertion	1	1	3	0	GGTTACATGTATTGGTTTTCTTGGGCAATCACTTTTGCCC		0
mph1_A3B-46	mph1Δ	CAN1	527	527	1	C	G	1	SNP	1	1	3		TGGTTACATGTATTGGTTTTCTTGGGCAATCACTTTTGCCC	TCT	1
mph1_A3B-47	mph1Δ	CAN1	1403	1403	1	C	G	1	SNP	1	1	1		TTTTGCATGGTTATTTATCTCAATCTCGCACATCAGATTTA	TCA	1
mph1_A3B-48	mph1Δ	CAN1	584	584	1	G	A	1	SNP	1	1	2	881	TGGCCAAGTCATTCAATTTTGGACGTACAAAGTTCCACTGG	TGG	0
mph1_A3B-48	mph1Δ	CAN1	1466	1466	1	C	T	1	SNP	1	1	2		CATCTCTCGTGACGAGTTACCATTTAAAGCTAAATTAATGC	CCA	0
mph1_A3B-49	mph1Δ	CAN1	1175	1175	1	C	T	1	SNP	1	1	1		CATTATTTCTGCCGCAAATTCAAATATTTACGTTGGTTCCC	TCA	1
mph1_A3B-06	mph1Δ	CAN1	863	863	1	INS	T	1	Insertion	1	1	2	0	AGGTTCTTAGGTTGGGTTTCCTCTTTGATTAACGCTGCCT		0
mph1_A3B-06	mph1Δ	CAN1	863	863	1	C	A	1	SNP	1	1	2		GAGGTTCTTAGGTTGGGTTTCCTCTTTGATTAACGCTGCCT	TCC	1
mph1_A3B-50	mph1Δ	CAN1	452	452	1	C	T	1	SNP	1	1	1		TACATTCACCCCTGTTACATCCTCTTTCACAGTGTTCTCAC	TCC	1
mph1_A3B-51	mph1Δ	CAN1	1175	1175	1	C	G	1	SNP	1	1	1		CATTATTTCTGCCGCAAATTCAAATATTTACGTTGGTTCCC	TCA	1
mph1_A3B-52	mph1Δ	CAN1	442	442	1	C	G	1	SNP	1	1	1		GTGAAATGGCTACATTCACCCCTGTTACATCCTCTTTCACA	CCC	0
mph1_A3B-53	mph1Δ	CAN1	485	486	1	C	DEL	1	Deletion	1	1	1		GTTCTCACAAAGATTCCTTTCTCCAGCATTTGGTGCGGCCA	TCT	1
mph1_A3B-54	mph1Δ	CAN1	1214	1214	1	C	G	2	SNP	2	1	1		CCGTATTTTATTTGGTCTATCAAAGAACAAGTTGGCTCCTA	TCA	1
mph1_A3B-55	mph1Δ	CAN1	1633	1634	1	C	DEL	1	Deletion	1	1	1		TAGCTGTTTGGATCTTATTTCAATGCATATTCAGATGCAGA	TCA	1
mph1_A3B-56	mph1Δ	CAN1	416	416	1	C	G	1	SNP	1	1	2	797	GGCATATTCTGTCACGCAGTCCTTGGGTGAAATGGCTACAT	TCC	1
mph1_A3B-56	mph1Δ	CAN1	1214	1214	1	C	G	2	SNP	2	1	2		CCGTATTTTATTTGGTCTATCAAAGAACAAGTTGGCTCCTA	TCA	1
mph1_A3B-57	mph1Δ	CAN1	892	892	1	C	T	1	SNP	1	1	1		TTAACGCTGCCTTCACATTTCAAGGTACTGAACTAGTTGGT	TCA	1
mph1_A3B-58	mph1Δ	CAN1	1214	1214	1	C	G	1	SNP	1	1	1		CCGTATTTTATTTGGTCTATCAAAGAACAAGTTGGCTCCTA	TCA	1
mph1_A3B-07	mph1Δ	CAN1	1244	1244	1	C	G	2	SNP	2	1	1		GTTGGCTCCTAAATTCCTGTCAAGGACCACCAAAGGTGGTG	TCA	1
mph1_A3B-59	mph1Δ	CAN1	1163	1164	1	C	DEL	1	Deletion	1	1	1		TATCTTAACAACCATTATTTCTGCCGCAAATTCAAATATTT	TCT	1
mph1_A3B-60	mph1Δ	CAN1	1175	1175	1	C	G	1	SNP	1	1	2	550	CATTATTTCTGCCGCAAATTCAAATATTTACGTTGGTTCCC	TCA	1
mph1_A3B-60	mph1Δ	CAN1	1726	1726	1	C	T	1	SNP	1	1	2		AGGCAATTGTATGGGAAGATCATGAACCAAAGACTTTTTGG	TCA	1
mph1_A3B-61	mph1Δ	CAN1	1214	1214	1	C	G	1	SNP	1	1	1		CCGTATTTTATTTGGTCTATCAAAGAACAAGTTGGCTCCTA	TCA	1
mph1_A3B-62	mph1Δ	CAN1	993	993	1	C	G	1	SNP	1	1	1		GTTTTCCGTATCTTAACCTTCTACATTGGCTCTCTATTATT	TCT	1
mph1_A3B-63	mph1Δ	CAN1	1163	1163	1	C	T	1	SNP	1	1	1		TATCTTAACAACCATTATTTCTGCCGCAAATTCAAATATTT	TCT	1
mph1_A3B-64	mph1Δ	CAN1	1403	1403	1	C	G	1	SNP	1	1	1		TTTTGCATGGTTATTTATCTCAATCTCGCACATCAGATTTA	TCA	1
mph1_A3B-72	mph1Δ	CAN1	11	11	1	C	G	1	SNP	1	1	1		ATGACAAATTCAAAAGAAGACGCCGACATAG	TCA	1
mph1_A3B-08	mph1Δ	CAN1	374	374	1	C	G	1	SNP	1	1	1		CCCAGTGGGCGCTCTTATATCATATTTATTTATGGGTTCTT	TCA	1
mph1_A3B-09	mph1Δ	CAN1	1214	1214	1	C	G	2	SNP	2	1	1		CCGTATTTTATTTGGTCTATCAAAGAACAAGTTGGCTCCTA	TCA	1
mph1_A3B-10	mph1Δ	CAN1	1403	1403	1	C	G	1	SNP	1	1	1		TTTTGCATGGTTATTTATCTCAATCTCGCACATCAGATTTA	TCA	1
mrc1_01	mrc1Δ	CAN1	1214	1214	1	C	G	23	SNP	22	0.957	1		CCGTATTTTATTTGGTCTATCAAAGAACAAGTTGGCTCCTA	TCA	1
mrc1_02	mrc1Δ	CAN1	1214	1214	1	C	G	32	SNP	28	0.875	1		CCGTATTTTATTTGGTCTATCAAAGAACAAGTTGGCTCCTA	TCA	1
mrc1_03	mrc1Δ	CAN1	1018	1018	1	G	A	38	SNP	23	0.605	1		TTGGCTCTCTATTATTCATTGGACTTTTAGTTCCATACAAT	TGG	0
mrc1_04	mrc1Δ	CAN1	113	113	1	C	G	42	SNP	41	0.976	1		AACACACCACAGACGTGGGTCAATACCATTAAAAGATGAGA	TCA	1
mrc1_05	mrc1Δ	CAN1	1175	1175	1	C	G	36	SNP	30	0.833	1		CATTATTTCTGCCGCAAATTCAAATATTTACGTTGGTTCCC	TCA	1
mrc1_06	mrc1Δ	CAN1	374	374	1	C	G	57	SNP	29	0.509	1		CCCAGTGGGCGCTCTTATATCATATTTATTTATGGGTTCTT	TCA	1
mrc1_07	mrc1Δ	CAN1	314	314	1	G	A	45	SNP	45	1	1		TGGTGGTACTATTGGTACAGGTCTTTTCATTGGTTTATCCA	GGT	0
mrc1_08	mrc1Δ	CAN1	1244	1244	1	C	G	45	SNP	44	0.978	1		GTTGGCTCCTAAATTCCTGTCAAGGACCACCAAAGGTGGTG	TCA	1
mrc1_09	mrc1Δ	CAN1	1214	1214	1	C	G	54	SNP	51	0.944	1		CCGTATTTTATTTGGTCTATCAAAGAACAAGTTGGCTCCTA	TCA	1
mrc1_10	mrc1Δ	CAN1	570	570	1	A	G	40	SNP	39	0.975	3	2	GAACTTAGTGTAGTTGGCCAAGTCATTCAATTTTGGACGTA	AAG	0
mrc1_10	mrc1Δ	CAN1	573	574	1	C	DEL	40	Deletion	39	0.975	3	956	CTTAGTGTAGTTGGCCAAGTCATTCAATTTTGGACGTACAA	TCA	1
mrc1_10	mrc1Δ	CAN1	1530	1530	1	C	G	40	SNP	39	0.975	3		ACATTTATGACGATCATTATCATTATTCAAGGTTTCACGGC	TCA	1
mrc1_11	mrc1Δ	CAN1	1537	1537	1	C	T	33	SNP	28	0.848	1		TGACGATCATTATCATTATTCAAGGTTTCACGGCTTTTGCA	TCA	1
mrc1_12	mrc1Δ	CAN1	577	577	1	C	T	40	SNP	36	0.9	1		GTGTAGTTGGCCAAGTCATTCAATTTTGGACGTACAAAGTT	TCA	1
mrc1_13	mrc1Δ	CAN1	11	11	1	C	G	46	SNP	45	0.978	1		ATGACAAATTCAAAAGAAGACGCCGACATAG	TCA	1
mrc1_14	mrc1Δ	CAN1	1175	1175	1	C	G	29	SNP	29	1	1		CATTATTTCTGCCGCAAATTCAAATATTTACGTTGGTTCCC	TCA	1
mrc1_15	mrc1Δ	CAN1	1244	1244	1	C	G	19	SNP	17	0.895	1		GTTGGCTCCTAAATTCCTGTCAAGGACCACCAAAGGTGGTG	TCA	1
mrc1_16	mrc1Δ	CAN1	455	455	1	C	T	22	SNP	22	1	1		ATTCACCCCTGTTACATCCTCTTTCACAGTGTTCTCACAAA	TCT	1
mrc1_17	mrc1Δ	CAN1	670	670	1	G	A	20	SNP	16	0.8	1		TGTTCCCTGTCAAATATTACGGTGAATTCGAGTTCTGGGTC	CGG	0
mrc1_18	mrc1Δ	CAN1	1214	1214	1	C	G	32	SNP	23	0.719	2	16	CCGTATTTTATTTGGTCTATCAAAGAACAAGTTGGCTCCTA	TCA	1
mrc1_18	mrc1Δ	CAN1	1231	1231	1	C	G	32	SNP	31	0.969	2		TATCAAAGAACAAGTTGGCTCCTAAATTCCTGTCAAGGACC	TCC	1
mrc1_19	mrc1Δ	CAN1	424	424	1	G	A	34	SNP	32	0.941	1		CTGTCACGCAGTCCTTGGGTGAAATGGCTACATTCACCCCT	TGA	1
mrc1_20	mrc1Δ	CAN1	1175	1175	1	C	G	32	SNP	31	0.969	1		CATTATTTCTGCCGCAAATTCAAATATTTACGTTGGTTCCC	TCA	1
mrc1_21	mrc1Δ	CAN1	1175	1175	1	C	G	58	SNP	54	0.931	1		CATTATTTCTGCCGCAAATTCAAATATTTACGTTGGTTCCC	TCA	1
mrc1_22	mrc1Δ	CAN1	1403	1403	1	C	G	35	SNP	35	1	1		TTTTGCATGGTTATTTATCTCAATCTCGCACATCAGATTTA	TCA	1
mrc1_23	mrc1Δ	CAN1	1403	1403	1	C	G	34	SNP	29	0.853	1		TTTTGCATGGTTATTTATCTCAATCTCGCACATCAGATTTA	TCA	1
mrc1_24	mrc1Δ	CAN1	979	979	1	C	T	49	SNP	45	0.918	1		CCATCAAAAAAGTTGTTTTCCGTATCTTAACCTTCTACATT	CCG	0
mrc1_25	mrc1Δ	CAN1	452	452	1	C	T	26	SNP	11	0.423	1		TACATTCACCCCTGTTACATCCTCTTTCACAGTGTTCTCAC	TCC	1
mrc1_26	mrc1Δ	CAN1	901	901	1	G	A	31	SNP	16	0.516	1		CCTTCACATTTCAAGGTACTGAACTAGTTGGTATCACTGCT	TGA	1
mrc1_27	mrc1Δ	CAN1	1403	1403	1	C	G	38	SNP	37	0.974	1		TTTTGCATGGTTATTTATCTCAATCTCGCACATCAGATTTA	TCA	1
mrc1_28	mrc1Δ	CAN1	1409	1409	1	C	G	50	SNP	48	0.96	1		ATGGTTATTTATCTCAATCTCGCACATCAGATTTATGCAAG	TCG	1
mrc1_29	mrc1Δ	CAN1	1244	1244	1	C	A	23	SNP	18	0.783	2	366	GTTGGCTCCTAAATTCCTGTCAAGGACCACCAAAGGTGGTG	TCA	1
mrc1_29	mrc1Δ	CAN1	1611	1611	1	C	T	23	SNP	18	0.783	2		TATATCTCTGTTTTCCTGTTCTTAGCTGTTTGGATCTTATT	TCT	1
mrc1_30	mrc1Δ	CAN1	374	374	1	C	G	26	SNP	25	0.962	1		CCCAGTGGGCGCTCTTATATCATATTTATTTATGGGTTCTT	TCA	1
mrc1_31	mrc1Δ	CAN1	374	374	1	C	G	23	SNP	16	0.696	1		CCCAGTGGGCGCTCTTATATCATATTTATTTATGGGTTCTT	TCA	1
mrc1_32	mrc1Δ	CAN1	1623	1623	1	G	A	7	SNP	5	0.714	1		TTCCTGTTCTTAGCTGTTTGGATCTTATTTCAATGCATATT	GGA	1
mrc1_33	mrc1Δ	CAN1	1214	1214	1	C	G	19	SNP	17	0.895	1		CCGTATTTTATTTGGTCTATCAAAGAACAAGTTGGCTCCTA	TCA	1
mrc1_34	mrc1Δ	CAN1	1129	1131	2	AT	DEL	31	Deletion	29	0.935	1		GTACAAAGGTTTTGCCACATATCTTCAACGCTGTTATCTTAA		0
mrc1_35	mrc1Δ	CAN1	11	11	1	C	G	32	SNP	31	0.969	1		ATGACAAATTCAAAAGAAGACGCCGACATAG	TCA	1
mrc1_36	mrc1Δ	CAN1	374	374	1	C	G	28	SNP	27	0.964	1		CCCAGTGGGCGCTCTTATATCATATTTATTTATGGGTTCTT	TCA	1
mrc1_37	mrc1Δ	CAN1	374	374	1	C	G	26	SNP	13	0.5	1		CCCAGTGGGCGCTCTTATATCATATTTATTTATGGGTTCTT	TCA	1
oca6_49	oca6Δ	CAN1	1214	1214	1	C	G	11	SNP	9	0.818	1		CCGTATTTTATTTGGTCTATCAAAGAACAAGTTGGCTCCTA	TCA	1
oca6_50	oca6Δ	CAN1	1214	1214	1	C	G	3	SNP	3	1	1		CCGTATTTTATTTGGTCTATCAAAGAACAAGTTGGCTCCTA	TCA	1
oca6_51	oca6Δ	CAN1	1163	1163	1	C	T	10	SNP	8	0.8	1		TATCTTAACAACCATTATTTCTGCCGCAAATTCAAATATTT	TCT	1
oca6_52	oca6Δ	CAN1	1662	1662	1	G	A	7	SNP	6	0.857	1		TTCAGATGCAGATTTATTTGGAAGATTGGAGATGTCGACAT	GGA	1
oca6_53	oca6Δ	CAN1	11	11	1	C	G	7	SNP	6	0.857	1		ATGACAAATTCAAAAGAAGACGCCGACATAG	TCA	1
oca6_54	oca6Δ	CAN1	1163	1164	1	C	DEL	6	Deletion	6	1	1		TATCTTAACAACCATTATTTCTGCCGCAAATTCAAATATTT	TCT	1
oca6_56	oca6Δ	CAN1	612	612	1	G	A	5	SNP	3	0.6	1		AAAGTTCCACTGGCGGCATGGATTAGTATTTTTTGGGTAAT	GGA	1
oca6_57	oca6Δ	CAN1	1214	1214	1	C	G	3	SNP	3	1	1		CCGTATTTTATTTGGTCTATCAAAGAACAAGTTGGCTCCTA	TCA	1
oca6_59	oca6Δ	CAN1	993	993	1	C	G	7	SNP	7	1	1		GTTTTCCGTATCTTAACCTTCTACATTGGCTCTCTATTATT	TCT	1
oca6_60	oca6Δ	CAN1	424	424	1	G	A	10	SNP	7	0.7	1		CTGTCACGCAGTCCTTGGGTGAAATGGCTACATTCACCCCT	TGA	1
oca6_61	oca6Δ	CAN1	113	113	1	C	G	6	SNP	5	0.833	1		AACACACCACAGACGTGGGTCAATACCATTAAAAGATGAGA	TCA	1
oca6_62	oca6Δ	CAN1	1175	1175	1	C	T	9	SNP	7	0.778	1		CATTATTTCTGCCGCAAATTCAAATATTTACGTTGGTTCCC	TCA	1
oca6_63	oca6Δ	CAN1	295	295	1	G	C	8	SNP	6	0.75	1		ATATTGGTATGATTGCCCTTGGTGGTACTATTGGTACAGGT	TGG	0
oca6_64	oca6Δ	CAN1	1175	1175	1	C	G	3	SNP	2	0.667	2	189	CATTATTTCTGCCGCAAATTCAAATATTTACGTTGGTTCCC	TCA	1
oca6_64	oca6Δ	CAN1	1365	1365	1	C	G	3	SNP	2	0.667	2		TTCGAATGGCTATTAAATATCACTGGTGTTGCAGGCTTTTT	TCA	1
oca6_65	oca6Δ	CAN1	577	577	1	C	T	7	SNP	7	1	1		GTGTAGTTGGCCAAGTCATTCAATTTTGGACGTACAAAGTT	TCA	1
oca6_66	oca6Δ	CAN1	1214	1214	1	C	G	8	SNP	8	1	1		CCGTATTTTATTTGGTCTATCAAAGAACAAGTTGGCTCCTA	TCA	1
oca6_67	oca6Δ	CAN1	1403	1403	1	C	G	3	SNP	3	1	1		TTTTGCATGGTTATTTATCTCAATCTCGCACATCAGATTTA	TCA	1
oca6_68	oca6Δ	CAN1	1214	1214	1	C	G	2	SNP	2	1	1		CCGTATTTTATTTGGTCTATCAAAGAACAAGTTGGCTCCTA	TCA	1
oca6_69	oca6Δ	CAN1	452	452	1	C	T	8	SNP	6	0.75	1		TACATTCACCCCTGTTACATCCTCTTTCACAGTGTTCTCAC	TCC	1
oca6_71	oca6Δ	CAN1	1175	1175	1	C	G	3	SNP	3	1	1		CATTATTTCTGCCGCAAATTCAAATATTTACGTTGGTTCCC	TCA	1
oca6_72	oca6Δ	CAN1	939	940	1	C	DEL	6	Deletion	6	1	1		GCTGGTGAAGCTGCAAACCCCAGAAAATCCGTTCCAAGAGC	CCA	0
oca6_73	oca6Δ	CAN1	470	470	1	C	G	15	SNP	10	0.667	1		ATCCTCTTTCACAGTGTTCTCACAAAGATTCCTTTCTCCAG	TCA	1
oca6_74	oca6Δ	CAN1	901	901	1	G	A	6	SNP	5	0.833	1		CCTTCACATTTCAAGGTACTGAACTAGTTGGTATCACTGCT	TGA	1
oca6_75	oca6Δ	CAN1	452	452	1	C	T	12	SNP	9	0.75	1		TACATTCACCCCTGTTACATCCTCTTTCACAGTGTTCTCAC	TCC	1
oca6_76	oca6Δ	CAN1	1175	1175	1	C	G	6	SNP	5	0.833	1		CATTATTTCTGCCGCAAATTCAAATATTTACGTTGGTTCCC	TCA	1
oca6_77	oca6Δ	CAN1	374	374	1	C	A	10	SNP	9	0.9	1		CCCAGTGGGCGCTCTTATATCATATTTATTTATGGGTTCTT	TCA	1
oca6_78	oca6Δ	CAN1	1403	1403	1	C	G	8	SNP	8	1	1		TTTTGCATGGTTATTTATCTCAATCTCGCACATCAGATTTA	TCA	1
oca6_79	oca6Δ	CAN1	374	374	1	C	G	4	SNP	4	1	1		CCCAGTGGGCGCTCTTATATCATATTTATTTATGGGTTCTT	TCA	1
oca6_80	oca6Δ	CAN1	1403	1403	1	C	G	4	SNP	3	0.75	1		TTTTGCATGGTTATTTATCTCAATCTCGCACATCAGATTTA	TCA	1
oca6_81	oca6Δ	CAN1	577	577	1	C	T	15	SNP	13	0.867	1		GTGTAGTTGGCCAAGTCATTCAATTTTGGACGTACAAAGTT	TCA	1
oca6_82	oca6Δ	CAN1	901	901	1	G	A	9	SNP	7	0.778	1		CCTTCACATTTCAAGGTACTGAACTAGTTGGTATCACTGCT	TGA	1
oca6_83	oca6Δ	CAN1	470	470	1	C	G	11	SNP	8	0.727	1		ATCCTCTTTCACAGTGTTCTCACAAAGATTCCTTTCTCCAG	TCA	1
oca6_85	oca6Δ	CAN1	585	585	1	G	A	15	SNP	11	0.733	1		GGCCAAGTCATTCAATTTTGGACGTACAAAGTTCCACTGGC	GGA	1
oca6_86	oca6Δ	CAN1	718	718	1	G	C	5	SNP	3	0.6	1		TCAAAGTTTTAGCCATTATCGGGTTTCTAATATACTGTTTT	CGG	0
oca6_87	oca6Δ	CAN1	113	113	1	C	G	6	SNP	5	0.833	2	603	AACACACCACAGACGTGGGTCAATACCATTAAAAGATGAGA	TCA	1
oca6_87	oca6Δ	CAN1	717	717	1	C	G	6	SNP	5	0.833	2		ATCAAAGTTTTAGCCATTATCGGGTTTCTAATATACTGTTT	TCG	1
oca6_88	oca6Δ	CAN1	1403	1403	1	C	G	2	SNP	2	1	1		TTTTGCATGGTTATTTATCTCAATCTCGCACATCAGATTTA	TCA	1
oca6_89	oca6Δ	CAN1	392	392	1	C	T	4	SNP	3	0.75	2	851	ATCATATTTATTTATGGGTTCTTTGGCATATTCTGTCACGC	TCT	1
oca6_89	oca6Δ	CAN1	1244	1244	1	C	G	4	SNP	3	0.75	2		GTTGGCTCCTAAATTCCTGTCAAGGACCACCAAAGGTGGTG	TCA	1
oca6_90	oca6Δ	CAN1	452	452	1	C	T	9	SNP	6	0.667	1		TACATTCACCCCTGTTACATCCTCTTTCACAGTGTTCTCAC	TCC	1
oca6_92	oca6Δ	CAN1	455	455	1	C	T	7	SNP	3	0.429	1		ATTCACCCCTGTTACATCCTCTTTCACAGTGTTCTCACAAA	TCT	1
oca6_93	oca6Δ	CAN1	901	901	1	G	A	2	SNP	2	1	1		CCTTCACATTTCAAGGTACTGAACTAGTTGGTATCACTGCT	TGA	1
oca6_95	oca6Δ	CAN1	352	352	1	G	A	9	SNP	7	0.778	1		CCACACCTCTGACCAACGCCGGCCCAGTGGGCGCTCTTATA	CGG	0
oca6_96	oca6Δ	CAN1	577	577	1	C	T	6	SNP	5	0.833	1		GTGTAGTTGGCCAAGTCATTCAATTTTGGACGTACAAAGTT	TCA	1
pif1_1	pif1Δ	CAN1	1214	1214	1	C	G	8	SNP	5	0.625	1		CCGTATTTTATTTGGTCTATCAAAGAACAAGTTGGCTCCTA	TCA	1
pif1_101	pif1Δ	CAN1	1195	1195	1	C	G	18	SNP	17	0.944	1		CAAATATTTACGTTGGTTCCCGTATTTTATTTGGTCTATCA	CCG	0
pif1_102	pif1Δ	CAN1	550	550	1	G	A	20	SNP	20	1	1		GGGCAATCACTTTTGCCCTGGAACTTAGTGTAGTTGGCCAA	GGA	1
pif1_103	pif1Δ	CAN1	585	585	1	G	A	14	SNP	14	1	1		GGCCAAGTCATTCAATTTTGGACGTACAAAGTTCCACTGGC	GGA	1
pif1_105	pif1Δ	CAN1	612	612	1	G	A	5	SNP	4	0.8	1		AAAGTTCCACTGGCGGCATGGATTAGTATTTTTTGGGTAAT	GGA	1
pif1_107	pif1Δ	CAN1	1175	1175	1	C	T	16	SNP	16	1	1		CATTATTTCTGCCGCAAATTCAAATATTTACGTTGGTTCCC	TCA	1
pif1_108	pif1Δ	CAN1	1623	1623	1	G	A	5	SNP	5	1	1		TTCCTGTTCTTAGCTGTTTGGATCTTATTTCAATGCATATT	GGA	1
pif1_109	pif1Δ	CAN1	452	452	1	C	T	3	SNP	3	1	1		TACATTCACCCCTGTTACATCCTCTTTCACAGTGTTCTCAC	TCC	1
pif1_11	pif1Δ	CAN1	591	591	1	C	A	5	SNP	4	0.8	1		GTCATTCAATTTTGGACGTACAAAGTTCCACTGGCGGCATG	ACA	0
pif1_111	pif1Δ	CAN1	980	980	1	G	T	4	SNP	4	1	1		CATCAAAAAAGTTGTTTTCCGTATCTTAACCTTCTACATTG	CGT	0
pif1_112	pif1Δ	CAN1	1244	1244	1	C	G	4	SNP	3	0.75	1		GTTGGCTCCTAAATTCCTGTCAAGGACCACCAAAGGTGGTG	TCA	1
pif1_113	pif1Δ	CAN1	1163	1163	1	C	T	48	SNP	48	1	1		TATCTTAACAACCATTATTTCTGCCGCAAATTCAAATATTT	TCT	1
pif1_114	pif1Δ	CAN1	527	527	1	C	T	8	SNP	6	0.75	2	1116	TGGTTACATGTATTGGTTTTCTTGGGCAATCACTTTTGCCC	TCT	1
pif1_114	pif1Δ	CAN1	1644	1644	1	C	T	8	SNP	7	0.875	2		ATCTTATTTCAATGCATATTCAGATGCAGATTTATTTGGAA	TCA	1
pif1_115	pif1Δ	CAN1	452	452	1	C	T	19	SNP	19	1	1		TACATTCACCCCTGTTACATCCTCTTTCACAGTGTTCTCAC	TCC	1
pif1_116	pif1Δ	CAN1	892	892	1	C	T	21	SNP	20	0.952	1		TTAACGCTGCCTTCACATTTCAAGGTACTGAACTAGTTGGT	TCA	1
pif1_117	pif1Δ	CAN1	1537	1537	1	C	T	33	SNP	29	0.879	1		TGACGATCATTATCATTATTCAAGGTTTCACGGCTTTTGCA	TCA	1
pif1_118	pif1Δ	CAN1	527	527	1	C	T	8	SNP	8	1	1		TGGTTACATGTATTGGTTTTCTTGGGCAATCACTTTTGCCC	TCT	1
pif1_13	pif1Δ	CAN1	424	424	1	G	A	6	SNP	2	0.333	1		CTGTCACGCAGTCCTTGGGTGAAATGGCTACATTCACCCCT	TGA	1
pif1_18	pif1Δ	CAN1	1214	1214	1	C	T	4	SNP	2	0.5	1		CCGTATTTTATTTGGTCTATCAAAGAACAAGTTGGCTCCTA	TCA	1
pif1_20	pif1Δ	CAN1	113	113	1	C	G	6	SNP	2	0.333	2	1293	AACACACCACAGACGTGGGTCAATACCATTAAAAGATGAGA	TCA	1
pif1_20	pif1Δ	CAN1	1407	1407	1	C	G	6	SNP	2	0.333	2		GCATGGTTATTTATCTCAATCTCGCACATCAGATTTATGCA	TCT	1
pif1_22	pif1Δ	CAN1	901	901	1	G	A	5	SNP	2	0.4	1		CCTTCACATTTCAAGGTACTGAACTAGTTGGTATCACTGCT	TGA	1
pif1_23	pif1Δ	CAN1	452	452	1	C	T	9	SNP	4	0.444	1		TACATTCACCCCTGTTACATCCTCTTTCACAGTGTTCTCAC	TCC	1
pif1_24	pif1Δ	CAN1	892	892	1	C	T	9	SNP	3	0.333	1		TTAACGCTGCCTTCACATTTCAAGGTACTGAACTAGTTGGT	TCA	1
pif1_3	pif1Δ	CAN1	1214	1214	1	C	T	5	SNP	3	0.6	1		CCGTATTTTATTTGGTCTATCAAAGAACAAGTTGGCTCCTA	TCA	1
pif1_33	pif1Δ	CAN1	452	452	1	C	T	3	SNP	2	0.667	1		TACATTCACCCCTGTTACATCCTCTTTCACAGTGTTCTCAC	TCC	1
pif1_35	pif1Δ	CAN1	1214	1214	1	C	T	8	SNP	3	0.375	1		CCGTATTTTATTTGGTCTATCAAAGAACAAGTTGGCTCCTA	TCA	1
pif1_37	pif1Δ	CAN1	679	679	1	G	A	7	SNP	2	0.286	1		TCAAATATTACGGTGAATTCGAGTTCTGGGTCGCTTCCATC	CGA	1
pif1_40	pif1Δ	CAN1	1193	1193	1	C	T	7	SNP	2	0.286	1		TTCAAATATTTACGTTGGTTCCCGTATTTTATTTGGTCTAT	TCC	1
pif1_41	pif1Δ	CAN1	295	295	1	G	C	4	SNP	2	0.5	2	0	ATATTGGTATGATTGCCCTTGGTGGTACTATTGGTACAGGT	TGG	0
pif1_41	pif1Δ	CAN1	296	296	1	G	T	4	SNP	2	0.5	2		TATTGGTATGATTGCCCTTGGTGGTACTATTGGTACAGGTC	GGT	0
pif1_43	pif1Δ	CAN1	591	591	1	C	A	12	SNP	6	0.5	1		GTCATTCAATTTTGGACGTACAAAGTTCCACTGGCGGCATG	ACA	0
pif1_44	pif1Δ	CAN1	1193	1193	1	C	T	8	SNP	4	0.5	1		TTCAAATATTTACGTTGGTTCCCGTATTTTATTTGGTCTAT	TCC	1
pif1_45	pif1Δ	CAN1	424	424	1	G	A	12	SNP	4	0.333	1		CTGTCACGCAGTCCTTGGGTGAAATGGCTACATTCACCCCT	TGA	1
pif1_7	pif1Δ	CAN1	1214	1214	1	C	G	4	SNP	3	0.75	1		CCGTATTTTATTTGGTCTATCAAAGAACAAGTTGGCTCCTA	TCA	1
pif1_8	pif1Δ	CAN1	656	656	1	C	T	4	SNP	4	1	1		CACAATAATGAACTTGTTCCCTGTCAAATATTACGGTGAAT	CCT	0
pif1_9	pif1Δ	CAN1	577	577	1	C	T	3	SNP	2	0.667	1		GTGTAGTTGGCCAAGTCATTCAATTTTGGACGTACAAAGTT	TCA	1
pmt6_006	pmt6Δ	CAN1	901	901	1	G	A	4	SNP	2	0.5	1		CCTTCACATTTCAAGGTACTGAACTAGTTGGTATCACTGCT	TGA	1
pmt6_014	pmt6Δ	CAN1	1035	1035	1	C	G	5	SNP	3	0.6	1		ATTGGACTTTTAGTTCCATACAATGACCCTAAACTAACACA	ACA	0
pmt6_015	pmt6Δ	CAN1	452	452	1	C	T	2	SNP	2	1	1		TACATTCACCCCTGTTACATCCTCTTTCACAGTGTTCTCAC	TCC	1
pmt6_018	pmt6Δ	CAN1	424	424	1	G	A	9	SNP	6	0.667	1		CTGTCACGCAGTCCTTGGGTGAAATGGCTACATTCACCCCT	TGA	1
pmt6_020	pmt6Δ	CAN1	1537	1537	1	C	T	10	SNP	5	0.5	1		TGACGATCATTATCATTATTCAAGGTTTCACGGCTTTTGCA	TCA	1
pmt6_023	pmt6Δ	CAN1	424	424	1	G	A	9	SNP	8	0.889	1		CTGTCACGCAGTCCTTGGGTGAAATGGCTACATTCACCCCT	TGA	1
pmt6_024	pmt6Δ	CAN1	892	892	1	C	T	7	SNP	4	0.571	1		TTAACGCTGCCTTCACATTTCAAGGTACTGAACTAGTTGGT	TCA	1
pmt6_041	pmt6Δ	CAN1	1175	1175	1	C	T	2	SNP	2	1	1		CATTATTTCTGCCGCAAATTCAAATATTTACGTTGGTTCCC	TCA	1
pmt6_043	pmt6Δ	CAN1	892	892	1	C	T	3	SNP	2	0.667	1		TTAACGCTGCCTTCACATTTCAAGGTACTGAACTAGTTGGT	TCA	1
pmt6_048	pmt6Δ	CAN1	1403	1403	1	C	G	2	SNP	2	1	1		TTTTGCATGGTTATTTATCTCAATCTCGCACATCAGATTTA	TCA	1
pmt6_101	pmt6Δ	CAN1	1214	1214	1	C	G	28	SNP	26	0.929	1		CCGTATTTTATTTGGTCTATCAAAGAACAAGTTGGCTCCTA	TCA	1
pmt6_102	pmt6Δ	CAN1	585	585	1	G	A	13	SNP	13	1	1		GGCCAAGTCATTCAATTTTGGACGTACAAAGTTCCACTGGC	GGA	1
pmt6_103	pmt6Δ	CAN1	1633	1633	1	C	T	20	SNP	18	0.9	1		TAGCTGTTTGGATCTTATTTCAATGCATATTCAGATGCAGA	TCA	1
pmt6_104	pmt6Δ	CAN1	718	718	1	G	A	23	SNP	23	1	1		TCAAAGTTTTAGCCATTATCGGGTTTCTAATATACTGTTTT	CGG	0
pmt6_105	pmt6Δ	CAN1	1537	1537	1	C	T	25	SNP	25	1	1		TGACGATCATTATCATTATTCAAGGTTTCACGGCTTTTGCA	TCA	1
pmt6_106	pmt6Δ	CAN1	577	577	1	C	T	25	SNP	24	0.96	1		GTGTAGTTGGCCAAGTCATTCAATTTTGGACGTACAAAGTT	TCA	1
pmt6_107	pmt6Δ	CAN1	1633	1633	2	INS	TT	28	Insertion	24	0.857	2	0	TAGCTGTTTGGATCTTATTTCAATGCATATTCAGATGCAG		0
pmt6_107	pmt6Δ	CAN1	1633	1633	1	C	G	28	SNP	24	0.857	2		TAGCTGTTTGGATCTTATTTCAATGCATATTCAGATGCAGA	TCA	1
pmt6_108	pmt6Δ	CAN1	509	509	1	G	A	32	SNP	32	1	1		AGCATTTGGTGCGGCCAATGGTTACATGTATTGGTTTTCTT	GGT	0
pmt6_109	pmt6Δ	CAN1	527	527	1	C	T	40	SNP	38	0.95	1		TGGTTACATGTATTGGTTTTCTTGGGCAATCACTTTTGCCC	TCT	1
pmt6_110	pmt6Δ	CAN1	69	69	1	C	T	26	SNP	23	0.885	4	1105	AATGAGCCGGTCACAACCCTCTTTCACGACGTTGAAGCTTC	TCT	1
pmt6_110	pmt6Δ	CAN1	1175	1175	1	C	G	26	SNP	24	0.923	4	68	CATTATTTCTGCCGCAAATTCAAATATTTACGTTGGTTCCC	TCA	1
pmt6_110	pmt6Δ	CAN1	1244	1244	1	C	G	26	SNP	24	0.923	4	285	GTTGGCTCCTAAATTCCTGTCAAGGACCACCAAAGGTGGTG	TCA	1
pmt6_110	pmt6Δ	CAN1	1530	1530	1	C	T	26	SNP	24	0.923	4		ACATTTATGACGATCATTATCATTATTCAAGGTTTCACGGC	TCA	1
pmt6_111	pmt6Δ	CAN1	1214	1214	1	C	T	21	SNP	21	1	1		CCGTATTTTATTTGGTCTATCAAAGAACAAGTTGGCTCCTA	TCA	1
pmt6_112	pmt6Δ	CAN1	679	679	1	G	A	35	SNP	33	0.943	1		TCAAATATTACGGTGAATTCGAGTTCTGGGTCGCTTCCATC	CGA	1
pmt6_113	pmt6Δ	CAN1	925	925	1	G	A	20	SNP	17	0.85	1		TAGTTGGTATCACTGCTGGTGAAGCTGCAAACCCCAGAAAA	TGA	1
pmt6_114	pmt6Δ	CAN1	527	527	1	C	T	33	SNP	25	0.758	1		TGGTTACATGTATTGGTTTTCTTGGGCAATCACTTTTGCCC	TCT	1
pmt6_115	pmt6Δ	CAN1	577	577	1	C	T	23	SNP	23	1	1		GTGTAGTTGGCCAAGTCATTCAATTTTGGACGTACAAAGTT	TCA	1
pmt6_116	pmt6Δ	CAN1	1163	1163	1	C	T	35	SNP	34	0.971	1		TATCTTAACAACCATTATTTCTGCCGCAAATTCAAATATTT	TCT	1
pmt6_117	pmt6Δ	CAN1	424	424	1	G	A	36	SNP	34	0.944	1		CTGTCACGCAGTCCTTGGGTGAAATGGCTACATTCACCCCT	TGA	1
pmt6_118	pmt6Δ	CAN1	452	452	1	C	T	46	SNP	44	0.957	1		TACATTCACCCCTGTTACATCCTCTTTCACAGTGTTCTCAC	TCC	1
pmt6_119	pmt6Δ	CAN1	612	612	1	G	A	52	SNP	51	0.981	1		AAAGTTCCACTGGCGGCATGGATTAGTATTTTTTGGGTAAT	GGA	1
pmt6_120	pmt6Δ	CAN1	979	979	1	C	T	52	SNP	51	0.981	1		CCATCAAAAAAGTTGTTTTCCGTATCTTAACCTTCTACATT	CCG	0
pmt6_121	pmt6Δ	CAN1	1175	1175	1	C	T	30	SNP	28	0.933	1		CATTATTTCTGCCGCAAATTCAAATATTTACGTTGGTTCCC	TCA	1
pmt6_122	pmt6Δ	CAN1	938	938	1	C	T	31	SNP	30	0.968	1		TGCTGGTGAAGCTGCAAACCCCAGAAAATCCGTTCCAAGAG	CCC	0
pmt6_123	pmt6Δ	CAN1	679	679	1	G	A	46	SNP	40	0.87	1		TCAAATATTACGGTGAATTCGAGTTCTGGGTCGCTTCCATC	CGA	1
pmt6_124	pmt6Δ	CAN1	1175	1175	1	C	G	17	SNP	16	0.941	1		CATTATTTCTGCCGCAAATTCAAATATTTACGTTGGTTCCC	TCA	1
pmt6_125	pmt6Δ	CAN1	1214	1214	1	C	T	18	SNP	16	0.889	1		CCGTATTTTATTTGGTCTATCAAAGAACAAGTTGGCTCCTA	TCA	1
pmt6_126	pmt6Δ	CAN1	577	577	1	C	T	44	SNP	39	0.886	1		GTGTAGTTGGCCAAGTCATTCAATTTTGGACGTACAAAGTT	TCA	1
pmt6_127	pmt6Δ	CAN1	424	424	1	G	A	31	SNP	30	0.968	1		CTGTCACGCAGTCCTTGGGTGAAATGGCTACATTCACCCCT	TGA	1
pmt6_128	pmt6Δ	CAN1	892	892	1	C	T	23	SNP	21	0.913	1		TTAACGCTGCCTTCACATTTCAAGGTACTGAACTAGTTGGT	TCA	1
pmt6_129	pmt6Δ	CAN1	1193	1193	1	C	T	29	SNP	28	0.966	1		TTCAAATATTTACGTTGGTTCCCGTATTTTATTTGGTCTAT	TCC	1
pmt6_130	pmt6Δ	CAN1	1633	1633	1	C	T	10	SNP	9	0.9	1		TAGCTGTTTGGATCTTATTTCAATGCATATTCAGATGCAGA	TCA	1
psh1_101	psh1Δ	CAN1	673	673	1	G	A	9	SNP	9	1	1		TCCCTGTCAAATATTACGGTGAATTCGAGTTCTGGGTCGCT	TGA	1
psh1_102	psh1Δ	CAN1	789	789	1	G	A	25	SNP	23	0.92	1		CCAGTTGGATTCCGTTATTGGAGAAACCCAGGTGCCTGGGG	GGA	1
psh1_103	psh1Δ	CAN1	1537	1537	1	C	T	5	SNP	4	0.8	1		TGACGATCATTATCATTATTCAAGGTTTCACGGCTTTTGCA	TCA	1
psh1_104	psh1Δ	CAN1	1537	1537	1	C	T	9	SNP	8	0.889	1		TGACGATCATTATCATTATTCAAGGTTTCACGGCTTTTGCA	TCA	1
psh1_105	psh1Δ	CAN1	1537	1537	1	C	T	15	SNP	14	0.933	1		TGACGATCATTATCATTATTCAAGGTTTCACGGCTTTTGCA	TCA	1
psh1_106	psh1Δ	CAN1	577	577	1	C	T	20	SNP	20	1	1		GTGTAGTTGGCCAAGTCATTCAATTTTGGACGTACAAAGTT	TCA	1
psh1_107	psh1Δ	CAN1	577	577	1	C	T	74	SNP	73	0.986	1		GTGTAGTTGGCCAAGTCATTCAATTTTGGACGTACAAAGTT	TCA	1
psh1_108	psh1Δ	CAN1	1214	1214	1	C	G	53	SNP	47	0.887	1		CCGTATTTTATTTGGTCTATCAAAGAACAAGTTGGCTCCTA	TCA	1
psh1_109	psh1Δ	CAN1	1633	1633	1	C	T	44	SNP	43	0.977	1		TAGCTGTTTGGATCTTATTTCAATGCATATTCAGATGCAGA	TCA	1
psh1_110	psh1Δ	CAN1	679	679	1	G	A	33	SNP	33	1	1		TCAAATATTACGGTGAATTCGAGTTCTGGGTCGCTTCCATC	CGA	1
psh1_111	psh1Δ	CAN1	1195	1195	1	C	T	10	SNP	9	0.9	1		CAAATATTTACGTTGGTTCCCGTATTTTATTTGGTCTATCA	CCG	0
psh1_112	psh1Δ	CAN1	857	857	1	G	A	60	SNP	59	0.983	1		CGAAGGGAGGTTCTTAGGTTGGGTTTCCTCTTTGATTAACG	TGG	0
psh1_113	psh1Δ	CAN1	1214	1214	1	C	T	13	SNP	11	0.846	1		CCGTATTTTATTTGGTCTATCAAAGAACAAGTTGGCTCCTA	TCA	1
psh1_114	psh1Δ	CAN1	1175	1175	1	C	T	13	SNP	13	1	1		CATTATTTCTGCCGCAAATTCAAATATTTACGTTGGTTCCC	TCA	1
psh1_115	psh1Δ	CAN1	892	892	1	C	T	17	SNP	17	1	1		TTAACGCTGCCTTCACATTTCAAGGTACTGAACTAGTTGGT	TCA	1
psh1_116	psh1Δ	CAN1	1214	1214	1	C	G	67	SNP	67	1	1		CCGTATTTTATTTGGTCTATCAAAGAACAAGTTGGCTCCTA	TCA	1
psh1_117	psh1Δ	CAN1	1163	1163	1	C	T	47	SNP	46	0.979	1		TATCTTAACAACCATTATTTCTGCCGCAAATTCAAATATTT	TCT	1
psh1_118	psh1Δ	CAN1	1175	1175	1	C	T	21	SNP	20	0.952	1		CATTATTTCTGCCGCAAATTCAAATATTTACGTTGGTTCCC	TCA	1
psh1_119	psh1Δ	CAN1	577	577	1	C	T	23	SNP	23	1	1		GTGTAGTTGGCCAAGTCATTCAATTTTGGACGTACAAAGTT	TCA	1
psh1_120	psh1Δ	CAN1	1214	1214	1	C	T	58	SNP	58	1	1		CCGTATTTTATTTGGTCTATCAAAGAACAAGTTGGCTCCTA	TCA	1
psh1_121	psh1Δ	CAN1	1214	1214	1	C	T	14	SNP	14	1	1		CCGTATTTTATTTGGTCTATCAAAGAACAAGTTGGCTCCTA	TCA	1
psh1_122	psh1Δ	CAN1	452	452	1	C	T	56	SNP	54	0.964	1		TACATTCACCCCTGTTACATCCTCTTTCACAGTGTTCTCAC	TCC	1
psh1_123	psh1Δ	CAN1	1487	1487	1	C	T	28	SNP	28	1	1		ATTTAAAGCTAAATTAATGCCCGGCTTGGCTTATTATGCGG	CCC	0
psh1_124	psh1Δ	CAN1	585	585	1	G	A	22	SNP	22	1	1		GGCCAAGTCATTCAATTTTGGACGTACAAAGTTCCACTGGC	GGA	1
psh1_125	psh1Δ	CAN1	1163	1163	1	C	T	39	SNP	39	1	1		TATCTTAACAACCATTATTTCTGCCGCAAATTCAAATATTT	TCT	1
psh1_126	psh1Δ	CAN1	452	452	1	C	T	45	SNP	40	0.889	1		TACATTCACCCCTGTTACATCCTCTTTCACAGTGTTCTCAC	TCC	1
psh1_127	psh1Δ	CAN1	854	854	1	G	T	28	SNP	26	0.929	3	4	AAACGAAGGGAGGTTCTTAGGTTGGGTTTCCTCTTTGATTA	GGT	0
psh1_127	psh1Δ	CAN1	859	859	1	G	T	28	SNP	27	0.964	3	4	AAGGGAGGTTCTTAGGTTGGGTTTCCTCTTTGATTAACGCT	GGT	0
psh1_127	psh1Δ	CAN1	864	865	1	C	DEL	28	Deletion	26	0.929	3		AGGTTCTTAGGTTGGGTTTCCTCTTTGATTAACGCTGCCTT	CCT	0
psh1_128	psh1Δ	CAN1	577	577	1	C	T	31	SNP	28	0.903	1		GTGTAGTTGGCCAAGTCATTCAATTTTGGACGTACAAAGTT	TCA	1
psh1_129	psh1Δ	CAN1	679	679	1	G	A	28	SNP	28	1	1		TCAAATATTACGGTGAATTCGAGTTCTGGGTCGCTTCCATC	CGA	1
psh1_130	psh1Δ	CAN1	1537	1537	1	C	T	45	SNP	44	0.978	1		TGACGATCATTATCATTATTCAAGGTTTCACGGCTTTTGCA	TCA	1
psh1_49	psh1Δ	CAN1	1214	1214	1	C	G	4	SNP	2	0.5	1		CCGTATTTTATTTGGTCTATCAAAGAACAAGTTGGCTCCTA	TCA	1
psh1_51	psh1Δ	CAN1	1175	1175	1	C	G	5	SNP	2	0.4	1		CATTATTTCTGCCGCAAATTCAAATATTTACGTTGGTTCCC	TCA	1
psh1_53	psh1Δ	CAN1	979	979	1	C	T	9	SNP	4	0.444	1		CCATCAAAAAAGTTGTTTTCCGTATCTTAACCTTCTACATT	CCG	0
psh1_56	psh1Δ	CAN1	857	857	1	G	A	7	SNP	4	0.571	1		CGAAGGGAGGTTCTTAGGTTGGGTTTCCTCTTTGATTAACG	TGG	0
psh1_57	psh1Δ	CAN1	577	577	1	C	T	5	SNP	3	0.6	1		GTGTAGTTGGCCAAGTCATTCAATTTTGGACGTACAAAGTT	TCA	1
psh1_60	psh1Δ	CAN1	113	113	1	C	G	12	SNP	7	0.583	1		AACACACCACAGACGTGGGTCAATACCATTAAAAGATGAGA	TCA	1
psh1_61	psh1Δ	CAN1	453	454	1	C	DEL	5	Deletion	2	0.4	1		ACATTCACCCCTGTTACATCCTCTTTCACAGTGTTCTCACA	CCT	0
psh1_64	psh1Δ	CAN1	1175	1175	1	C	G	6	SNP	3	0.5	1		CATTATTTCTGCCGCAAATTCAAATATTTACGTTGGTTCCC	TCA	1
psh1_65	psh1Δ	CAN1	1195	1195	1	C	T	6	SNP	4	0.667	1		CAAATATTTACGTTGGTTCCCGTATTTTATTTGGTCTATCA	CCG	0
psh1_66	psh1Δ	CAN1	1020	1020	18	INS	CTCTCTATTATTCATTGG	6	Insertion	5	0.833	1		GCTCTCTATTATTCATTGGACTTTTAGTTCCATACAATGA		0
psh1_68	psh1Δ	CAN1	1244	1244	1	C	G	4	SNP	3	0.75	1		GTTGGCTCCTAAATTCCTGTCAAGGACCACCAAAGGTGGTG	TCA	1
psh1_69	psh1Δ	CAN1	1214	1214	1	C	T	4	SNP	2	0.5	1		CCGTATTTTATTTGGTCTATCAAAGAACAAGTTGGCTCCTA	TCA	1
psh1_73	psh1Δ	CAN1	1175	1175	1	C	T	10	SNP	5	0.5	1		CATTATTTCTGCCGCAAATTCAAATATTTACGTTGGTTCCC	TCA	1
psh1_74	psh1Δ	CAN1	1214	1214	1	C	T	5	SNP	4	0.8	1		CCGTATTTTATTTGGTCTATCAAAGAACAAGTTGGCTCCTA	TCA	1
psh1_75	psh1Δ	CAN1	1175	1175	1	C	G	9	SNP	8	0.889	1		CATTATTTCTGCCGCAAATTCAAATATTTACGTTGGTTCCC	TCA	1
psh1_78	psh1Δ	CAN1	1214	1214	1	C	G	6	SNP	4	0.667	1		CCGTATTTTATTTGGTCTATCAAAGAACAAGTTGGCTCCTA	TCA	1
psh1_79	psh1Δ	CAN1	1214	1214	1	C	G	5	SNP	2	0.4	1		CCGTATTTTATTTGGTCTATCAAAGAACAAGTTGGCTCCTA	TCA	1
psh1_81	psh1Δ	CAN1	1214	1214	1	C	G	6	SNP	4	0.667	1		CCGTATTTTATTTGGTCTATCAAAGAACAAGTTGGCTCCTA	TCA	1
psh1_85	psh1Δ	CAN1	1537	1537	1	C	T	5	SNP	2	0.4	1		TGACGATCATTATCATTATTCAAGGTTTCACGGCTTTTGCA	TCA	1
psh1_86	psh1Δ	CAN1	1214	1214	1	C	G	5	SNP	4	0.8	1		CCGTATTTTATTTGGTCTATCAAAGAACAAGTTGGCTCCTA	TCA	1
psh1_87	psh1Δ	CAN1	1214	1214	1	C	T	3	SNP	3	1	1		CCGTATTTTATTTGGTCTATCAAAGAACAAGTTGGCTCCTA	TCA	1
psh1_88	psh1Δ	CAN1	584	584	1	G	A	9	SNP	6	0.667	1		TGGCCAAGTCATTCAATTTTGGACGTACAAAGTTCCACTGG	TGG	0
psh1_90	psh1Δ	CAN1	979	979	1	C	G	4	SNP	3	0.75	1		CCATCAAAAAAGTTGTTTTCCGTATCTTAACCTTCTACATT	CCG	0
psh1_92	psh1Δ	CAN1	452	452	1	C	T	7	SNP	4	0.571	1		TACATTCACCCCTGTTACATCCTCTTTCACAGTGTTCTCAC	TCC	1
psh1_95	psh1Δ	CAN1	1537	1537	1	C	T	4	SNP	2	0.5	1		TGACGATCATTATCATTATTCAAGGTTTCACGGCTTTTGCA	TCA	1
psh1_96	psh1Δ	CAN1	789	789	1	G	A	3	SNP	2	0.667	1		CCAGTTGGATTCCGTTATTGGAGAAACCCAGGTGCCTGGGG	GGA	1
rad27_10	rad27Δ	CAN1	1349	1349	1	INS	G	5	Insertion	2	0.4	1		GGTGGTGACAAAGTTTTCGAATGGCTATTAAATATCACTG		0
rad27_101	rad27Δ	CAN1	577	577	1	C	T	31	SNP	31	1	1		GTGTAGTTGGCCAAGTCATTCAATTTTGGACGTACAAAGTT	TCA	1
rad27_102	rad27Δ	CAN1	1244	1244	1	C	G	15	SNP	14	0.933	1		GTTGGCTCCTAAATTCCTGTCAAGGACCACCAAAGGTGGTG	TCA	1
rad27_103	rad27Δ	CAN1	1193	1193	1	C	T	24	SNP	24	1	1		TTCAAATATTTACGTTGGTTCCCGTATTTTATTTGGTCTAT	TCC	1
rad27_104	rad27Δ	CAN1	1214	1214	1	C	G	15	SNP	15	1	1		CCGTATTTTATTTGGTCTATCAAAGAACAAGTTGGCTCCTA	TCA	1
rad27_105	rad27Δ	CAN1	374	374	1	C	G	25	SNP	25	1	2	303	CCCAGTGGGCGCTCTTATATCATATTTATTTATGGGTTCTT	TCA	1
rad27_105	rad27Δ	CAN1	678	678	1	C	T	25	SNP	25	1	2		GTCAAATATTACGGTGAATTCGAGTTCTGGGTCGCTTCCAT	TCG	1
rad27_106	rad27Δ	CAN1	1403	1403	1	C	G	18	SNP	18	1	1		TTTTGCATGGTTATTTATCTCAATCTCGCACATCAGATTTA	TCA	1
rad27_107	rad27Δ	CAN1	11	11	1	C	T	19	SNP	19	1	3	101	ATGACAAATTCAAAAGAAGACGCCGACATAG	TCA	1
rad27_107	rad27Δ	CAN1	113	113	1	C	A	19	SNP	19	1	3	1096	AACACACCACAGACGTGGGTCAATACCATTAAAAGATGAGA	TCA	1
rad27_107	rad27Δ	CAN1	1210	1210	1	C	G	19	SNP	19	1	3		GTTCCCGTATTTTATTTGGTCTATCAAAGAACAAGTTGGCT	TCT	1
rad27_108	rad27Δ	CAN1	1618	1618	38	INS	TTGCTGCCGCCTATATCTCTATTTTCCTGTTCTTAGCT	17	Insertion	11	0.647	1		TGTTTTCCTGTTCTTAGCTGTTTGGATCTTATTTCAATGC		0
rad27_110	rad27Δ	CAN1	1214	1214	1	C	G	17	SNP	17	1	1		CCGTATTTTATTTGGTCTATCAAAGAACAAGTTGGCTCCTA	TCA	1
rad27_111	rad27Δ	CAN1	113	113	1	C	G	17	SNP	16	0.941	1		AACACACCACAGACGTGGGTCAATACCATTAAAAGATGAGA	TCA	1
rad27_112	rad27Δ	CAN1	1214	1214	1	C	T	16	SNP	16	1	1		CCGTATTTTATTTGGTCTATCAAAGAACAAGTTGGCTCCTA	TCA	1
rad27_113	rad27Δ	CAN1	1214	1214	1	C	G	11	SNP	11	1	1		CCGTATTTTATTTGGTCTATCAAAGAACAAGTTGGCTCCTA	TCA	1
rad27_114	rad27Δ	CAN1	1214	1214	1	C	G	16	SNP	16	1	1		CCGTATTTTATTTGGTCTATCAAAGAACAAGTTGGCTCCTA	TCA	1
rad27_115	rad27Δ	CAN1	1214	1214	1	C	T	11	SNP	11	1	1		CCGTATTTTATTTGGTCTATCAAAGAACAAGTTGGCTCCTA	TCA	1
rad27_116	rad27Δ	CAN1	1409	1409	1	C	G	35	SNP	34	0.971	1		ATGGTTATTTATCTCAATCTCGCACATCAGATTTATGCAAG	TCG	1
rad27_117	rad27Δ	CAN1	1605	1605	1	INS	T	24	Insertion	22	0.917	2	0	GCCGCCTATATCTCTGTTTTCCTGTTCTTAGCTGTTTGGA		0
rad27_117	rad27Δ	CAN1	1605	1605	1	C	G	24	SNP	22	0.917	2		GCCGCCTATATCTCTGTTTTCCTGTTCTTAGCTGTTTGGAT	TCC	1
rad27_118	rad27Δ	CAN1	1214	1214	1	C	T	22	SNP	22	1	1		CCGTATTTTATTTGGTCTATCAAAGAACAAGTTGGCTCCTA	TCA	1
rad27_119	rad27Δ	CAN1	979	979	1	C	T	29	SNP	29	1	1		CCATCAAAAAAGTTGTTTTCCGTATCTTAACCTTCTACATT	CCG	0
rad27_12	rad27Δ	CAN1	1163	1163	1	C	T	7	SNP	6	0.857	1		TATCTTAACAACCATTATTTCTGCCGCAAATTCAAATATTT	TCT	1
rad27_120	rad27Δ	CAN1	892	892	1	C	T	12	SNP	11	0.917	1		TTAACGCTGCCTTCACATTTCAAGGTACTGAACTAGTTGGT	TCA	1
rad27_121	rad27Δ	CAN1	113	113	1	C	G	13	SNP	13	1	1		AACACACCACAGACGTGGGTCAATACCATTAAAAGATGAGA	TCA	1
rad27_122	rad27Δ	CAN1	374	374	1	C	G	8	SNP	8	1	1		CCCAGTGGGCGCTCTTATATCATATTTATTTATGGGTTCTT	TCA	1
rad27_123	rad27Δ	CAN1	455	455	1	C	T	13	SNP	13	1	1		ATTCACCCCTGTTACATCCTCTTTCACAGTGTTCTCACAAA	TCT	1
rad27_124	rad27Δ	CAN1	1409	1409	1	C	G	15	SNP	15	1	1		ATGGTTATTTATCTCAATCTCGCACATCAGATTTATGCAAG	TCG	1
rad27_14	rad27Δ	CAN1	925	925	1	G	A	10	SNP	7	0.7	1		TAGTTGGTATCACTGCTGGTGAAGCTGCAAACCCCAGAAAA	TGA	1
rad27_15	rad27Δ	CAN1	1214	1214	1	C	G	4	SNP	4	1	1		CCGTATTTTATTTGGTCTATCAAAGAACAAGTTGGCTCCTA	TCA	1
rad27_17	rad27Δ	CAN1	374	374	1	C	G	5	SNP	3	0.6	1		CCCAGTGGGCGCTCTTATATCATATTTATTTATGGGTTCTT	TCA	1
rad27_18	rad27Δ	CAN1	1214	1214	1	C	G	3	SNP	3	1	1		CCGTATTTTATTTGGTCTATCAAAGAACAAGTTGGCTCCTA	TCA	1
rad27_19	rad27Δ	CAN1	1214	1214	1	C	T	12	SNP	5	0.417	1		CCGTATTTTATTTGGTCTATCAAAGAACAAGTTGGCTCCTA	TCA	1
rad27_20	rad27Δ	CAN1	973	973	1	G	T	3	SNP	3	1	2	4	CAAGAGCCATCAAAAAAGTTGTTTTCCGTATCTTAACCTTC	TGT	0
rad27_20	rad27Δ	CAN1	978	978	1	C	T	3	SNP	3	1	2		GCCATCAAAAAAGTTGTTTTCCGTATCTTAACCTTCTACAT	TCC	1
rad27_21	rad27Δ	CAN1	1131	1131	2	INS	AT	5	Insertion	4	0.8	2	0	CAAAGGTTTTGCCACATATCTTCAACGCTGTTATCTTAAC		0
rad27_21	rad27Δ	CAN1	1131	1131	1	C	G	5	SNP	4	0.8	2		ACAAAGGTTTTGCCACATATCTTCAACGCTGTTATCTTAAC	TCT	1
rad27_22	rad27Δ	CAN1	1175	1175	1	C	G	6	SNP	5	0.833	1		CATTATTTCTGCCGCAAATTCAAATATTTACGTTGGTTCCC	TCA	1
rad27_23	rad27Δ	CAN1	374	374	1	C	G	6	SNP	4	0.667	1		CCCAGTGGGCGCTCTTATATCATATTTATTTATGGGTTCTT	TCA	1
rad27_24	rad27Δ	CAN1	910	910	1	G	C	4	SNP	3	0.75	1		TTCAAGGTACTGAACTAGTTGGTATCACTGCTGGTGAAGCT	TGG	0
rad27_25	rad27Δ	CAN1	424	424	1	G	A	10	SNP	9	0.9	1		CTGTCACGCAGTCCTTGGGTGAAATGGCTACATTCACCCCT	TGA	1
rad27_26	rad27Δ	CAN1	1214	1214	1	C	G	9	SNP	5	0.556	1		CCGTATTTTATTTGGTCTATCAAAGAACAAGTTGGCTCCTA	TCA	1
rad27_28	rad27Δ	CAN1	452	452	1	C	T	17	SNP	11	0.647	1		TACATTCACCCCTGTTACATCCTCTTTCACAGTGTTCTCAC	TCC	1
rad27_3	rad27Δ	CAN1	1409	1409	1	C	G	7	SNP	5	0.714	1		ATGGTTATTTATCTCAATCTCGCACATCAGATTTATGCAAG	TCG	1
rad27_30	rad27Δ	CAN1	308	308	18	INS	CCCTTGGTGGTACTATTG	9	Insertion	8	0.889	1		GCCCTTGGTGGTACTATTGGTACAGGTCTTTTCATTGGTT		0
rad27_31	rad27Δ	CAN1	789	789	1	G	C	3	SNP	2	0.667	1		CCAGTTGGATTCCGTTATTGGAGAAACCCAGGTGCCTGGGG	GGA	1
rad27_32	rad27Δ	CAN1	577	577	1	C	T	6	SNP	4	0.667	1		GTGTAGTTGGCCAAGTCATTCAATTTTGGACGTACAAAGTT	TCA	1
rad27_33	rad27Δ	CAN1	1284	1284	1	C	T	6	SNP	6	1	1		GTTCCATACATTGCAGTTTTCGTTACTGCTGCATTTGGCGC	TCG	1
rad27_34	rad27Δ	CAN1	311	311	27	INS	TGATTGCCCTTGGTGGTACTATTGGTA	5	Insertion	5	1	1		CTTGGTGGTACTATTGGTACAGGTCTTTTCATTGGTTTAT		0
rad27_37	rad27Δ	CAN1	1214	1214	1	C	T	9	SNP	6	0.667	1		CCGTATTTTATTTGGTCTATCAAAGAACAAGTTGGCTCCTA	TCA	1
rad27_39	rad27Δ	CAN1	1537	1538	1	C	DEL	2	Deletion	2	1	1		TGACGATCATTATCATTATTCAAGGTTTCACGGCTTTTGCA	TCA	1
rad27_4	rad27Δ	CAN1	89	89	1	C	G	5	SNP	2	0.4	1		CTTTCACGACGTTGAAGCTTCACAAACACACCACAGACGTG	TCA	1
rad27_41	rad27Δ	CAN1	1403	1403	1	C	G	5	SNP	4	0.8	1		TTTTGCATGGTTATTTATCTCAATCTCGCACATCAGATTTA	TCA	1
rad27_44	rad27Δ	CAN1	1214	1214	1	C	G	5	SNP	2	0.4	1		CCGTATTTTATTTGGTCTATCAAAGAACAAGTTGGCTCCTA	TCA	1
rad27_45	rad27Δ	CAN1	905	905	1	T	G	6	SNP	6	1	1		CACATTTCAAGGTACTGAACTAGTTGGTATCACTGCTGGTG	CTA	0
rad27_46	rad27Δ	CAN1	311	311	27	INS	TGATTGCCCTTGGTGGTACTATTGGTA	9	Insertion	4	0.444	1		CTTGGTGGTACTATTGGTACAGGTCTTTTCATTGGTTTAT		0
rad27_47	rad27Δ	CAN1	550	550	1	G	C	3	SNP	2	0.667	1		GGGCAATCACTTTTGCCCTGGAACTTAGTGTAGTTGGCCAA	GGA	1
rad27_48	rad27Δ	CAN1	585	585	1	G	A	4	SNP	3	0.75	1		GGCCAAGTCATTCAATTTTGGACGTACAAAGTTCCACTGGC	GGA	1
rad27_5	rad27Δ	CAN1	978	978	1	INS	T	2	Insertion	2	1	2	0	CCATCAAAAAAGTTGTTTTCCGTATCTTAACCTTCTACAT		0
rad27_5	rad27Δ	CAN1	978	978	1	C	G	2	SNP	2	1	2		GCCATCAAAAAAGTTGTTTTCCGTATCTTAACCTTCTACAT	TCC	1
rad27_7	rad27Δ	CAN1	1175	1175	1	C	G	3	SNP	2	0.667	1		CATTATTTCTGCCGCAAATTCAAATATTTACGTTGGTTCCC	TCA	1
rad27_8	rad27Δ	CAN1	892	892	1	C	T	8	SNP	4	0.5	1		TTAACGCTGCCTTCACATTTCAAGGTACTGAACTAGTTGGT	TCA	1
rad27_9	rad27Δ	CAN1	1670	1670	1	G	A	5	SNP	2	0.4	1		CAGATTTATTTGGAAGATTGGAGATGTCGACATCGATTCCG	GGA	1
rad51_04	rad51Δ	CAN1	1284	1285	1	C	DEL	24	Deletion	23	0.958	1		GTTCCATACATTGCAGTTTTCGTTACTGCTGCATTTGGCGC	TCG	1
rad51_12	rad51Δ	CAN1	113	113	1	C	G	9	SNP	4	0.444	1		AACACACCACAGACGTGGGTCAATACCATTAAAAGATGAGA	TCA	1
rad51_13	rad51Δ	CAN1	1214	1214	1	C	G	12	SNP	7	0.583	1		CCGTATTTTATTTGGTCTATCAAAGAACAAGTTGGCTCCTA	TCA	1
rad51_17	rad51Δ	CAN1	76	76	1	G	C	8	SNP	2	0.25	2	410	CGGTCACAACCCTCTTTCACGACGTTGAAGCTTCACAAACA	CGA	1
rad51_17	rad51Δ	CAN1	487	487	1	C	A	8	SNP	2	0.25	2		TCTCACAAAGATTCCTTTCTCCAGCATTTGGTGCGGCCAAT	TCC	1
rad51_18	rad51Δ	CAN1	11	11	1	C	G	12	SNP	5	0.417	1		ATGACAAATTCAAAAGAAGACGCCGACATAG	TCA	1
rad51_19	rad51Δ	CAN1	132	132	1	G	A	8	SNP	3	0.375	1		TCAATACCATTAAAAGATGAGAAAAGTAAAGAATTGTATCC	AGA	1
rad51_2	rad51Δ	CAN1	1409	1409	1	C	G	8	SNP	4	0.5	1		ATGGTTATTTATCTCAATCTCGCACATCAGATTTATGCAAG	TCG	1
rad51_21	rad51Δ	CAN1	892	892	1	C	T	3	SNP	2	0.667	1		TTAACGCTGCCTTCACATTTCAAGGTACTGAACTAGTTGGT	TCA	1
rad51_25	rad51Δ	CAN1	1214	1214	1	C	G	17	SNP	8	0.471	1		CCGTATTTTATTTGGTCTATCAAAGAACAAGTTGGCTCCTA	TCA	1
rad51_26	rad51Δ	CAN1	1214	1214	1	C	G	8	SNP	4	0.5	1		CCGTATTTTATTTGGTCTATCAAAGAACAAGTTGGCTCCTA	TCA	1
rad51_27	rad51Δ	CAN1	441	441	1	C	G	13	SNP	7	0.538	1		GGTGAAATGGCTACATTCACCCCTGTTACATCCTCTTTCAC	CCC	0
rad51_28	rad51Δ	CAN1	1347	1347	1	INS	T	10	Insertion	3	0.3	2	0	CTGGTGGTGACAAAGTTTTCGAATGGCTATTAAATATCAC		0
rad51_28	rad51Δ	CAN1	1347	1347	1	C	G	10	SNP	3	0.3	2		ACTGGTGGTGACAAAGTTTTCGAATGGCTATTAAATATCAC	TCG	1
rad51_29	rad51Δ	CAN1	1214	1214	1	C	G	17	SNP	13	0.765	1		CCGTATTTTATTTGGTCTATCAAAGAACAAGTTGGCTCCTA	TCA	1
rad51_3	rad51Δ	CAN1	1214	1214	1	C	G	10	SNP	3	0.3	1		CCGTATTTTATTTGGTCTATCAAAGAACAAGTTGGCTCCTA	TCA	1
rad51_32	rad51Δ	CAN1	1365	1365	1	C	G	7	SNP	6	0.857	1		TTCGAATGGCTATTAAATATCACTGGTGTTGCAGGCTTTTT	TCA	1
rad51_34	rad51Δ	CAN1	1409	1409	1	C	G	4	SNP	2	0.5	1		ATGGTTATTTATCTCAATCTCGCACATCAGATTTATGCAAG	TCG	1
rad51_36	rad51Δ	CAN1	1214	1214	1	C	G	3	SNP	2	0.667	1		CCGTATTTTATTTGGTCTATCAAAGAACAAGTTGGCTCCTA	TCA	1
rad51_37	rad51Δ	CAN1	1214	1214	1	C	G	10	SNP	5	0.5	1		CCGTATTTTATTTGGTCTATCAAAGAACAAGTTGGCTCCTA	TCA	1
rad51_41	rad51Δ	CAN1	11	11	1	C	G	8	SNP	4	0.5	1		ATGACAAATTCAAAAGAAGACGCCGACATAG	TCA	1
rad51_43	rad51Δ	CAN1	863	863	1	C	G	5	SNP	2	0.4	1		GAGGTTCTTAGGTTGGGTTTCCTCTTTGATTAACGCTGCCT	TCC	1
rad51_44	rad51Δ	CAN1	892	893	1	C	DEL	7	Deletion	4	0.571	1		TTAACGCTGCCTTCACATTTCAAGGTACTGAACTAGTTGGT	TCA	1
rad51_45	rad51Δ	CAN1	1214	1214	1	C	T	14	SNP	7	0.5	1		CCGTATTTTATTTGGTCTATCAAAGAACAAGTTGGCTCCTA	TCA	1
rad51_46	rad51Δ	CAN1	925	925	1	G	A	17	SNP	8	0.471	1		TAGTTGGTATCACTGCTGGTGAAGCTGCAAACCCCAGAAAA	TGA	1
rad51_47	rad51Δ	CAN1	496	496	1	G	C	11	SNP	8	0.727	1		GATTCCTTTCTCCAGCATTTGGTGCGGCCAATGGTTACATG	TGG	0
rad51_5	rad51Δ	CAN1	1214	1214	1	C	G	9	SNP	6	0.667	1		CCGTATTTTATTTGGTCTATCAAAGAACAAGTTGGCTCCTA	TCA	1
rad51_7	rad51Δ	CAN1	113	113	1	C	G	3	SNP	3	1	1		AACACACCACAGACGTGGGTCAATACCATTAAAAGATGAGA	TCA	1
rad54_10	rad54Δ	CAN1	673	673	1	G	C	5	SNP	4	0.8	1		TCCCTGTCAAATATTACGGTGAATTCGAGTTCTGGGTCGCT	TGA	1
rad54_101	rad54Δ	CAN1	1175	1175	1	C	G	20	SNP	20	1	1		CATTATTTCTGCCGCAAATTCAAATATTTACGTTGGTTCCC	TCA	1
rad54_102	rad54Δ	CAN1	374	374	1	C	G	27	SNP	26	0.963	1		CCCAGTGGGCGCTCTTATATCATATTTATTTATGGGTTCTT	TCA	1
rad54_103	rad54Δ	CAN1	11	11	1	C	G	25	SNP	23	0.92	1		ATGACAAATTCAAAAGAAGACGCCGACATAG	TCA	1
rad54_104	rad54Δ	CAN1	1244	1244	1	C	G	19	SNP	17	0.895	1		GTTGGCTCCTAAATTCCTGTCAAGGACCACCAAAGGTGGTG	TCA	1
rad54_105	rad54Δ	CAN1	1214	1214	1	C	G	29	SNP	29	1	1		CCGTATTTTATTTGGTCTATCAAAGAACAAGTTGGCTCCTA	TCA	1
rad54_106	rad54Δ	CAN1	979	980	1	C	DEL	34	Deletion	33	0.971	1		CCATCAAAAAAGTTGTTTTCCGTATCTTAACCTTCTACATT	CCG	0
rad54_107	rad54Δ	CAN1	1214	1214	1	C	G	32	SNP	32	1	1		CCGTATTTTATTTGGTCTATCAAAGAACAAGTTGGCTCCTA	TCA	1
rad54_108	rad54Δ	CAN1	374	374	1	C	G	52	SNP	49	0.942	1		CCCAGTGGGCGCTCTTATATCATATTTATTTATGGGTTCTT	TCA	1
rad54_109	rad54Δ	CAN1	113	113	1	C	G	60	SNP	59	0.983	2	1287	AACACACCACAGACGTGGGTCAATACCATTAAAAGATGAGA	TCA	1
rad54_109	rad54Δ	CAN1	1401	1401	1	C	G	60	SNP	59	0.983	2		TTTTTTGCATGGTTATTTATCTCAATCTCGCACATCAGATT	TCT	1
rad54_110	rad54Δ	CAN1	577	577	1	C	T	30	SNP	29	0.967	1		GTGTAGTTGGCCAAGTCATTCAATTTTGGACGTACAAAGTT	TCA	1
rad54_111	rad54Δ	CAN1	1633	1633	1	C	T	34	SNP	34	1	1		TAGCTGTTTGGATCTTATTTCAATGCATATTCAGATGCAGA	TCA	1
rad54_112	rad54Δ	CAN1	969	970	1	A	DEL	8	Deletion	7	0.875	1		GTTCCAAGAGCCATCAAAAAAGTTGTTTTCCGTATCTTAAC	AAG	0
rad54_113	rad54Δ	CAN1	11	11	1	C	G	21	SNP	20	0.952	1		ATGACAAATTCAAAAGAAGACGCCGACATAG	TCA	1
rad54_114	rad54Δ	CAN1	1175	1175	1	C	G	25	SNP	24	0.96	1		CATTATTTCTGCCGCAAATTCAAATATTTACGTTGGTTCCC	TCA	1
rad54_115	rad54Δ	CAN1	1392	1392	1	G	A	24	SNP	24	1	1		GTTGCAGGCTTTTTTGCATGGTTATTTATCTCAATCTCGCA	GGT	0
rad54_116	rad54Δ	CAN1	892	892	1	C	T	28	SNP	27	0.964	1		TTAACGCTGCCTTCACATTTCAAGGTACTGAACTAGTTGGT	TCA	1
rad54_117	rad54Δ	CAN1	1611	1611	1	C	T	15	SNP	14	0.933	2	21	TATATCTCTGTTTTCCTGTTCTTAGCTGTTTGGATCTTATT	TCT	1
rad54_117	rad54Δ	CAN1	1633	1633	1	C	T	15	SNP	14	0.933	2		TAGCTGTTTGGATCTTATTTCAATGCATATTCAGATGCAGA	TCA	1
rad54_118	rad54Δ	CAN1	626	626	1	INS	T	26	Insertion	22	0.846	1		GCATGGATTAGTATTTTTTGGGTAATTATCACAATAATGA		0
rad54_119	rad54Δ	CAN1	470	470	1	C	G	13	SNP	13	1	1		ATCCTCTTTCACAGTGTTCTCACAAAGATTCCTTTCTCCAG	TCA	1
rad54_121	rad54Δ	CAN1	625	626	1	T	DEL	23	Deletion	21	0.913	1		CGGCATGGATTAGTATTTTTTGGGTAATTATCACAATAATG	TTG	0
rad54_122	rad54Δ	CAN1	789	789	1	G	A	5	SNP	2	0.4	1		CCAGTTGGATTCCGTTATTGGAGAAACCCAGGTGCCTGGGG	GGA	1
rad54_15	rad54Δ	CAN1	611	611	1	G	A	7	SNP	4	0.571	1		CAAAGTTCCACTGGCGGCATGGATTAGTATTTTTTGGGTAA	TGG	0
rad54_17	rad54Δ	CAN1	1163	1163	1	C	T	4	SNP	2	0.5	1		TATCTTAACAACCATTATTTCTGCCGCAAATTCAAATATTT	TCT	1
rad54_19	rad54Δ	CAN1	1175	1175	1	C	G	13	SNP	10	0.769	1		CATTATTTCTGCCGCAAATTCAAATATTTACGTTGGTTCCC	TCA	1
rad54_20	rad54Δ	CAN1	1214	1214	1	C	T	5	SNP	3	0.6	1		CCGTATTTTATTTGGTCTATCAAAGAACAAGTTGGCTCCTA	TCA	1
rad54_21	rad54Δ	CAN1	1409	1409	1	C	G	9	SNP	6	0.667	1		ATGGTTATTTATCTCAATCTCGCACATCAGATTTATGCAAG	TCG	1
rad54_22	rad54Δ	CAN1	470	470	1	C	G	4	SNP	2	0.5	1		ATCCTCTTTCACAGTGTTCTCACAAAGATTCCTTTCTCCAG	TCA	1
rad54_23	rad54Δ	CAN1	1175	1175	1	C	G	10	SNP	9	0.9	1		CATTATTTCTGCCGCAAATTCAAATATTTACGTTGGTTCCC	TCA	1
rad54_24	rad54Δ	CAN1	11	11	1	C	G	7	SNP	6	0.857	1		ATGACAAATTCAAAAGAAGACGCCGACATAG	TCA	1
rad54_27	rad54Δ	CAN1	802	802	1	G	T	2	SNP	2	1	2	830	GTTATTGGAGAAACCCAGGTGCCTGGGGTCCAGGTATAATA	TGC	0
rad54_27	rad54Δ	CAN1	1633	1633	1	C	T	2	SNP	2	1	2		TAGCTGTTTGGATCTTATTTCAATGCATATTCAGATGCAGA	TCA	1
rad54_28	rad54Δ	CAN1	1214	1214	1	C	G	3	SNP	3	1	1		CCGTATTTTATTTGGTCTATCAAAGAACAAGTTGGCTCCTA	TCA	1
rad54_29	rad54Δ	CAN1	321	321	1	INS	T	6	Insertion	6	1	2	0	CTATTGGTACAGGTCTTTTCATTGGTTTATCCACACCTCT		0
rad54_29	rad54Δ	CAN1	321	321	1	C	G	6	SNP	6	1	2		ACTATTGGTACAGGTCTTTTCATTGGTTTATCCACACCTCT	TCA	1
rad54_30	rad54Δ	CAN1	568	568	1	C	T	6	SNP	5	0.833	1		TGGAACTTAGTGTAGTTGGCCAAGTCATTCAATTTTGGACG	CCA	0
rad54_34	rad54Δ	CAN1	374	374	1	C	G	3	SNP	3	1	1		CCCAGTGGGCGCTCTTATATCATATTTATTTATGGGTTCTT	TCA	1
rad54_35	rad54Δ	CAN1	1214	1214	1	C	G	7	SNP	6	0.857	1		CCGTATTTTATTTGGTCTATCAAAGAACAAGTTGGCTCCTA	TCA	1
rad54_36	rad54Δ	CAN1	1214	1214	1	C	G	7	SNP	4	0.571	1		CCGTATTTTATTTGGTCTATCAAAGAACAAGTTGGCTCCTA	TCA	1
rad54_37	rad54Δ	CAN1	1214	1214	1	C	G	11	SNP	10	0.909	1		CCGTATTTTATTTGGTCTATCAAAGAACAAGTTGGCTCCTA	TCA	1
rad54_38	rad54Δ	CAN1	374	374	1	C	G	3	SNP	2	0.667	1		CCCAGTGGGCGCTCTTATATCATATTTATTTATGGGTTCTT	TCA	1
rad54_42	rad54Δ	CAN1	374	374	1	C	G	3	SNP	2	0.667	1		CCCAGTGGGCGCTCTTATATCATATTTATTTATGGGTTCTT	TCA	1
rad54_43	rad54Δ	CAN1	1633	1633	1	C	T	10	SNP	7	0.7	1		TAGCTGTTTGGATCTTATTTCAATGCATATTCAGATGCAGA	TCA	1
rad54_44	rad54Δ	CAN1	1634	1634	1	INS	G	4	Insertion	2	0.5	1		GCTGTTTGGATCTTATTTCAATGCATATTCAGATGCAGAT		0
rad54_45	rad54Δ	CAN1	1537	1537	1	C	T	5	SNP	4	0.8	1		TGACGATCATTATCATTATTCAAGGTTTCACGGCTTTTGCA	TCA	1
rad55_1	rad55Δ	CAN1	416	416	1	C	T	15	SNP	13	0.867	2	35	GGCATATTCTGTCACGCAGTCCTTGGGTGAAATGGCTACAT	TCC	1
rad55_1	rad55Δ	CAN1	452	452	1	C	T	15	SNP	13	0.867	2		TACATTCACCCCTGTTACATCCTCTTTCACAGTGTTCTCAC	TCC	1
rad55_101	rad55Δ	CAN1	1193	1193	1	C	T	24	SNP	23	0.958	1		TTCAAATATTTACGTTGGTTCCCGTATTTTATTTGGTCTAT	TCC	1
rad55_102	rad55Δ	CAN1	11	11	1	C	G	25	SNP	23	0.92	1		ATGACAAATTCAAAAGAAGACGCCGACATAG	TCA	1
rad55_103	rad55Δ	CAN1	374	374	1	C	A	24	SNP	22	0.917	1		CCCAGTGGGCGCTCTTATATCATATTTATTTATGGGTTCTT	TCA	1
rad55_104	rad55Δ	CAN1	939	940	1	C	DEL	17	Deletion	16	0.941	1		GCTGGTGAAGCTGCAAACCCCAGAAAATCCGTTCCAAGAGC	CCA	0
rad55_105	rad55Δ	CAN1	113	113	1	C	G	25	SNP	21	0.84	1		AACACACCACAGACGTGGGTCAATACCATTAAAAGATGAGA	TCA	1
rad55_106	rad55Δ	CAN1	585	585	1	G	A	18	SNP	16	0.889	1		GGCCAAGTCATTCAATTTTGGACGTACAAAGTTCCACTGGC	GGA	1
rad55_107	rad55Δ	CAN1	901	901	1	G	A	11	SNP	10	0.909	1		CCTTCACATTTCAAGGTACTGAACTAGTTGGTATCACTGCT	TGA	1
rad55_108	rad55Δ	CAN1	1537	1537	1	C	T	14	SNP	13	0.929	2	188	TGACGATCATTATCATTATTCAAGGTTTCACGGCTTTTGCA	TCA	1
rad55_108	rad55Δ	CAN1	1726	1726	1	C	G	14	SNP	13	0.929	2		AGGCAATTGTATGGGAAGATCATGAACCAAAGACTTTTTGG	TCA	1
rad55_110	rad55Δ	CAN1	1214	1214	1	C	G	21	SNP	18	0.857	1		CCGTATTTTATTTGGTCTATCAAAGAACAAGTTGGCTCCTA	TCA	1
rad55_111	rad55Δ	CAN1	113	113	1	C	G	9	SNP	9	1	1		AACACACCACAGACGTGGGTCAATACCATTAAAAGATGAGA	TCA	1
rad55_112	rad55Δ	CAN1	113	113	1	C	G	21	SNP	21	1	1		AACACACCACAGACGTGGGTCAATACCATTAAAAGATGAGA	TCA	1
rad55_113	rad55Δ	CAN1	452	452	1	C	T	15	SNP	15	1	1		TACATTCACCCCTGTTACATCCTCTTTCACAGTGTTCTCAC	TCC	1
rad55_114	rad55Δ	CAN1	1175	1175	1	C	G	9	SNP	9	1	1		CATTATTTCTGCCGCAAATTCAAATATTTACGTTGGTTCCC	TCA	1
rad55_115	rad55Δ	CAN1	978	978	1	INS	T	22	Insertion	20	0.909	2	0	GCCATCAAAAAAGTTGTTTTCCGTATCTTAACCTTCTACA		0
rad55_115	rad55Δ	CAN1	978	978	1	C	G	22	SNP	20	0.909	2		GCCATCAAAAAAGTTGTTTTCCGTATCTTAACCTTCTACAT	TCC	1
rad55_116	rad55Δ	CAN1	113	113	1	C	G	17	SNP	17	1	1		AACACACCACAGACGTGGGTCAATACCATTAAAAGATGAGA	TCA	1
rad55_117	rad55Δ	CAN1	1214	1214	1	C	T	15	SNP	15	1	1		CCGTATTTTATTTGGTCTATCAAAGAACAAGTTGGCTCCTA	TCA	1
rad55_118	rad55Δ	CAN1	1124	1124	1	C	G	37	SNP	34	0.919	2	143	CTCTGGTACAAAGGTTTTGCCACATATCTTCAACGCTGTTA	CCA	0
rad55_118	rad55Δ	CAN1	1268	1268	1	C	G	37	SNP	34	0.919	2		GACCACCAAAGGTGGTGTTCCATACATTGCAGTTTTCGTTA	CCA	0
rad55_119	rad55Δ	CAN1	424	424	1	G	A	17	SNP	13	0.765	1		CTGTCACGCAGTCCTTGGGTGAAATGGCTACATTCACCCCT	TGA	1
rad55_120	rad55Δ	CAN1	113	113	1	C	G	18	SNP	17	0.944	1		AACACACCACAGACGTGGGTCAATACCATTAAAAGATGAGA	TCA	1
rad55_121	rad55Δ	CAN1	1403	1403	1	C	G	27	SNP	25	0.926	1		TTTTGCATGGTTATTTATCTCAATCTCGCACATCAGATTTA	TCA	1
rad55_122	rad55Δ	CAN1	374	374	1	C	G	34	SNP	34	1	1		CCCAGTGGGCGCTCTTATATCATATTTATTTATGGGTTCTT	TCA	1
rad55_123	rad55Δ	CAN1	374	374	1	C	G	25	SNP	23	0.92	1		CCCAGTGGGCGCTCTTATATCATATTTATTTATGGGTTCTT	TCA	1
rad55_124	rad55Δ	CAN1	527	527	1	C	T	22	SNP	19	0.864	1		TGGTTACATGTATTGGTTTTCTTGGGCAATCACTTTTGCCC	TCT	1
rad55_14	rad55Δ	CAN1	11	11	1	C	G	3	SNP	3	1	1		ATGACAAATTCAAAAGAAGACGCCGACATAG	TCA	1
rad55_15	rad55Δ	CAN1	679	679	1	G	A	9	SNP	8	0.889	1		TCAAATATTACGGTGAATTCGAGTTCTGGGTCGCTTCCATC	CGA	1
rad55_16	rad55Δ	CAN1	1195	1195	1	C	T	7	SNP	4	0.571	1		CAAATATTTACGTTGGTTCCCGTATTTTATTTGGTCTATCA	CCG	0
rad55_17	rad55Δ	CAN1	1175	1175	1	C	G	11	SNP	6	0.545	1		CATTATTTCTGCCGCAAATTCAAATATTTACGTTGGTTCCC	TCA	1
rad55_18	rad55Δ	CAN1	11	11	1	C	G	5	SNP	5	1	1		ATGACAAATTCAAAAGAAGACGCCGACATAG	TCA	1
rad55_19	rad55Δ	CAN1	1073	1074	1	C	DEL	10	Deletion	9	0.9	1		ACAATCTACTTCCTACGTTTCTACTTCTCCCTTTATTATTG	TCT	1
rad55_2	rad55Δ	CAN1	892	892	1	C	T	12	SNP	10	0.833	1		TTAACGCTGCCTTCACATTTCAAGGTACTGAACTAGTTGGT	TCA	1
rad55_21	rad55Δ	CAN1	1214	1214	1	C	G	10	SNP	8	0.8	1		CCGTATTTTATTTGGTCTATCAAAGAACAAGTTGGCTCCTA	TCA	1
rad55_22	rad55Δ	CAN1	568	568	1	C	A	4	SNP	3	0.75	2	4	TGGAACTTAGTGTAGTTGGCCAAGTCATTCAATTTTGGACG	CCA	0
rad55_22	rad55Δ	CAN1	573	573	1	C	T	4	SNP	3	0.75	2		CTTAGTGTAGTTGGCCAAGTCATTCAATTTTGGACGTACAA	TCA	1
rad55_23	rad55Δ	CAN1	455	455	1	C	T	6	SNP	4	0.667	1		ATTCACCCCTGTTACATCCTCTTTCACAGTGTTCTCACAAA	TCT	1
rad55_28	rad55Δ	CAN1	113	113	1	C	G	8	SNP	3	0.375	1		AACACACCACAGACGTGGGTCAATACCATTAAAAGATGAGA	TCA	1
rad55_29	rad55Δ	CAN1	89	89	1	C	A	6	SNP	6	1	1		CTTTCACGACGTTGAAGCTTCACAAACACACCACAGACGTG	TCA	1
rad55_3	rad55Δ	CAN1	374	374	1	C	G	7	SNP	6	0.857	1		CCCAGTGGGCGCTCTTATATCATATTTATTTATGGGTTCTT	TCA	1
rad55_30	rad55Δ	CAN1	521	521	1	G	A	13	SNP	12	0.923	1		GGCCAATGGTTACATGTATTGGTTTTCTTGGGCAATCACTT	TGG	0
rad55_37	rad55Δ	CAN1	1214	1214	1	C	T	12	SNP	5	0.417	1		CCGTATTTTATTTGGTCTATCAAAGAACAAGTTGGCTCCTA	TCA	1
rad55_38	rad55Δ	CAN1	1214	1214	1	C	G	7	SNP	3	0.429	1		CCGTATTTTATTTGGTCTATCAAAGAACAAGTTGGCTCCTA	TCA	1
rad55_39	rad55Δ	CAN1	1163	1163	1	C	T	3	SNP	3	1	1		TATCTTAACAACCATTATTTCTGCCGCAAATTCAAATATTT	TCT	1
rad55_4	rad55Δ	CAN1	724	724	1	INS	T	6	Insertion	3	0.5	2	0	TTTAGCCATTATCGGGTTTCTAATATACTGTTTTTGTATG		0
rad55_4	rad55Δ	CAN1	724	724	1	C	G	6	SNP	3	0.5	2		TTTTAGCCATTATCGGGTTTCTAATATACTGTTTTTGTATG	TCT	1
rad55_40	rad55Δ	CAN1	1244	1244	1	C	G	7	SNP	2	0.286	1		GTTGGCTCCTAAATTCCTGTCAAGGACCACCAAAGGTGGTG	TCA	1
rad55_41	rad55Δ	CAN1	374	374	1	C	G	16	SNP	11	0.688	1		CCCAGTGGGCGCTCTTATATCATATTTATTTATGGGTTCTT	TCA	1
rad55_43	rad55Δ	CAN1	1403	1403	1	C	G	8	SNP	5	0.625	1		TTTTGCATGGTTATTTATCTCAATCTCGCACATCAGATTTA	TCA	1
rad55_44	rad55Δ	CAN1	1175	1175	1	C	G	5	SNP	3	0.6	1		CATTATTTCTGCCGCAAATTCAAATATTTACGTTGGTTCCC	TCA	1
rad55_45	rad55Δ	CAN1	1633	1633	1	C	T	11	SNP	7	0.636	1		TAGCTGTTTGGATCTTATTTCAATGCATATTCAGATGCAGA	TCA	1
rad55_46	rad55Δ	CAN1	332	332	1	C	T	7	SNP	4	0.571	1		AGGTCTTTTCATTGGTTTATCCACACCTCTGACCAACGCCG	TCC	1
rad55_47	rad55Δ	CAN1	1347	1348	1	C	DEL	5	Deletion	5	1	1		ACTGGTGGTGACAAAGTTTTCGAATGGCTATTAAATATCAC	TCG	1
rad55_5	rad55Δ	CAN1	452	452	1	C	T	13	SNP	9	0.692	1		TACATTCACCCCTGTTACATCCTCTTTCACAGTGTTCTCAC	TCC	1
rad55_6	rad55Δ	CAN1	1193	1193	1	C	T	8	SNP	6	0.75	1		TTCAAATATTTACGTTGGTTCCCGTATTTTATTTGGTCTAT	TCC	1
rad55_7	rad55Δ	CAN1	1244	1244	1	C	G	2	SNP	2	1	1		GTTGGCTCCTAAATTCCTGTCAAGGACCACCAAAGGTGGTG	TCA	1
rad55_8	rad55Δ	CAN1	892	892	1	C	T	8	SNP	4	0.5	1		TTAACGCTGCCTTCACATTTCAAGGTACTGAACTAGTTGGT	TCA	1
rgi2_1	rgi2Δ	CAN1	455	455	1	C	T	6	SNP	6	1	1		ATTCACCCCTGTTACATCCTCTTTCACAGTGTTCTCACAAA	TCT	1
rgi2_10	rgi2Δ	CAN1	979	979	1	C	T	21	SNP	20	0.952	1		CCATCAAAAAAGTTGTTTTCCGTATCTTAACCTTCTACATT	CCG	0
rgi2_11	rgi2Δ	CAN1	1214	1214	1	C	T	24	SNP	22	0.917	1		CCGTATTTTATTTGGTCTATCAAAGAACAAGTTGGCTCCTA	TCA	1
rgi2_12	rgi2Δ	CAN1	1537	1537	1	C	T	27	SNP	24	0.889	1		TGACGATCATTATCATTATTCAAGGTTTCACGGCTTTTGCA	TCA	1
rgi2_13	rgi2Δ	CAN1	1163	1163	1	C	T	27	SNP	27	1	1		TATCTTAACAACCATTATTTCTGCCGCAAATTCAAATATTT	TCT	1
rgi2_14	rgi2Δ	CAN1	1409	1409	1	C	G	20	SNP	16	0.8	1		ATGGTTATTTATCTCAATCTCGCACATCAGATTTATGCAAG	TCG	1
rgi2_15	rgi2Δ	CAN1	670	670	1	G	A	25	SNP	23	0.92	1		TGTTCCCTGTCAAATATTACGGTGAATTCGAGTTCTGGGTC	CGG	0
rgi2_16	rgi2Δ	CAN1	1537	1537	1	C	T	19	SNP	18	0.947	1		TGACGATCATTATCATTATTCAAGGTTTCACGGCTTTTGCA	TCA	1
rgi2_17	rgi2Δ	CAN1	1175	1175	1	C	T	33	SNP	28	0.848	1		CATTATTTCTGCCGCAAATTCAAATATTTACGTTGGTTCCC	TCA	1
rgi2_18	rgi2Δ	CAN1	789	789	1	G	A	25	SNP	23	0.92	1		CCAGTTGGATTCCGTTATTGGAGAAACCCAGGTGCCTGGGG	GGA	1
rgi2_19	rgi2Δ	CAN1	452	452	1	C	T	21	SNP	20	0.952	1		TACATTCACCCCTGTTACATCCTCTTTCACAGTGTTCTCAC	TCC	1
rgi2_2	rgi2Δ	CAN1	1163	1163	1	C	T	9	SNP	9	1	1		TATCTTAACAACCATTATTTCTGCCGCAAATTCAAATATTT	TCT	1
rgi2_20	rgi2Δ	CAN1	577	577	1	C	T	31	SNP	26	0.839	1		GTGTAGTTGGCCAAGTCATTCAATTTTGGACGTACAAAGTT	TCA	1
rgi2_21	rgi2Δ	CAN1	1633	1633	1	C	T	14	SNP	14	1	1		TAGCTGTTTGGATCTTATTTCAATGCATATTCAGATGCAGA	TCA	1
rgi2_22	rgi2Δ	CAN1	424	424	1	G	A	27	SNP	25	0.926	1		CTGTCACGCAGTCCTTGGGTGAAATGGCTACATTCACCCCT	TGA	1
rgi2_23	rgi2Δ	CAN1	585	585	1	G	A	15	SNP	15	1	1		GGCCAAGTCATTCAATTTTGGACGTACAAAGTTCCACTGGC	GGA	1
rgi2_24	rgi2Δ	CAN1	424	424	1	G	A	26	SNP	24	0.923	1		CTGTCACGCAGTCCTTGGGTGAAATGGCTACATTCACCCCT	TGA	1
rgi2_25	rgi2Δ	CAN1	857	857	1	G	A	29	SNP	26	0.897	1		CGAAGGGAGGTTCTTAGGTTGGGTTTCCTCTTTGATTAACG	TGG	0
rgi2_26	rgi2Δ	CAN1	1214	1214	1	C	T	32	SNP	31	0.969	1		CCGTATTTTATTTGGTCTATCAAAGAACAAGTTGGCTCCTA	TCA	1
rgi2_27	rgi2Δ	CAN1	925	925	1	G	A	25	SNP	20	0.8	1		TAGTTGGTATCACTGCTGGTGAAGCTGCAAACCCCAGAAAA	TGA	1
rgi2_28	rgi2Δ	CAN1	1193	1193	1	C	T	33	SNP	31	0.939	1		TTCAAATATTTACGTTGGTTCCCGTATTTTATTTGGTCTAT	TCC	1
rgi2_29	rgi2Δ	CAN1	1175	1175	1	C	G	21	SNP	21	1	2	38	CATTATTTCTGCCGCAAATTCAAATATTTACGTTGGTTCCC	TCA	1
rgi2_29	rgi2Δ	CAN1	1214	1214	1	C	G	21	SNP	21	1	2		CCGTATTTTATTTGGTCTATCAAAGAACAAGTTGGCTCCTA	TCA	1
rgi2_3	rgi2Δ	CAN1	1163	1163	1	C	T	11	SNP	11	1	1		TATCTTAACAACCATTATTTCTGCCGCAAATTCAAATATTT	TCT	1
rgi2_30	rgi2Δ	CAN1	1537	1537	1	C	T	21	SNP	21	1	1		TGACGATCATTATCATTATTCAAGGTTTCACGGCTTTTGCA	TCA	1
rgi2_31	rgi2Δ	CAN1	1193	1193	1	C	T	16	SNP	15	0.938	1		TTCAAATATTTACGTTGGTTCCCGTATTTTATTTGGTCTAT	TCC	1
rgi2_32	rgi2Δ	CAN1	807	807	1	G	A	26	SNP	26	1	1		TGGAGAAACCCAGGTGCCTGGGGTCCAGGTATAATATCTAA	GGG	0
rgi2_33	rgi2Δ	CAN1	1214	1214	1	C	T	15	SNP	14	0.933	1		CCGTATTTTATTTGGTCTATCAAAGAACAAGTTGGCTCCTA	TCA	1
rgi2_34	rgi2Δ	CAN1	789	789	1	G	A	23	SNP	17	0.739	1		CCAGTTGGATTCCGTTATTGGAGAAACCCAGGTGCCTGGGG	GGA	1
rgi2_35	rgi2Δ	CAN1	577	577	1	C	T	23	SNP	23	1	1		GTGTAGTTGGCCAAGTCATTCAATTTTGGACGTACAAAGTT	TCA	1
rgi2_36	rgi2Δ	CAN1	1163	1163	1	C	T	16	SNP	16	1	1		TATCTTAACAACCATTATTTCTGCCGCAAATTCAAATATTT	TCT	1
rgi2_37	rgi2Δ	CAN1	1537	1537	1	C	T	29	SNP	27	0.931	1		TGACGATCATTATCATTATTCAAGGTTTCACGGCTTTTGCA	TCA	1
rgi2_38	rgi2Δ	CAN1	1214	1214	1	C	T	32	SNP	31	0.969	1		CCGTATTTTATTTGGTCTATCAAAGAACAAGTTGGCTCCTA	TCA	1
rgi2_39	rgi2Δ	CAN1	612	612	1	G	A	15	SNP	14	0.933	1		AAAGTTCCACTGGCGGCATGGATTAGTATTTTTTGGGTAAT	GGA	1
rgi2_4	rgi2Δ	CAN1	679	679	1	G	A	16	SNP	9	0.563	1		TCAAATATTACGGTGAATTCGAGTTCTGGGTCGCTTCCATC	CGA	1
rgi2_40	rgi2Δ	CAN1	626	626	1	G	A	32	SNP	31	0.969	1		GGCATGGATTAGTATTTTTTGGGTAATTATCACAATAATGA	TGG	0
rgi2_41	rgi2Δ	CAN1	979	979	1	C	T	25	SNP	23	0.92	1		CCATCAAAAAAGTTGTTTTCCGTATCTTAACCTTCTACATT	CCG	0
rgi2_42	rgi2Δ	CAN1	925	925	1	G	A	25	SNP	24	0.96	1		TAGTTGGTATCACTGCTGGTGAAGCTGCAAACCCCAGAAAA	TGA	1
rgi2_43	rgi2Δ	CAN1	1633	1633	1	C	T	38	SNP	34	0.895	1		TAGCTGTTTGGATCTTATTTCAATGCATATTCAGATGCAGA	TCA	1
rgi2_44	rgi2Δ	CAN1	424	424	1	G	A	27	SNP	26	0.963	1		CTGTCACGCAGTCCTTGGGTGAAATGGCTACATTCACCCCT	TGA	1
rgi2_45	rgi2Δ	CAN1	577	577	1	C	T	29	SNP	26	0.897	1		GTGTAGTTGGCCAAGTCATTCAATTTTGGACGTACAAAGTT	TCA	1
rgi2_46	rgi2Δ	CAN1	612	612	1	G	A	25	SNP	24	0.96	1		AAAGTTCCACTGGCGGCATGGATTAGTATTTTTTGGGTAAT	GGA	1
rgi2_47	rgi2Δ	CAN1	527	527	1	C	A	32	SNP	31	0.969	1		TGGTTACATGTATTGGTTTTCTTGGGCAATCACTTTTGCCC	TCT	1
rgi2_5	rgi2Δ	CAN1	1623	1623	1	G	A	21	SNP	20	0.952	1		TTCCTGTTCTTAGCTGTTTGGATCTTATTTCAATGCATATT	GGA	1
rgi2_6	rgi2Δ	CAN1	1537	1537	1	C	T	29	SNP	27	0.931	1		TGACGATCATTATCATTATTCAAGGTTTCACGGCTTTTGCA	TCA	1
rgi2_7	rgi2Δ	CAN1	892	892	1	C	T	18	SNP	14	0.778	1		TTAACGCTGCCTTCACATTTCAAGGTACTGAACTAGTTGGT	TCA	1
rgi2_8	rgi2Δ	CAN1	1193	1193	1	C	T	18	SNP	18	1	1		TTCAAATATTTACGTTGGTTCCCGTATTTTATTTGGTCTAT	TCC	1
rgi2_9	rgi2Δ	CAN1	352	352	1	G	A	35	SNP	32	0.914	1		CCACACCTCTGACCAACGCCGGCCCAGTGGGCGCTCTTATA	CGG	0
rtt101_12	rtt101Δ	CAN1	1403	1403	1	C	G	12	SNP	7	0.583	1		TTTTGCATGGTTATTTATCTCAATCTCGCACATCAGATTTA	TCA	1
rtt101_13	rtt101Δ	CAN1	1175	1175	1	C	G	9	SNP	3	0.333	1		CATTATTTCTGCCGCAAATTCAAATATTTACGTTGGTTCCC	TCA	1
rtt101_14	rtt101Δ	CAN1	1626	1626	1	C	G	6	SNP	2	0.333	1		CTGTTCTTAGCTGTTTGGATCTTATTTCAATGCATATTCAG	TCT	1
rtt101_19	rtt101Δ	CAN1	1163	1164	1	C	DEL	48	Deletion	46	0.958	1		TATCTTAACAACCATTATTTCTGCCGCAAATTCAAATATTT	TCT	1
rtt101_2	rtt101Δ	CAN1	113	113	1	C	G	11	SNP	3	0.273	1		AACACACCACAGACGTGGGTCAATACCATTAAAAGATGAGA	TCA	1
rtt101_20	rtt101Δ	CAN1	550	550	1	G	A	11	SNP	4	0.364	1		GGGCAATCACTTTTGCCCTGGAACTTAGTGTAGTTGGCCAA	GGA	1
rtt101_21	rtt101Δ	CAN1	979	979	1	C	T	15	SNP	8	0.533	1		CCATCAAAAAAGTTGTTTTCCGTATCTTAACCTTCTACATT	CCG	0
rtt101_22	rtt101Δ	CAN1	1214	1214	1	C	G	6	SNP	4	0.667	1		CCGTATTTTATTTGGTCTATCAAAGAACAAGTTGGCTCCTA	TCA	1
rtt101_26	rtt101Δ	CAN1	1403	1403	1	C	G	7	SNP	4	0.571	1		TTTTGCATGGTTATTTATCTCAATCTCGCACATCAGATTTA	TCA	1
rtt101_27	rtt101Δ	CAN1	356	356	1	C	T	7	SNP	3	0.429	1		ACCTCTGACCAACGCCGGCCCAGTGGGCGCTCTTATATCAT	CCA	0
rtt101_28	rtt101Δ	CAN1	1678	1678	1	G	C	8	SNP	2	0.25	1		TTTGGAAGATTGGAGATGTCGACATCGATTCCGATAGAAGA	CGA	1
rtt101_29	rtt101Δ	CAN1	1466	1466	1	C	T	10	SNP	3	0.3	1		CATCTCTCGTGACGAGTTACCATTTAAAGCTAAATTAATGC	CCA	0
rtt101_3	rtt101Δ	CAN1	298	298	1	G	C	7	SNP	2	0.286	1		TTGGTATGATTGCCCTTGGTGGTACTATTGGTACAGGTCTT	TGG	0
rtt101_31	rtt101Δ	CAN1	1214	1214	1	C	G	2	SNP	2	1	1		CCGTATTTTATTTGGTCTATCAAAGAACAAGTTGGCTCCTA	TCA	1
rtt101_33	rtt101Δ	CAN1	1244	1244	1	C	G	13	SNP	6	0.462	1		GTTGGCTCCTAAATTCCTGTCAAGGACCACCAAAGGTGGTG	TCA	1
rtt101_34	rtt101Δ	CAN1	1214	1214	1	C	G	7	SNP	3	0.429	1		CCGTATTTTATTTGGTCTATCAAAGAACAAGTTGGCTCCTA	TCA	1
rtt101_36	rtt101Δ	CAN1	11	11	1	C	G	11	SNP	3	0.273	1		ATGACAAATTCAAAAGAAGACGCCGACATAG	TCA	1
rtt101_37	rtt101Δ	CAN1	724	725	1	C	DEL	17	Deletion	8	0.471	1		TTTTAGCCATTATCGGGTTTCTAATATACTGTTTTTGTATG	TCT	1
rtt101_39	rtt101Δ	CAN1	1214	1214	1	C	G	12	SNP	6	0.5	1		CCGTATTTTATTTGGTCTATCAAAGAACAAGTTGGCTCCTA	TCA	1
rtt101_42	rtt101Δ	CAN1	1403	1403	1	C	G	8	SNP	4	0.5	1		TTTTGCATGGTTATTTATCTCAATCTCGCACATCAGATTTA	TCA	1
rtt101_5	rtt101Δ	CAN1	1175	1175	1	C	G	5	SNP	3	0.6	1		CATTATTTCTGCCGCAAATTCAAATATTTACGTTGGTTCCC	TCA	1
rtt101_6	rtt101Δ	CAN1	1214	1214	1	C	G	6	SNP	2	0.333	1		CCGTATTTTATTTGGTCTATCAAAGAACAAGTTGGCTCCTA	TCA	1
rtt101_7	rtt101Δ	CAN1	1214	1214	1	C	G	9	SNP	6	0.667	1		CCGTATTTTATTTGGTCTATCAAAGAACAAGTTGGCTCCTA	TCA	1
rtt101_8	rtt101Δ	CAN1	1214	1214	1	C	G	6	SNP	2	0.333	1		CCGTATTTTATTTGGTCTATCAAAGAACAAGTTGGCTCCTA	TCA	1
rtt107_1	rtt107Δ	CAN1	455	455	1	C	T	4	SNP	4	1	1		ATTCACCCCTGTTACATCCTCTTTCACAGTGTTCTCACAAA	TCT	1
rtt107_10	rtt107Δ	CAN1	1537	1537	1	C	A	4	SNP	4	1	1		TGACGATCATTATCATTATTCAAGGTTTCACGGCTTTTGCA	TCA	1
rtt107_11	rtt107Δ	CAN1	452	452	1	C	T	5	SNP	5	1	1		TACATTCACCCCTGTTACATCCTCTTTCACAGTGTTCTCAC	TCC	1
rtt107_12	rtt107Δ	CAN1	686	686	1	G	A	3	SNP	3	1	1		TTACGGTGAATTCGAGTTCTGGGTCGCTTCCATCAAAGTTT	TGG	0
rtt107_13	rtt107Δ	CAN1	424	424	1	G	A	16	SNP	16	1	1		CTGTCACGCAGTCCTTGGGTGAAATGGCTACATTCACCCCT	TGA	1
rtt107_14	rtt107Δ	CAN1	577	577	1	C	T	7	SNP	7	1	2	556	GTGTAGTTGGCCAAGTCATTCAATTTTGGACGTACAAAGTT	TCA	1
rtt107_14	rtt107Δ	CAN1	1134	1134	1	C	T	7	SNP	7	1	2		AAGGTTTTGCCACATATCTTCAACGCTGTTATCTTAACAAC	TCA	1
rtt107_15	rtt107Δ	CAN1	1214	1214	1	C	G	8	SNP	8	1	1		CCGTATTTTATTTGGTCTATCAAAGAACAAGTTGGCTCCTA	TCA	1
rtt107_16	rtt107Δ	CAN1	1068	1068	1	C	A	5	SNP	5	1	1		CTAACACAATCTACTTCCTACGTTTCTACTTCTCCCTTTAT	ACG	0
rtt107_18	rtt107Δ	CAN1	1633	1633	1	C	T	5	SNP	5	1	1		TAGCTGTTTGGATCTTATTTCAATGCATATTCAGATGCAGA	TCA	1
rtt107_19	rtt107Δ	CAN1	577	577	1	C	T	11	SNP	11	1	1		GTGTAGTTGGCCAAGTCATTCAATTTTGGACGTACAAAGTT	TCA	1
rtt107_2	rtt107Δ	CAN1	979	979	1	C	T	3	SNP	3	1	1		CCATCAAAAAAGTTGTTTTCCGTATCTTAACCTTCTACATT	CCG	0
rtt107_20	rtt107Δ	CAN1	1163	1163	1	C	T	6	SNP	5	0.833	1		TATCTTAACAACCATTATTTCTGCCGCAAATTCAAATATTT	TCT	1
rtt107_21	rtt107Δ	CAN1	1214	1214	1	C	G	12	SNP	12	1	1		CCGTATTTTATTTGGTCTATCAAAGAACAAGTTGGCTCCTA	TCA	1
rtt107_22	rtt107Δ	CAN1	452	452	1	C	T	7	SNP	6	0.857	1		TACATTCACCCCTGTTACATCCTCTTTCACAGTGTTCTCAC	TCC	1
rtt107_23	rtt107Δ	CAN1	1163	1163	1	C	T	13	SNP	13	1	1		TATCTTAACAACCATTATTTCTGCCGCAAATTCAAATATTT	TCT	1
rtt107_24	rtt107Δ	CAN1	679	679	1	G	A	3	SNP	3	1	1		TCAAATATTACGGTGAATTCGAGTTCTGGGTCGCTTCCATC	CGA	1
rtt107_25	rtt107Δ	CAN1	1623	1623	1	G	A	15	SNP	15	1	1		TTCCTGTTCTTAGCTGTTTGGATCTTATTTCAATGCATATT	GGA	1
rtt107_26	rtt107Δ	CAN1	332	332	1	C	G	8	SNP	8	1	2	881	AGGTCTTTTCATTGGTTTATCCACACCTCTGACCAACGCCG	TCC	1
rtt107_26	rtt107Δ	CAN1	1214	1214	1	C	T	8	SNP	8	1	2		CCGTATTTTATTTGGTCTATCAAAGAACAAGTTGGCTCCTA	TCA	1
rtt107_27	rtt107Δ	CAN1	1163	1163	1	C	T	13	SNP	13	1	1		TATCTTAACAACCATTATTTCTGCCGCAAATTCAAATATTT	TCT	1
rtt107_28	rtt107Δ	CAN1	1633	1633	1	C	T	5	SNP	5	1	1		TAGCTGTTTGGATCTTATTTCAATGCATATTCAGATGCAGA	TCA	1
rtt107_29	rtt107Δ	CAN1	611	611	1	G	A	9	SNP	9	1	1		CAAAGTTCCACTGGCGGCATGGATTAGTATTTTTTGGGTAA	TGG	0
rtt107_3	rtt107Δ	CAN1	1244	1244	1	C	G	12	SNP	11	0.917	1		GTTGGCTCCTAAATTCCTGTCAAGGACCACCAAAGGTGGTG	TCA	1
rtt107_30	rtt107Δ	CAN1	1175	1175	1	C	T	5	SNP	5	1	1		CATTATTTCTGCCGCAAATTCAAATATTTACGTTGGTTCCC	TCA	1
rtt107_31	rtt107Δ	CAN1	1193	1193	1	C	T	11	SNP	10	0.909	1		TTCAAATATTTACGTTGGTTCCCGTATTTTATTTGGTCTAT	TCC	1
rtt107_32	rtt107Δ	CAN1	455	455	1	C	T	7	SNP	7	1	1		ATTCACCCCTGTTACATCCTCTTTCACAGTGTTCTCACAAA	TCT	1
rtt107_33	rtt107Δ	CAN1	1633	1633	1	C	T	6	SNP	5	0.833	1		TAGCTGTTTGGATCTTATTTCAATGCATATTCAGATGCAGA	TCA	1
rtt107_34	rtt107Δ	CAN1	892	892	1	C	T	11	SNP	11	1	1		TTAACGCTGCCTTCACATTTCAAGGTACTGAACTAGTTGGT	TCA	1
rtt107_35	rtt107Δ	CAN1	1403	1403	1	C	G	15	SNP	14	0.933	1		TTTTGCATGGTTATTTATCTCAATCTCGCACATCAGATTTA	TCA	1
rtt107_36	rtt107Δ	CAN1	577	577	1	C	T	12	SNP	12	1	1		GTGTAGTTGGCCAAGTCATTCAATTTTGGACGTACAAAGTT	TCA	1
rtt107_37	rtt107Δ	CAN1	1623	1623	1	G	A	10	SNP	9	0.9	1		TTCCTGTTCTTAGCTGTTTGGATCTTATTTCAATGCATATT	GGA	1
rtt107_38	rtt107Δ	CAN1	1633	1633	1	C	T	5	SNP	5	1	1		TAGCTGTTTGGATCTTATTTCAATGCATATTCAGATGCAGA	TCA	1
rtt107_39	rtt107Δ	CAN1	1214	1214	1	C	T	11	SNP	11	1	1		CCGTATTTTATTTGGTCTATCAAAGAACAAGTTGGCTCCTA	TCA	1
rtt107_4	rtt107Δ	CAN1	1347	1348	1	C	DEL	11	Deletion	11	1	1		ACTGGTGGTGACAAAGTTTTCGAATGGCTATTAAATATCAC	TCG	1
rtt107_40	rtt107Δ	CAN1	1403	1403	1	C	G	5	SNP	4	0.8	1		TTTTGCATGGTTATTTATCTCAATCTCGCACATCAGATTTA	TCA	1
rtt107_41	rtt107Δ	CAN1	1537	1537	1	C	T	5	SNP	5	1	1		TGACGATCATTATCATTATTCAAGGTTTCACGGCTTTTGCA	TCA	1
rtt107_42	rtt107Δ	CAN1	577	577	1	C	T	15	SNP	15	1	1		GTGTAGTTGGCCAAGTCATTCAATTTTGGACGTACAAAGTT	TCA	1
rtt107_43	rtt107Δ	CAN1	1633	1633	1	C	T	18	SNP	16	0.889	1		TAGCTGTTTGGATCTTATTTCAATGCATATTCAGATGCAGA	TCA	1
rtt107_44	rtt107Δ	CAN1	452	452	1	C	T	17	SNP	16	0.941	1		TACATTCACCCCTGTTACATCCTCTTTCACAGTGTTCTCAC	TCC	1
rtt107_45	rtt107Δ	CAN1	455	455	1	C	T	5	SNP	5	1	3	215	ATTCACCCCTGTTACATCCTCTTTCACAGTGTTCTCACAAA	TCT	1
rtt107_45	rtt107Δ	CAN1	671	671	1	G	A	5	SNP	5	1	3	12	GTTCCCTGTCAAATATTACGGTGAATTCGAGTTCTGGGTCG	GGT	0
rtt107_45	rtt107Δ	CAN1	684	684	1	C	G	5	SNP	5	1	3		TATTACGGTGAATTCGAGTTCTGGGTCGCTTCCATCAAAGT	TCT	1
rtt107_46	rtt107Δ	CAN1	1537	1537	1	C	T	12	SNP	12	1	1		TGACGATCATTATCATTATTCAAGGTTTCACGGCTTTTGCA	TCA	1
rtt107_47	rtt107Δ	CAN1	1214	1214	1	C	G	11	SNP	11	1	1		CCGTATTTTATTTGGTCTATCAAAGAACAAGTTGGCTCCTA	TCA	1
rtt107_48	rtt107Δ	CAN1	1403	1403	1	C	G	12	SNP	12	1	1		TTTTGCATGGTTATTTATCTCAATCTCGCACATCAGATTTA	TCA	1
rtt107_5	rtt107Δ	CAN1	979	979	1	C	T	9	SNP	9	1	1		CCATCAAAAAAGTTGTTTTCCGTATCTTAACCTTCTACATT	CCG	0
rtt107_6	rtt107Δ	CAN1	1214	1214	1	C	G	6	SNP	5	0.833	1		CCGTATTTTATTTGGTCTATCAAAGAACAAGTTGGCTCCTA	TCA	1
rtt107_7	rtt107Δ	CAN1	374	374	1	C	G	2	SNP	2	1	1		CCCAGTGGGCGCTCTTATATCATATTTATTTATGGGTTCTT	TCA	1
rtt107_8	rtt107Δ	CAN1	1537	1537	1	C	T	7	SNP	7	1	1		TGACGATCATTATCATTATTCAAGGTTTCACGGCTTTTGCA	TCA	1
rtt107_9	rtt107Δ	CAN1	1537	1537	1	C	T	12	SNP	11	0.917	1		TGACGATCATTATCATTATTCAAGGTTTCACGGCTTTTGCA	TCA	1
rtt109_1	rtt109Δ	CAN1	1163	1163	1	C	T	27	SNP	24	0.889	1		TATCTTAACAACCATTATTTCTGCCGCAAATTCAAATATTT	TCT	1
rtt109_10	rtt109Δ	CAN1	1244	1244	1	C	G	30	SNP	28	0.933	1		GTTGGCTCCTAAATTCCTGTCAAGGACCACCAAAGGTGGTG	TCA	1
rtt109_11	rtt109Δ	CAN1	1244	1244	1	C	G	68	SNP	66	0.971	1		GTTGGCTCCTAAATTCCTGTCAAGGACCACCAAAGGTGGTG	TCA	1
rtt109_12	rtt109Δ	CAN1	452	452	1	C	T	51	SNP	50	0.98	1		TACATTCACCCCTGTTACATCCTCTTTCACAGTGTTCTCAC	TCC	1
rtt109_13	rtt109Δ	CAN1	1214	1214	1	C	G	50	SNP	49	0.98	1		CCGTATTTTATTTGGTCTATCAAAGAACAAGTTGGCTCCTA	TCA	1
rtt109_14	rtt109Δ	CAN1	1214	1214	1	C	T	8	SNP	8	1	1		CCGTATTTTATTTGGTCTATCAAAGAACAAGTTGGCTCCTA	TCA	1
rtt109_15	rtt109Δ	CAN1	1633	1633	1	C	T	29	SNP	28	0.966	1		TAGCTGTTTGGATCTTATTTCAATGCATATTCAGATGCAGA	TCA	1
rtt109_16	rtt109Δ	CAN1	452	452	1	C	T	14	SNP	14	1	1		TACATTCACCCCTGTTACATCCTCTTTCACAGTGTTCTCAC	TCC	1
rtt109_17	rtt109Δ	CAN1	1537	1537	1	C	T	14	SNP	14	1	1		TGACGATCATTATCATTATTCAAGGTTTCACGGCTTTTGCA	TCA	1
rtt109_18	rtt109Δ	CAN1	452	452	1	C	T	12	SNP	10	0.833	1		TACATTCACCCCTGTTACATCCTCTTTCACAGTGTTCTCAC	TCC	1
rtt109_19	rtt109Δ	CAN1	892	892	1	C	T	26	SNP	25	0.962	1		TTAACGCTGCCTTCACATTTCAAGGTACTGAACTAGTTGGT	TCA	1
rtt109_2	rtt109Δ	CAN1	857	857	1	G	A	53	SNP	51	0.962	1		CGAAGGGAGGTTCTTAGGTTGGGTTTCCTCTTTGATTAACG	TGG	0
rtt109_20	rtt109Δ	CAN1	771	771	1	INS	C	19	Insertion	19	1	2	1	GTGCTGGGGTTACCGGCCCAGTTGGATTCCGTTATTGGAG		0
rtt109_20	rtt109Δ	CAN1	772	772	1	G	T	19	SNP	18	0.947	2		GTGCTGGGGTTACCGGCCCAGTTGGATTCCGTTATTGGAGA	AGT	0
rtt109_21	rtt109Δ	CAN1	1633	1633	1	C	T	23	SNP	23	1	1		TAGCTGTTTGGATCTTATTTCAATGCATATTCAGATGCAGA	TCA	1
rtt109_22	rtt109Δ	CAN1	789	789	1	G	A	24	SNP	24	1	1		CCAGTTGGATTCCGTTATTGGAGAAACCCAGGTGCCTGGGG	GGA	1
rtt109_23	rtt109Δ	CAN1	979	979	1	C	G	19	SNP	17	0.895	1		CCATCAAAAAAGTTGTTTTCCGTATCTTAACCTTCTACATT	CCG	0
rtt109_24	rtt109Δ	CAN1	679	679	1	G	A	28	SNP	27	0.964	1		TCAAATATTACGGTGAATTCGAGTTCTGGGTCGCTTCCATC	CGA	1
rtt109_25	rtt109Δ	CAN1	374	374	1	C	G	5	SNP	5	1	1		CCCAGTGGGCGCTCTTATATCATATTTATTTATGGGTTCTT	TCA	1
rtt109_26	rtt109Δ	CAN1	1214	1214	1	C	G	17	SNP	15	0.882	2	238	CCGTATTTTATTTGGTCTATCAAAGAACAAGTTGGCTCCTA	TCA	1
rtt109_26	rtt109Δ	CAN1	1453	1453	1	C	G	17	SNP	15	0.882	2		TGAAATACCGTGGCATCTCTCGTGACGAGTTACCATTTAAA	TCG	1
rtt109_27	rtt109Δ	CAN1	527	527	1	C	T	14	SNP	14	1	1		TGGTTACATGTATTGGTTTTCTTGGGCAATCACTTTTGCCC	TCT	1
rtt109_28	rtt109Δ	CAN1	452	452	1	C	T	16	SNP	16	1	1		TACATTCACCCCTGTTACATCCTCTTTCACAGTGTTCTCAC	TCC	1
rtt109_29	rtt109Δ	CAN1	925	925	1	G	A	15	SNP	15	1	1		TAGTTGGTATCACTGCTGGTGAAGCTGCAAACCCCAGAAAA	TGA	1
rtt109_3	rtt109Δ	CAN1	455	455	1	C	T	4	SNP	4	1	1		ATTCACCCCTGTTACATCCTCTTTCACAGTGTTCTCACAAA	TCT	1
rtt109_30	rtt109Δ	CAN1	455	455	1	C	T	28	SNP	28	1	1		ATTCACCCCTGTTACATCCTCTTTCACAGTGTTCTCACAAA	TCT	1
rtt109_31	rtt109Δ	CAN1	1163	1163	1	C	T	24	SNP	24	1	1		TATCTTAACAACCATTATTTCTGCCGCAAATTCAAATATTT	TCT	1
rtt109_32	rtt109Δ	CAN1	1214	1214	1	C	G	11	SNP	11	1	1		CCGTATTTTATTTGGTCTATCAAAGAACAAGTTGGCTCCTA	TCA	1
rtt109_33	rtt109Δ	CAN1	1175	1175	1	C	T	34	SNP	34	1	1		CATTATTTCTGCCGCAAATTCAAATATTTACGTTGGTTCCC	TCA	1
rtt109_34	rtt109Δ	CAN1	1267	1267	1	C	T	24	SNP	21	0.875	1		GGACCACCAAAGGTGGTGTTCCATACATTGCAGTTTTCGTT	TCC	1
rtt109_35	rtt109Δ	CAN1	424	424	1	G	A	19	SNP	17	0.895	1		CTGTCACGCAGTCCTTGGGTGAAATGGCTACATTCACCCCT	TGA	1
rtt109_36	rtt109Δ	CAN1	452	452	1	C	T	13	SNP	11	0.846	1		TACATTCACCCCTGTTACATCCTCTTTCACAGTGTTCTCAC	TCC	1
rtt109_37	rtt109Δ	CAN1	1244	1244	1	C	G	31	SNP	31	1	1		GTTGGCTCCTAAATTCCTGTCAAGGACCACCAAAGGTGGTG	TCA	1
rtt109_38	rtt109Δ	CAN1	1491	1492	1	C	DEL	18	Deletion	17	0.944	1		AAAGCTAAATTAATGCCCGGCTTGGCTTATTATGCGGCCAC	GCT	0
rtt109_39	rtt109Δ	CAN1	901	901	1	G	A	15	SNP	15	1	1		CCTTCACATTTCAAGGTACTGAACTAGTTGGTATCACTGCT	TGA	1
rtt109_4	rtt109Δ	CAN1	979	979	1	C	T	39	SNP	38	0.974	1		CCATCAAAAAAGTTGTTTTCCGTATCTTAACCTTCTACATT	CCG	0
rtt109_40	rtt109Δ	CAN1	612	612	1	G	A	9	SNP	9	1	1		AAAGTTCCACTGGCGGCATGGATTAGTATTTTTTGGGTAAT	GGA	1
rtt109_5	rtt109Δ	CAN1	1163	1164	1	C	DEL	37	Deletion	36	0.973	1		TATCTTAACAACCATTATTTCTGCCGCAAATTCAAATATTT	TCT	1
rtt109_6	rtt109Δ	CAN1	443	443	1	C	T	34	SNP	33	0.971	1		TGAAATGGCTACATTCACCCCTGTTACATCCTCTTTCACAG	CCT	0
rtt109_7	rtt109Δ	CAN1	1537	1537	1	C	T	31	SNP	30	0.968	1		TGACGATCATTATCATTATTCAAGGTTTCACGGCTTTTGCA	TCA	1
rtt109_8	rtt109Δ	CAN1	1537	1537	1	C	T	19	SNP	18	0.947	1		TGACGATCATTATCATTATTCAAGGTTTCACGGCTTTTGCA	TCA	1
rtt109_9	rtt109Δ	CAN1	424	425	1	G	DEL	43	Deletion	40	0.93	1		CTGTCACGCAGTCCTTGGGTGAAATGGCTACATTCACCCCT	TGA	1
seg1_10	seg1Δ	CAN1	1606	1607	1	C	DEL	11	Deletion	7	0.636	1		CCGCCTATATCTCTGTTTTCCTGTTCTTAGCTGTTTGGATC	CCT	0
seg1_11	seg1Δ	CAN1	938	938	1	C	G	7	SNP	2	0.286	1		TGCTGGTGAAGCTGCAAACCCCAGAAAATCCGTTCCAAGAG	CCC	0
seg1_13	seg1Δ	CAN1	1083	1084	1	C	DEL	8	Deletion	6	0.75	1		TCCTACGTTTCTACTTCTCCCTTTATTATTGCTATTGAGAA	CCT	0
seg1_15	seg1Δ	CAN1	809	810	1	G	DEL	7	Deletion	4	0.571	1		GAGAAACCCAGGTGCCTGGGGTCCAGGTATAATATCTAAGG	GGT	0
seg1_16	seg1Δ	CAN1	977	978	1	T	DEL	72	Deletion	72	1	1		AGCCATCAAAAAAGTTGTTTTCCGTATCTTAACCTTCTACA	TTC	0
seg1_18	seg1Δ	CAN1	1175	1175	1	C	T	77	SNP	76	0.987	1		CATTATTTCTGCCGCAAATTCAAATATTTACGTTGGTTCCC	TCA	1
seg1_23	seg1Δ	CAN1	374	374	1	C	G	4	SNP	2	0.5	1		CCCAGTGGGCGCTCTTATATCATATTTATTTATGGGTTCTT	TCA	1
seg1_25	seg1Δ	CAN1	978	978	1	INS	T	2	Insertion	2	1	2	0	CCATCAAAAAAGTTGTTTTCCGTATCTTAACCTTCTACAT		0
seg1_25	seg1Δ	CAN1	978	978	1	C	G	2	SNP	2	1	2		GCCATCAAAAAAGTTGTTTTCCGTATCTTAACCTTCTACAT	TCC	1
seg1_26	seg1Δ	CAN1	11	11	1	C	G	3	SNP	2	0.667	1		ATGACAAATTCAAAAGAAGACGCCGACATAG	TCA	1
seg1_28	seg1Δ	CAN1	1403	1403	1	C	G	78	SNP	77	0.987	1		TTTTGCATGGTTATTTATCTCAATCTCGCACATCAGATTTA	TCA	1
seg1_3	seg1Δ	CAN1	1214	1214	1	C	G	6	SNP	4	0.667	1		CCGTATTTTATTTGGTCTATCAAAGAACAAGTTGGCTCCTA	TCA	1
seg1_33	seg1Δ	CAN1	577	577	1	C	T	44	SNP	43	0.977	1		GTGTAGTTGGCCAAGTCATTCAATTTTGGACGTACAAAGTT	TCA	1
seg1_34	seg1Δ	CAN1	939	940	1	C	DEL	8	Deletion	4	0.5	1		GCTGGTGAAGCTGCAAACCCCAGAAAATCCGTTCCAAGAGC	CCA	0
seg1_35	seg1Δ	CAN1	1244	1244	1	C	G	68	SNP	64	0.941	1		GTTGGCTCCTAAATTCCTGTCAAGGACCACCAAAGGTGGTG	TCA	1
seg1_37	seg1Δ	CAN1	1537	1537	1	C	T	90	SNP	89	0.989	1		TGACGATCATTATCATTATTCAAGGTTTCACGGCTTTTGCA	TCA	1
seg1_38	seg1Δ	CAN1	113	113	1	C	G	68	SNP	68	1	1		AACACACCACAGACGTGGGTCAATACCATTAAAAGATGAGA	TCA	1
seg1_40	seg1Δ	CAN1	1214	1214	1	C	G	6	SNP	4	0.667	1		CCGTATTTTATTTGGTCTATCAAAGAACAAGTTGGCTCCTA	TCA	1
seg1_41	seg1Δ	CAN1	374	374	1	C	G	87	SNP	86	0.989	1		CCCAGTGGGCGCTCTTATATCATATTTATTTATGGGTTCTT	TCA	1
seg1_43	seg1Δ	CAN1	11	11	1	C	G	46	SNP	46	1	1		ATGACAAATTCAAAAGAAGACGCCGACATAG	TCA	1
seg1_45	seg1Δ	CAN1	113	113	1	C	G	88	SNP	87	0.989	1		AACACACCACAGACGTGGGTCAATACCATTAAAAGATGAGA	TCA	1
seg1_46	seg1Δ	CAN1	113	113	1	C	G	43	SNP	41	0.953	2	302	AACACACCACAGACGTGGGTCAATACCATTAAAAGATGAGA	TCA	1
seg1_46	seg1Δ	CAN1	416	416	1	C	G	43	SNP	41	0.953	2		GGCATATTCTGTCACGCAGTCCTTGGGTGAAATGGCTACAT	TCC	1
seg1_47	seg1Δ	CAN1	1244	1244	1	C	G	66	SNP	66	1	1		GTTGGCTCCTAAATTCCTGTCAAGGACCACCAAAGGTGGTG	TCA	1
seg1_48	seg1Δ	CAN1	1214	1214	1	C	G	7	SNP	2	0.286	2	188	CCGTATTTTATTTGGTCTATCAAAGAACAAGTTGGCTCCTA	TCA	1
seg1_48	seg1Δ	CAN1	1403	1403	1	C	G	7	SNP	2	0.286	2		TTTTGCATGGTTATTTATCTCAATCTCGCACATCAGATTTA	TCA	1
seg1_6	seg1Δ	CAN1	113	113	1	C	G	4	SNP	2	0.5	1		AACACACCACAGACGTGGGTCAATACCATTAAAAGATGAGA	TCA	1
seg1_9	seg1Δ	CAN1	939	939	1	C	T	9	SNP	4	0.444	1		GCTGGTGAAGCTGCAAACCCCAGAAAATCCGTTCCAAGAGC	CCA	0
ser3_51	ser3Δ	CAN1	374	374	1	C	G	6	SNP	2	0.333	1		CCCAGTGGGCGCTCTTATATCATATTTATTTATGGGTTCTT	TCA	1
sgs1_1	sgs1Δ	CAN1	568	568	1	C	T	3	SNP	2	0.667	1		TGGAACTTAGTGTAGTTGGCCAAGTCATTCAATTTTGGACG	CCA	0
sgs1_101	sgs1Δ	CAN1	1214	1214	1	C	T	20	SNP	20	1	1		CCGTATTTTATTTGGTCTATCAAAGAACAAGTTGGCTCCTA	TCA	1
sgs1_102	sgs1Δ	CAN1	455	455	1	C	T	29	SNP	29	1	1		ATTCACCCCTGTTACATCCTCTTTCACAGTGTTCTCACAAA	TCT	1
sgs1_103	sgs1Δ	CAN1	1662	1662	1	G	A	26	SNP	25	0.962	1		TTCAGATGCAGATTTATTTGGAAGATTGGAGATGTCGACAT	GGA	1
sgs1_104	sgs1Δ	CAN1	679	679	1	G	A	20	SNP	20	1	1		TCAAATATTACGGTGAATTCGAGTTCTGGGTCGCTTCCATC	CGA	1
sgs1_105	sgs1Δ	CAN1	979	979	1	C	T	10	SNP	9	0.9	1		CCATCAAAAAAGTTGTTTTCCGTATCTTAACCTTCTACATT	CCG	0
sgs1_106	sgs1Δ	CAN1	1244	1244	1	C	G	16	SNP	16	1	1		GTTGGCTCCTAAATTCCTGTCAAGGACCACCAAAGGTGGTG	TCA	1
sgs1_107	sgs1Δ	CAN1	611	611	1	G	A	18	SNP	17	0.944	1		CAAAGTTCCACTGGCGGCATGGATTAGTATTTTTTGGGTAA	TGG	0
sgs1_108	sgs1Δ	CAN1	789	789	1	G	A	32	SNP	30	0.938	1		CCAGTTGGATTCCGTTATTGGAGAAACCCAGGTGCCTGGGG	GGA	1
sgs1_109	sgs1Δ	CAN1	1623	1623	1	G	A	22	SNP	21	0.955	1		TTCCTGTTCTTAGCTGTTTGGATCTTATTTCAATGCATATT	GGA	1
sgs1_110	sgs1Δ	CAN1	1244	1244	1	C	G	29	SNP	29	1	1		GTTGGCTCCTAAATTCCTGTCAAGGACCACCAAAGGTGGTG	TCA	1
sgs1_111	sgs1Δ	CAN1	1403	1403	1	C	G	25	SNP	25	1	2	284	TTTTGCATGGTTATTTATCTCAATCTCGCACATCAGATTTA	TCA	1
sgs1_111	sgs1Δ	CAN1	1688	1688	1	C	T	25	SNP	25	1	2		TGGAGATGTCGACATCGATTCCGATAGAAGAGACATTGAGG	TCC	1
sgs1_112	sgs1Δ	CAN1	1175	1175	1	C	G	29	SNP	27	0.931	1		CATTATTTCTGCCGCAAATTCAAATATTTACGTTGGTTCCC	TCA	1
sgs1_113	sgs1Δ	CAN1	979	979	1	C	T	8	SNP	8	1	1		CCATCAAAAAAGTTGTTTTCCGTATCTTAACCTTCTACATT	CCG	0
sgs1_114	sgs1Δ	CAN1	577	577	1	C	T	23	SNP	23	1	1		GTGTAGTTGGCCAAGTCATTCAATTTTGGACGTACAAAGTT	TCA	1
sgs1_115	sgs1Δ	CAN1	1214	1214	1	C	G	17	SNP	17	1	1		CCGTATTTTATTTGGTCTATCAAAGAACAAGTTGGCTCCTA	TCA	1
sgs1_116	sgs1Δ	CAN1	1175	1175	1	C	T	14	SNP	14	1	1		CATTATTTCTGCCGCAAATTCAAATATTTACGTTGGTTCCC	TCA	1
sgs1_117	sgs1Δ	CAN1	1633	1633	1	C	T	18	SNP	18	1	1		TAGCTGTTTGGATCTTATTTCAATGCATATTCAGATGCAGA	TCA	1
sgs1_118	sgs1Δ	CAN1	1175	1175	1	C	T	24	SNP	23	0.958	1		CATTATTTCTGCCGCAAATTCAAATATTTACGTTGGTTCCC	TCA	1
sgs1_119	sgs1Δ	CAN1	1214	1214	1	C	G	12	SNP	12	1	1		CCGTATTTTATTTGGTCTATCAAAGAACAAGTTGGCTCCTA	TCA	1
sgs1_12	sgs1Δ	CAN1	356	356	1	C	T	5	SNP	4	0.8	1		ACCTCTGACCAACGCCGGCCCAGTGGGCGCTCTTATATCAT	CCA	0
sgs1_120	sgs1Δ	CAN1	857	857	1	G	A	18	SNP	18	1	1		CGAAGGGAGGTTCTTAGGTTGGGTTTCCTCTTTGATTAACG	TGG	0
sgs1_121	sgs1Δ	CAN1	356	356	1	C	T	12	SNP	10	0.833	1		ACCTCTGACCAACGCCGGCCCAGTGGGCGCTCTTATATCAT	CCA	0
sgs1_122	sgs1Δ	CAN1	1175	1175	1	C	T	18	SNP	16	0.889	1		CATTATTTCTGCCGCAAATTCAAATATTTACGTTGGTTCCC	TCA	1
sgs1_123	sgs1Δ	CAN1	1175	1175	1	C	G	23	SNP	23	1	1		CATTATTTCTGCCGCAAATTCAAATATTTACGTTGGTTCCC	TCA	1
sgs1_124	sgs1Δ	CAN1	979	979	1	C	T	13	SNP	11	0.846	1		CCATCAAAAAAGTTGTTTTCCGTATCTTAACCTTCTACATT	CCG	0
sgs1_125	sgs1Δ	CAN1	424	424	1	G	A	23	SNP	21	0.913	1		CTGTCACGCAGTCCTTGGGTGAAATGGCTACATTCACCCCT	TGA	1
sgs1_126	sgs1Δ	CAN1	452	452	1	C	T	15	SNP	14	0.933	1		TACATTCACCCCTGTTACATCCTCTTTCACAGTGTTCTCAC	TCC	1
sgs1_127	sgs1Δ	CAN1	1163	1163	1	C	T	17	SNP	16	0.941	1		TATCTTAACAACCATTATTTCTGCCGCAAATTCAAATATTT	TCT	1
sgs1_128	sgs1Δ	CAN1	1175	1175	1	C	T	13	SNP	10	0.769	1		CATTATTTCTGCCGCAAATTCAAATATTTACGTTGGTTCCC	TCA	1
sgs1_129	sgs1Δ	CAN1	443	443	1	C	T	25	SNP	24	0.96	1		TGAAATGGCTACATTCACCCCTGTTACATCCTCTTTCACAG	CCT	0
sgs1_13	sgs1Δ	CAN1	1214	1214	1	C	G	2	SNP	2	1	1		CCGTATTTTATTTGGTCTATCAAAGAACAAGTTGGCTCCTA	TCA	1
sgs1_130	sgs1Δ	CAN1	979	979	1	C	T	42	SNP	42	1	1		CCATCAAAAAAGTTGTTTTCCGTATCTTAACCTTCTACATT	CCG	0
sgs1_131	sgs1Δ	CAN1	1175	1175	1	C	T	22	SNP	21	0.955	1		CATTATTTCTGCCGCAAATTCAAATATTTACGTTGGTTCCC	TCA	1
sgs1_132	sgs1Δ	CAN1	1623	1623	1	G	A	23	SNP	21	0.913	1		TTCCTGTTCTTAGCTGTTTGGATCTTATTTCAATGCATATT	GGA	1
[truncated: 1,080 more rows]

## Sheet: README
Supplemental Table S5: List of all CAN1 mutations
