# Supplementary material for: Genetic inhibitors of APOBEC3B-induced mutagenesis
Source: Genome Res. 2023 Sep;33(9):1568–81. doi: 10.1101/gr.277430.122 (PMC10620048; doi:10.1101/gr.277430.122)
Supplement: Supplement 8 [file Supplemental_Table_S8.xlsx]

## Sheet: Sheet1
Oligo Name	Oligo Sequence	description
oAJB-097	GATGTCCACGAGGTCTCT	for amplification of KanMX cassette to confirm library deletion strain identity
oAJB-098	CGGTGTCGGTCTCGTAG	for amplification of KanMX cassette to confirm library deletion strain identity
oAJB-099	ATGTGATGTGAGAACTGTATCCT	sequencing strain specific barcodes to confirm identity of deletion in library
oAJB-100	CAGACCGATACCAGGATCTTG	sequencing strain specific barcodes to confirm identity of deletion in library
oTM-227	CGTGACCATTCTACCTACTGGTACT	ung1∆-confirmation-A
oTM-228	TGTATGATCAGCTTGCTCTTTAGTG	ung1∆-confirmation-B
oTM-229	GGGTTTTATTGCTTAATACCTCGTT	ung1∆-confirmation-C
oTM-230	ATTTCTTGAAAGGCAGGAGTAAGTT	ung1∆-confirmation-D
oTM-231	TGATATATATTATCAGAAGCTGTACACAAGCCGTTCACATACATGCAGCTGAAGCTTCGTACGC	ung1∆-generation of deletion cassette
oTM-232	AAAGAGTTTGGAAATCGAGACCTGCATATGCAATAGTAATATTCAGCATAGGCCACTAGTGGATCTG	ung1∆-generation of deletion cassette
oTM-245	GCTTAGGTTAACTCGGTTTTCTACC	arp6∆-confirmation-A
oTM-246	AAAGACTGCTACAGGAGACTTGAAA	arp6∆-confirmation-B
oTM-247	ATGTACTTCCTGACTTCCAAACAAG	arp6∆-confirmation-C
oTM-248	CAGGTGTATTTTGATCGTTTTCTCT	arp6∆-confirmation-D
oTM-249	AAGGAGAAGAAGCGCAGAATCGTGGACAAGATAATTTAAACTATGCAGCTGAAGCTTCGTACGC	arp6∆-generation of deletion cassette
oTM-250	6.66667e+25	arp6∆-generation of deletion cassette
oTM-251	AAAGGCGCGTCTTAATTTTCTTCACT	pif1∆-confirmation-A
oTM-252	GTGCGATACGTTTTTGAGTAAAAGAAA	pif1∆-confirmation-B
oTM-253	ATCAAGTTCATTCATTGGTTTCCGAC	pif1∆-confirmation-C
oTM-254	CTTTTTTCTATCGAAGGAGGTTCACC	pif1∆-confirmation-D
oTM-255	TATCCATTGAGCGATTAGCTTACTTGTATCAATCAATTTTACATGCAGCTGAAGCTTCGTACGC	pif1∆-generation of deletion cassette
oTM-256	TAGCAGTTTGTATTCTATATAACTATGTGTATTAATATGTACTTAGCATAGGCCACTAGTGGATCTG	pif1∆-generation of deletion cassette
oTM-257	TAATCTTTTTTTTTGCTGAAAAACCC	tda9∆-confirmation-A
oTM-258	ATCTCGTTTGATCGGAAGTCCTTTGA	tda9∆-confirmation-B
oTM-259	GGGGTACATGAGGAGATTGGAA	tda9∆-confirmation-C
oTM-260	TTGACGATCACCTTGCTTGTTTTTATT	tda9∆-confirmation-D
oTM-261	AGCGAATATTTCAGCTTCTTGTAATTGTACGTTGCATCTGCCATGCAGCTGAAGCTTCGTACGC	tda9∆-generation of deletion cassette
oTM-262	ATATAATGTTACATACGGATATGCTAAATATCTATCTAAAGTCTAGCATAGGCCACTAGTGGATCTG	tda9∆-generation of deletion cassette
oTM-263	GGGTAATACCTGCTGTAGTCTTCAA	top1∆-confirmation-A
oTM-264	CACTGGTTCGGTCTTTATTTTCTTA	top1∆-confirmation-B
oTM-265	GAGAAATTGAAAAATATCAGCGAAA	top1∆-confirmation-C
oTM-266	GTATTTTTGCTTCCAAAACATCAAG	top1∆-confirmation-D
oTM-267	ATCTAAAGGGAGGGCAGAGCTCGAAACTTGAAACGCGTAAAAATGCAGCTGAAGCTTCGTACGC	top1∆-generation of deletion cassette
oTM-268	CGTGAATGTATTTGCTTCTCCCCTATGCTGCGTTTCTTTGCGTTAGCATAGGCCACTAGTGGATCTG	top1∆-generation of deletion cassette
oTM-269	GAAGAAGAAAGGGAAAAAGTCAAAG	ddc1∆-confirmation-A
oTM-270	GCAATTAACTCATTTGTTGTCACTG	ddc1∆-confirmation-B
oTM-271	AACAGTCCTTTGAAAGTGTCGTATC	ddc1∆-confirmation-C
oTM-272	GCAATAAGCTAATCAAAATGGAAAA	ddc1∆-confirmation-D
oTM-273	GCTAGTGTAACAATAACACAGCATAACTTTGCTTAGACATATATGCAGCTGAAGCTTCGTACGC	ddc1∆-generation of deletion cassette
oTM-274	TCTAATATTTACACGCCTTTATACTGATTTTGCATTATGGTTTTAGCATAGGCCACTAGTGGATCTG	ddc1∆-generation of deletion cassette
oTM-275	CCACAAAGAGAATGAGAAAATTGAT	dma1∆-confirmation-A
oTM-276	CTTGGTTTGGAGGATATATGAAATG	dma1∆-confirmation-B
oTM-277	TCTATCTTCTGCGTCTACCACTTCT	dma1∆-confirmation-C
oTM-278	AGTACACTACCTGTTAGGACGATGG	dma1∆-confirmation-D
oTM-279	GATTTCCTGTGCACATACGTTCTGTATAGTGGTTATTCCTGGATGCAGCTGAAGCTTCGTACGC	dma1∆-generation of deletion cassette
oTM-280	TATATATATATATATATATATATAGCACAAAATTTCATGTGATCAGCATAGGCCACTAGTGGATCTG	dma1∆-generation of deletion cassette
oTM-281	ATACTTTTTCCCCTGATAAGTTTGC	top3∆-confirmation-A
oTM-282	TGCTGCATTTAATATGTGTTGTCTT	top3∆-confirmation-B
oTM-283	ATACTCTCTTGCAAGTTTATGACCG	top3∆-confirmation-C
oTM-284	CTTCCTCTTTTCTCTTCAACTACCC	top3∆-confirmation-D
oTM-285	GTGCGCTCGCTTCAGCTACGTAAAGGTGTATTATAGACAATAATGCAGCTGAAGCTTCGTACGC	top3∆-generation of deletion cassette
oTM-286	AAGCGGAGAGCTTTTTTGAAGACAAAGGGCGGCAAAAACGCCTTAGCATAGGCCACTAGTGGATCTG	top3∆-generation of deletion cassette
oTM-287	CATTAGTTAATGTCCGGAAGAGAAG	chl1∆-confirmation-A
oTM-288	TCACTATCATCTTCATTCGTTTTGA	chl1∆-confirmation-B
oTM-289	ATGTCTCCCTCCCTTGTAAATAATC	chl1∆-confirmation-C
oTM-290	ACAACGGGTAATAGACATAAAACGA	chl1∆-confirmation-D
oTM-291	GAGTAGAAAACCAGGCTAAAAACAGTCACACTAGTCCAAAAAATGCAGCTGAAGCTTCGTACGC	chl1∆-generation of deletion cassette
oTM-292	ATATATAGTAGTAATCACAGTATACACGTAAACGTATTCCTTTTAGCATAGGCCACTAGTGGATCTG	chl1∆-generation of deletion cassette
oTM-305	TACTGTAACCATTGTGTTTTAGGGC	ctf18∆-confirmation-A
oTM-306	GTTATAGGTGAAGTCTTTTGTGCGT	ctf18∆-confirmation-B
oTM-307	GAGGAATTAGTTCAATTGCTGAAAA	ctf18∆-confirmation-C
oTM-308	CCCTATCTGTTTTGGTTATATGCAC	ctf18∆-confirmation-D
oTM-309	GTACACTATTTGACCCAAAAGGTGGATGTAAGGTCAGGGATCATGCAGCTGAAGCTTCGTACGC	ctf18∆-generation of deletion cassette
oTM-310	AGTATGCTTCTTAAGAGAGACTGCGTATATATCTTACGTCATTTAGCATAGGCCACTAGTGGATCTG	ctf18∆-generation of deletion cassette
oTM-311	CTAGACATTGTTGTAATATGCCGTG	soh1∆-confirmation-A
oTM-312	CACCAGTACTCCAGGTATTTCAAGT	soh1∆-confirmation-B
oTM-313	ACTTGAAATACCTGGAGTACTGGTG	soh1∆-confirmation-C
oTM-314	GGTTCAAACGTTGATTTATTACGTC	soh1∆-confirmation-D
oTM-315	AGCACTCATAAGACGGCAAAGTTCCCCCAAGCTCCACCCAGGATGCAGCTGAAGCTTCGTACGC	soh1∆-generation of deletion cassette
oTM-316	AGATATATGAATGCGTGCGAATGTAGTTATAATTAGGTGTGTTCAGCATAGGCCACTAGTGGATCTG	soh1∆-generation of deletion cassette
oTM-317	ATTCGACAATTCAAAATTGAGAGAG	nat1∆-confirmation-A
oTM-318	TATATTTGCTTGTTAGTGGACCCAT	nat1∆-confirmation-B
oTM-319	GACGAAAGGGATTATATTTTGGACT	nat1∆-confirmation-C
oTM-320	TATATTTTTCTTGGGTGGTGAAAAA	nat1∆-confirmation-D
oTM-321	AAGACAAATACCATTGAGGAAGGCGATTGACCCTAACGAAGTATGCAGCTGAAGCTTCGTACGC	nat1∆-generation of deletion cassette
oTM-322	TAAATTAAGTAAGAGTTAATTGACACATTGAGGAGTTGCAGGCTAGCATAGGCCACTAGTGGATCTG	nat1∆-generation of deletion cassette
oTM-323	CGAGAGTTGTATCCAGTTTTCTTGT	btn2∆-confirmation-A
oTM-324	TATGCTCAATTCATCACCTCTATGA	btn2∆-confirmation-B
oTM-325	CCAATAATTGAATCCAAAATAGACG	btn2∆-confirmation-C
oTM-326	CTTGCCATTCCACCATAAAATACTA	btn2∆-confirmation-D
oTM-327	AACCAAAAGAAAATAACTAATAGACCCCATTACAATATAGAAATGCAGCTGAAGCTTCGTACGC	btn2∆-generation of deletion cassette
oTM-328	ATGCCGTAAAAATGAAAGATGGGGAGTATGTATTATCACCCATTAGCATAGGCCACTAGTGGATCTG	btn2∆-generation of deletion cassette
oTM-329	AATATCATGGAACAAATGATACGCT	ard1∆-confirmation-A
oTM-330	GAATAGGGTAGCCATTTTCATTTTT	ard1∆-confirmation-D
oTM-331	TTACCTTTTTAGGATATCCGTCACC	def1∆-confirmation-A
oTM-332	CTCCCACGTCTATACCAATGTACTC	def1∆-confirmation-D
oTM-335	CAATCCATAGTCTCTTCTTTTTCCA	cmr1∆-confirmation-A
oTM-336	CTCTATGTTTTAAAGCGAAGGACAG	cmr1∆-confirmation-D
oTM-337	GAGTTTACATGTTACGTTCCCATTC	hpr1∆-confirmation-A
oTM-338	ATTTCTTCTCAATCATGTCTTCCAG	hpr1∆-confirmation-D
oTM-339	GCAGGCGTGGATATAGAATACATAG	srb2∆-confirmation-A
oTM-340	CACTGAACAAGTTTATTGACAATGC	srb2∆-confirmation-D
oTM-341	GGCAGCGTATAGTATAACCAGAAAA	dcc1∆-confirmation-A
oTM-342	TTGATTTCAACATCTTCCAGTTGTA	dcc1∆-confirmation-D
oTM-343	CCATTGGGTTCTTTATTACTTCCTT	mad3∆-confirmation-A
oTM-344	TCATTACTGCCGTTTAATATTTGGT	mad3∆-confirmation-D
oTM-345	AGTTGTCGTATTTATCTTCTGCACC	coq4∆-confirmation-A
oTM-346	AGAATAATGGTCGGATACGATAACA	coq4∆-confirmation-D
oTM-347	TCTCCTAAAATCGATCAAGATATGG	rtt109∆-confirmation-A
oTM-348	TGGAGATTCTATTTCTTTCAAAACG	rtt109∆-confirmation-B
oTM-349	GCATATACTAAATGGCGAGGAACTA	rtt109∆-confirmation-C
oTM-350	GATAAACTCTTTAGCAAATTGTGGC	rtt109∆-confirmation-D
oTM-351	CAGTAGAGTTAAAAGGTCAATTCAACCGGTCTTCAATAAGACATGCAGCTGAAGCTTCGTACGC	rtt109∆-generation of deletion cassette
oTM-352	CGATGCTACATACGTGTACTAAATAATAAATATCAATATGTATCAGCATAGGCCACTAGTGGATCTG	rtt109∆-generation of deletion cassette
oTM-353	AATGCTGTTTTATTCCGTTCTTACA	asf1∆-confirmation-A
oTM-354	AGTAACCGACCCTAACAAACTCTCT	asf1∆-confirmation-B
oTM-355	AGAGAGTTTGTTAGGGTCGGTTACT	asf1∆-confirmation-C
oTM-356	GATTTTTATTCCAACATGTTCGTTC	asf1∆-confirmation-D
oTM-357	TACTCTCCCTACCATCCAATTGAAACATAAGATATAGAAAAGATGCAGCTGAAGCTTCGTACGC	asf1∆-generation of deletion cassette
oTM-358	ACCTCTCTTGCAGGTACCATTAATCTTATAACCCATAAATTCTTAGCATAGGCCACTAGTGGATCTG	asf1∆-generation of deletion cassette
oTM-359	CAGGATTTTCTTTGACTTCACTGAT	hst4∆-confirmation-A
oTM-360	ATGACAGTCTAGGTTTCCTGTTACG	hst4∆-confirmation-B
oTM-361	CATAAAACACATGGAATGCAATAAA	hst4∆-confirmation-C
oTM-362	GGAAAAATTAGATTTGTTCAAGGGT	hst4∆-confirmation-D
oTM-363	CTGTATTTTAAAACTGTAAATAATACTAAGCAGAACCACAAAATGCAGCTGAAGCTTCGTACGC	hst4∆-generation of deletion cassette
oTM-364	ATTAATTTTATCTCCAACCTTTTTTGGTAGGACAAATACTTTCTAGCATAGGCCACTAGTGGATCTG	hst4∆-generation of deletion cassette
oTM-365	AGAAGCAGTTCTTTTAATCTTTGGG	mms22∆-confirmation-A
oTM-366	CGTTCTAAACTGTATGGCATCTTTT	mms22∆-confirmation-B
oTM-367	TAAAAATGAAATTCGAGCAGGTATC	mms22∆-confirmation-C
oTM-368	TATTATTAATCAAACGGGAAGGACA	mms22∆-confirmation-D
oTM-369	TTGTAGATTTGAAGTTTAGTGGTAGCGTCAGCAGATAAGCTTATGCAGCTGAAGCTTCGTACGC	mms22∆-generation of deletion cassette
oTM-370	TACGGAGAATTTTTAAATATGCTTATATTACATGTGTATAATTTAGCATAGGCCACTAGTGGATCTG	mms22∆-generation of deletion cassette
oTM-371	GATAAGATTGCGACAAAAGAGGATA	rpd3∆-confirmation-A
oTM-372	CAGTATGGAACTGACACATTTCTTG	rpd3∆-confirmation-B
oTM-373	CTAGTGTTCAGTTGAATCACACACC	rpd3∆-confirmation-C
oTM-374	GTGGGACGAGACGTTTAGATAGTAA	rpd3∆-confirmation-D
oTM-375	GCCATACAAAACATTCGTGGCTACAACTCGATATCCGTGCAGATGCAGCTGAAGCTTCGTACGC	rpd3∆-generation of deletion cassette
oTM-376	TTTCACATTATTTATATTCGTATATACTTCCAACTCTTTTTTTCAGCATAGGCCACTAGTGGATCTG	rpd3∆-generation of deletion cassette
oTM-377	TCACCCTGAGCCTTATAGAACATAG	eaf1∆-confirmation-A
oTM-378	TGATTTGACTGATACATTTTCGCTA	eaf1∆-confirmation-B
oTM-379	TCCATACAAAGAGGTCATAGGAGAC	eaf1∆-confirmation-C
oTM-380	CAAATTCGGTAGAGAAGTTGAAAAA	eaf1∆-confirmation-D
oTM-381	TTTAGAGACATCATAATCAAAAGTACAGTTTCCGCCTCAAAGATGCAGCTGAAGCTTCGTACGC	eaf1∆-generation of deletion cassette
oTM-382	TCCTGTGGAGTTGGTGACTTTATCCTTGGAGCAGAATTAATGTTAGCATAGGCCACTAGTGGATCTG	eaf1∆-generation of deletion cassette
oTM-383	CTTTTCAATACTCGAGAGCAAAGAC	gcn5∆-confirmation-A
oTM-384	ATCATTATTCACCACCCTAAACTCA	gcn5∆-confirmation-B
oTM-385	TTAAAAAGCAAGGCTTCACTAAAGA	gcn5∆-confirmation-C
oTM-386	GTTGTATAACAAAGCAAGACGGATT	gcn5∆-confirmation-D
oTM-387	CCCAAAAGTCTTCAGTTAACTCAGGTTCGTATTCTACATTAGATGCAGCTGAAGCTTCGTACGC	gcn5∆-generation of deletion cassette
oTM-388	CTTCTTCGAAAGGAATAGTAGCGGAAAAGCTTCTTCTACGCATTAGCATAGGCCACTAGTGGATCTG	gcn5∆-generation of deletion cassette
oTM-389	GTTCGATGAAAAATCACCAGTAGAG	slx4∆-confirmation-A
oTM-390	CAGTCCTTGAACGTTCGTAGTTATT	slx4∆-confirmation-B
oTM-391	GCTAAATGAGCTAATTGAAAAGCTG	slx4∆-confirmation-C
oTM-392	TAAAGTAAAGGCTTTGCAGAGAATG	slx4∆-confirmation-D
oTM-393	GTTCCATAATAATAACCAGTAGTTCAGTTGGGGAACTTAATAATGCAGCTGAAGCTTCGTACGC	slx4∆-generation of deletion cassette
oTM-394	TTTGTTTTGTTTTTGTTTTGTCAAATTCTCAATCATTCGGCACTAGCATAGGCCACTAGTGGATCTG	slx4∆-generation of deletion cassette
oTM-395	TGAACGTCTTACATATTGAACGAAA	yaf9∆-confirmation-A
oTM-396	AAGAACACTCAATAAAAGTTTCCCC	yaf9∆-confirmation-D
oTM-397	AAAGTTCATCACCTTCCTTAGCAC	hst3∆-confirmation-A
oTM-398	TTTGTAGACTGTTAAAGAGCCATCC	hst3∆-confirmation-D
oTM-399	GGACTTTTTATATCTTCTGGGAAGC	trm10∆-confirmation-A
oTM-400	TACAACATCAAAGCAAAATAAGCAA	trm10∆-confirmation-D
oTM-401	GCTGGTAAGTTATGATAGAAAGCCA	rad27∆-confirmation-A
oTM-402	TTAATGTTGCGTTTTGTGTTTCTTA	rad27∆-confirmation-D
oTM-403	TGATGAGAAGGAGGCTGAATTATAC	hos1∆-confirmation-A
oTM-404	ATGATGTCAAAGACAAGGAGTTTTC	hos1∆-confirmation-D
oTM-405	CCTGATCTAAAAGCTGATATACGGA	sgs1∆-confirmation-A
oTM-406	GAAAATTCGAAGTTGATAACTGAGC	sgs1∆-confirmation-D
oTM-407	ACTTAACCACAGAATGTTCTTCGAC	rtt107∆-confirmation-A
oTM-408	TTGTAGAAAAATTAAAAGGTTTGCG	rtt107∆-confirmation-D
oTM-048	GGATGTATGGGCTAAATG	confirming deletions with kanMX marker ∆-B
oTM-049	CCTCGACATCATCTGCCC	confirming deletions with kanMX marker ∆-C
oTM-052	AGTTATCCTTGGATTTGG	confirming deletions with K.L. LEU2 marker ∆-B
oTM-053	ATCTCATGGATGATATCC	confirming deletions with K.L. LEU2 marker ∆-C
canTM_F1	gcgctctgtgtgcagcAAGAGTGGTTGCGAACAGAGTAAACC
canTM_F2	tcatgagtcgacactaAAGAGTGGTTGCGAACAGAGTAAACC
canTM_F3	tatctatcgtatacgcAAGAGTGGTTGCGAACAGAGTAAACC
canTM_F4	atcacactgcatctgaAAGAGTGGTTGCGAACAGAGTAAACC
canTM_F5	acgtacgctcgtcataAAGAGTGGTTGCGAACAGAGTAAACC
canTM_F6	tgtgagtcagtacgcgAAGAGTGGTTGCGAACAGAGTAAACC
canTM_F7	agagacacgatactcaAAGAGTGGTTGCGAACAGAGTAAACC
canTM_F8	ctgctagagtctacagAAGAGTGGTTGCGAACAGAGTAAACC
canTM_F9	agcactcgcgtcagtgAAGAGTGGTTGCGAACAGAGTAAACC
canTM_F10	tcatgcacgtctcgctAAGAGTGGTTGCGAACAGAGTAAACC
canTM_F11	agagcatctctgtactAAGAGTGGTTGCGAACAGAGTAAACC
canTM_F12	cgcatcgactacgctaAAGAGTGGTTGCGAACAGAGTAAACC
canTM_F13	cgtagcgtgctatcacAAGAGTGGTTGCGAACAGAGTAAACC
canTM_F14	atgctgatgactgcgaAAGAGTGGTTGCGAACAGAGTAAACC
canTM_F15	tgcgtgagctgtacatAAGAGTGGTTGCGAACAGAGTAAACC
canTM_F16	cgatcatctatagacaAAGAGTGGTTGCGAACAGAGTAAACC
canTM_F17	cgacgtatctgacagtAAGAGTGGTTGCGAACAGAGTAAACC
canTM_F18	cacgtcactagagcgaAAGAGTGGTTGCGAACAGAGTAAACC
canTM_F19	tgtcgcagctactagtAAGAGTGGTTGCGAACAGAGTAAACC
canTM_F20	catacgctgtgtagcaAAGAGTGGTTGCGAACAGAGTAAACC
canTM_F21	agtcgcatgactgtgtAAGAGTGGTTGCGAACAGAGTAAACC
canTM_F22	cagtactgcacgatcgAAGAGTGGTTGCGAACAGAGTAAACC
canTM_F23	gtgctgagcatcagacAAGAGTGGTTGCGAACAGAGTAAACC
canTM_F24	cactgatcgatatgcaAAGAGTGGTTGCGAACAGAGTAAACC
canTM_F25	tacagtgtctgctgcgAAGAGTGGTTGCGAACAGAGTAAACC
canTM_F26	tacagatagtgtagcgAAGAGTGGTTGCGAACAGAGTAAACC
canTM_F27	tcgtagagctcgagacAAGAGTGGTTGCGAACAGAGTAAACC
canTM_F28	gagctgcgcactcgatAAGAGTGGTTGCGAACAGAGTAAACC
canTM_F29	gcgatgtcgctatgtgAAGAGTGGTTGCGAACAGAGTAAACC
canTM_F30	cgagagtcagcgcataAAGAGTGGTTGCGAACAGAGTAAACC
canTM_F31	tcacgatgagcacgtaAAGAGTGGTTGCGAACAGAGTAAACC
canTM_F32	gactgagatcatgatcAAGAGTGGTTGCGAACAGAGTAAACC
canTM_R1	tcatatgtagtactctTATGAGGGTGAGAATGCGAAATGGCG
canTM_R2	gcgatctatgcacacgTATGAGGGTGAGAATGCGAAATGGCG
canTM_R3	tgcagtcgagatacatTATGAGGGTGAGAATGCGAAATGGCG
canTM_R4	gactctgcgtcgagtcTATGAGGGTGAGAATGCGAAATGGCG
canTM_R5	tacagcgacgtcatcgTATGAGGGTGAGAATGCGAAATGGCG
canTM_R6	gcgcagactacgtgtgTATGAGGGTGAGAATGCGAAATGGCG
canTM_R7	gtctctgcgatacagcTATGAGGGTGAGAATGCGAAATGGCG
canTM_R8	agtatgagatagctcgTATGAGGGTGAGAATGCGAAATGGCG
canTM_R9	gcgacgagtactcatgTATGAGGGTGAGAATGCGAAATGGCG
canTM_R10	agtatcacagtcgctgTATGAGGGTGAGAATGCGAAATGGCG
canTM_R11	atcatatgatgcgacaTATGAGGGTGAGAATGCGAAATGGCG
canTM_R12	agacgtagatcacagcTATGAGGGTGAGAATGCGAAATGGCG
canTM_R13	cgtgtcatgctactcaTATGAGGGTGAGAATGCGAAATGGCG
canTM_R14	tgtgagactgcatgtcTATGAGGGTGAGAATGCGAAATGGCG
canTM_R15	gctcagtgcgctactgTATGAGGGTGAGAATGCGAAATGGCG
canTM_R16	actatcgcgcacgcagTATGAGGGTGAGAATGCGAAATGGCG
canTM_R17	tcagctgacgatgtgaTATGAGGGTGAGAATGCGAAATGGCG
canTM_R18	actgatgcgcacatgtTATGAGGGTGAGAATGCGAAATGGCG
canTM_R19	ctactctcagcagtgaTATGAGGGTGAGAATGCGAAATGGCG
canTM_R20	atctacatcacgactcTATGAGGGTGAGAATGCGAAATGGCG
canTM_R21	atatagtacagcgtctTATGAGGGTGAGAATGCGAAATGGCG
canTM_R22	gacacgactagatcgcTATGAGGGTGAGAATGCGAAATGGCG
canTM_R23	tacgagtctgtcatacTATGAGGGTGAGAATGCGAAATGGCG
canTM_R24	actcagctacatagtgTATGAGGGTGAGAATGCGAAATGGCG
canTM_R25	acgtatcatagtgagaTATGAGGGTGAGAATGCGAAATGGCG
canTM_R26	gagtcgtatcgctcatTATGAGGGTGAGAATGCGAAATGGCG
canTM_R27	gcgatcacgagtagacTATGAGGGTGAGAATGCGAAATGGCG
canTM_R28	ctagacgtacatgtcgTATGAGGGTGAGAATGCGAAATGGCG
canTM_R29	tagcagtcactgtgcgTATGAGGGTGAGAATGCGAAATGGCG
canTM_R30	cgtcatgcgatagctaTATGAGGGTGAGAATGCGAAATGGCG
canTM_R31	gcgcagtcgtctgtatTATGAGGGTGAGAATGCGAAATGGCG
canTM_R32	atgagctacgtacagaTATGAGGGTGAGAATGCGAAATGGCG
canTM_R33	gtcgcgagtctatcagTATGAGGGTGAGAATGCGAAATGGCG
canTM_R34	acatcgatctgcactaTATGAGGGTGAGAATGCGAAATGGCG
canTM_R35	agtatagcatagacgcTATGAGGGTGAGAATGCGAAATGGCG
canTM_R36	gtgagagcgtgactctTATGAGGGTGAGAATGCGAAATGGCG
canTM_R37	tgtcagtagatgactcTATGAGGGTGAGAATGCGAAATGGCG
canTM_R38	tcgtacgagatcgacaTATGAGGGTGAGAATGCGAAATGGCG
canTM_R39	ctacatgtgactcgagTATGAGGGTGAGAATGCGAAATGGCG
canTM_R40	gcgctatagtgctcgtTATGAGGGTGAGAATGCGAAATGGCG
CAN_R1	TCATATGTAGTACTCTGGGTGAGAATGCGAAATGGC
CAN_R2	GCGATCTATGCACACGGGGTGAGAATGCGAAATGGC
CAN_R3	TGCAGTCGAGATACATGGGTGAGAATGCGAAATGGC
CAN_R4	GACTCTGCGTCGAGTCGGGTGAGAATGCGAAATGGC
CAN_R5	TACAGCGACGTCATCGGGGTGAGAATGCGAAATGGC
CAN_R6	GCGCAGACTACGTGTGGGGTGAGAATGCGAAATGGC
CAN_R7	GTCTCTGCGATACAGCGGGTGAGAATGCGAAATGGC
CAN_R8	AGTATGAGATAGCTCGGGGTGAGAATGCGAAATGGC
CAN_R9	GCGACGAGTACTCATGGGGTGAGAATGCGAAATGGC
CAN_R10	AGTATCACAGTCGCTGGGGTGAGAATGCGAAATGGC
CAN_R11	ATCATATGATGCGACAGGGTGAGAATGCGAAATGGC
CAN_R12	AGACGTAGATCACAGCGGGTGAGAATGCGAAATGGC
CAN_R13	CGTGTCATGCTACTCAGGGTGAGAATGCGAAATGGC
CAN_R14	TGTGAGACTGCATGTCGGGTGAGAATGCGAAATGGC
CAN_R15	GCTCAGTGCGCTACTGGGGTGAGAATGCGAAATGGC
CAN_R16	ACTATCGCGCACGCAGGGGTGAGAATGCGAAATGGC
CAN_R25	TCAGCTGACGATGTGAGGGTGAGAATGCGAAATGGC
CAN_R26	ACTGATGCGCACATGTGGGTGAGAATGCGAAATGGC
CAN_R27	CTACTCTCAGCAGTGAGGGTGAGAATGCGAAATGGC
CAN_R28	ATCTACATCACGACTCGGGTGAGAATGCGAAATGGC
CAN_R29	ATATAGTACAGCGTCTGGGTGAGAATGCGAAATGGC
CAN_R30	GACACGACTAGATCGCGGGTGAGAATGCGAAATGGC
CAN_R31	TACGAGTCTGTCATACGGGTGAGAATGCGAAATGGC
CAN_R32	ACTCAGCTACATAGTGGGGTGAGAATGCGAAATGGC
CAN_R33	ACGTATCATAGTGAGAGGGTGAGAATGCGAAATGGC
CAN_R34	GAGTCGTATCGCTCATGGGTGAGAATGCGAAATGGC
CAN_R35	GCGATCACGAGTAGACGGGTGAGAATGCGAAATGGC
CAN_R36	CTAGACGTACATGTCGGGGTGAGAATGCGAAATGGC
CAN_R37	TAGCAGTCACTGTGCGGGGTGAGAATGCGAAATGGC
CAN_R38	CGTCATGCGATAGCTAGGGTGAGAATGCGAAATGGC
CAN_R39	GCGCAGTCGTCTGTATGGGTGAGAATGCGAAATGGC
CAN_R40	ATGAGCTACGTACAGAGGGTGAGAATGCGAAATGGC
CAN_R41	GTCGCGAGTCTATCAGGGGTGAGAATGCGAAATGGC
CAN_R42	ACATCGATCTGCACTAGGGTGAGAATGCGAAATGGC
CAN_R43	AGTATAGCATAGACGCGGGTGAGAATGCGAAATGGC
CAN_R44	GTGAGAGCGTGACTCTGGGTGAGAATGCGAAATGGC
CAN_R45	TGTCAGTAGATGACTCGGGTGAGAATGCGAAATGGC
CAN_R46	TCGTACGAGATCGACAGGGTGAGAATGCGAAATGGC
CAN_R47	CTACATGTGACTCGAGGGGTGAGAATGCGAAATGGC
CAN_R48	GCGCTATAGTGCTCGTGGGTGAGAATGCGAAATGGC
CAN_F1	GCGCTCTGTGTGCAGCTGGATCCAGTTTTCAATCTGTCG
CAN_F2	TCATGAGTCGACACTATGGATCCAGTTTTCAATCTGTCG
CAN_F3	TATCTATCGTATACGCTGGATCCAGTTTTCAATCTGTCG
CAN_F4	ATCACACTGCATCTGATGGATCCAGTTTTCAATCTGTCG
CAN_F5	ACGTACGCTCGTCATATGGATCCAGTTTTCAATCTGTCG
CAN_F6	TGTGAGTCAGTACGCGTGGATCCAGTTTTCAATCTGTCG
CAN_F7	AGAGACACGATACTCATGGATCCAGTTTTCAATCTGTCG
CAN_F8	CTGCTAGAGTCTACAGTGGATCCAGTTTTCAATCTGTCG
CAN_F9	AGCACTCGCGTCAGTGTGGATCCAGTTTTCAATCTGTCG
CAN_F10	TCATGCACGTCTCGCTTGGATCCAGTTTTCAATCTGTCG
CAN_F11	AGAGCATCTCTGTACTTGGATCCAGTTTTCAATCTGTCG
CAN_F12	CGCATCGACTACGCTATGGATCCAGTTTTCAATCTGTCG
CAN_F13	CGTAGCGTGCTATCACTGGATCCAGTTTTCAATCTGTCG
CAN_F14	ATGCTGATGACTGCGATGGATCCAGTTTTCAATCTGTCG
CAN_F15	TGCGTGAGCTGTACATTGGATCCAGTTTTCAATCTGTCG
CAN_F16	CGATCATCTATAGACATGGATCCAGTTTTCAATCTGTCG
CAN_F17	CGACGTATCTGACAGTTGGATCCAGTTTTCAATCTGTCG
CAN_F18	CACGTCACTAGAGCGATGGATCCAGTTTTCAATCTGTCG
CAN_F19	TGTCGCAGCTACTAGTTGGATCCAGTTTTCAATCTGTCG
CAN_F20	CATACGCTGTGTAGCATGGATCCAGTTTTCAATCTGTCG
CAN_F21	AGTCGCATGACTGTGTTGGATCCAGTTTTCAATCTGTCG
CAN_F22	CAGTACTGCACGATCGTGGATCCAGTTTTCAATCTGTCG
CAN_F23	GTGCTGAGCATCAGACTGGATCCAGTTTTCAATCTGTCG
CAN_F24	CACTGATCGATATGCATGGATCCAGTTTTCAATCTGTCG
CAN_F25	TACAGTGTCTGCTGCGTGGATCCAGTTTTCAATCTGTCG
CAN_F26	TACAGATAGTGTAGCGTGGATCCAGTTTTCAATCTGTCG
CAN_F27	TCGTAGAGCTCGAGACTGGATCCAGTTTTCAATCTGTCG
CAN_F28	GAGCTGCGCACTCGATTGGATCCAGTTTTCAATCTGTCG
CAN_F29	GCGATGTCGCTATGTGTGGATCCAGTTTTCAATCTGTCG
CAN_F30	CGAGAGTCAGCGCATATGGATCCAGTTTTCAATCTGTCG
CAN_F31	TCACGATGAGCACGTATGGATCCAGTTTTCAATCTGTCG
CAN_F32	GACTGAGATCATGATCTGGATCCAGTTTTCAATCTGTCG
CAN_F33	ACGACATGATACTGCTTGGATCCAGTTTTCAATCTGTCG
CAN_F34	ATACAGCACAGATGTGTGGATCCAGTTTTCAATCTGTCG
CAN_F35	ACAGTCGATATCTCTCTGGATCCAGTTTTCAATCTGTCG
CAN_F36	GCTCGATCACATGACGTGGATCCAGTTTTCAATCTGTCG
oTM-115	GATTTTACGTTACTTGATGGACCCAGA	RT-qPCR A3B
oTM-117	GGTCTGTCTCCTTCTCAAAACTAAAGG	RT-qPCR A3B
oTM-1348	AGTCAACGGTAGAACAATCAACAC	RT-qPCR ALD6
oTM-1349	GCAGCGGGTTTCAAGATACAG	RT-qPCR ALD6
SAR616	AGATTGAACATATTCAATTTGATTTTACCTATATCTATTGCTGCAGCTGTTTGTGTGAGAATAATCCCTGATAATATTCATAACACTAATACCTTAAATG	hdr donor for rev1∆-D467A, E468A
SAR617	CATTTAAGGTATTAGTGTTATGAATATTATCAGGGATTATTCTCACACAAACAGCTGCAGCAATAGATATAGGTAAAATCAAATTGAATATGTTCAATCT	hdr donor for rev1∆-D467A, E468A
oTM-1200	CGCAAATTACTCATCACATTTATTG
oTM-1203	TTGTATAGAGGTGTTTTCCCATTTC
SAR622	GGGATCCTATAGTGGTATGC
oTM-1204	TTGTATAGAGGTGTTTTCCCATTTC
SRO235	actgacTTTAAACAGGCCTATGGAAGCTTCTGTATGTTCTAGCGCTTGCACCATCCCATTTAACTGTAAGAAGAATTGCACGGTCCCAATTGCTCGAGAGATTTCTCTTTTACCTTTTTTTACTATTTTTCACTCTCCCATAACCTCCTATATTGACTGATCTGTAATAACCACGATATTATTGGAATAAATAGGGGCTTGAAATTTGGAAAAAAAAAAAAAACTGAAATATTTTCGTGATAAGTGATAGTGATATTCTTCTTTTATTTGCTACTGTTACTAAGTCTCATGTACTAACATCGATTGCTTCATTCTTTTTGTTGCTATATTATATGTTTAGCCAGCCTCTGGtgactg
SRO250	TTAGAGTCTTTTACACCATT

## Sheet: README
Supplemental Table S8: List and description of oligonucleotides used
